# Supplementary material for: β-cell deletion of the PKm1 and PKm2 isoforms of pyruvate kinase in mice reveals their essential role as nutrient sensors for the KATP channel
Source: eLife. 2022 Aug 23;11:e79422. doi: 10.7554/eLife.79422 (PMC9444242; doi:10.7554/eLife.79422)
Supplement: Figure 1—figure supplement 3—source data 1. [file elife-79422-fig1-figsupp3-data1.xlsx]

## Sheet: S3A
Time [m]	WT												PKM1 KO
0	82	99	73	60	61	60	62	55					85	67	73	68	71	77	62	56	100.0*
15	199	200	155	160	189	156	129	171					201	210	257	223	251	216	214	161	294.0*
30	190	188	177	148	188	176	171	149					188	146.5	197	197	170	203	192	164	315.0*
45	188	188	176	140	138	213	151	106					191	95.5	192	166	141	173	200	153	313.0*
60	148	170	141	126	136	139	134	88					131	84	199	166	141	142	149	148	300.0*
120	140	93	83	94	88	78	83	93					118	71	97	102	112	100	93	115	156.0*
*ROUT outlier test identified this data point as an outlier (Q=10%)

## Sheet: S3B
Time [m]	WT												PKM2 KO
0	69	68	73	74	105	116	85	102	118				91	94	60	75	65	135	98	98
15	185	151	153	204	220	283	212	228	216				282	281	151	188	141	245	177	248.5
30	249	176	152	207	237	212	235	208	166				198	192	147	139	142	237	197	203
45	178	122.5	198	152	166	231	247	216	142				272	138	158	108	151	209	187	198
60	141	142	149	134	175	224	181	175	136				228	125	121	102	137	234	161	202
120	122	116	84	104	112	201	124	141	106				156	132	109	69	105	132	76	145

## Sheet: S3C
Time [m]	WT												PCK2 KO
0	88	97	93	132	91	96	104	99	98	99	97		69	104	75	94	91	91	82	82	80	75	110	105
15	215	225	216	255	185	192	237	170	181	173	196		157	236	178	233	149	256	148	154	197	159	197	226
30	206	193	164	237	217	216	279	161	233	161	166		243	167	161	188	209.667	259	192	160	170	111	154	161
45	201	198	172	224	171	203	157	170	167	167	127		161	158	154	150	160	190	187	151	126	144	149	153
60	146	158	189	192	192	148.5	160	171	130	163	134		173	196	127	122	166	201	160	140	147	125	148	153
120	102	97	150	166	109	102	135	107.5	117.5	126.5	85		81	118	128	122	113	110	126	103	112	86	136	114
