# Supplementary material for: β-cell deletion of the PKm1 and PKm2 isoforms of pyruvate kinase in mice reveals their essential role as nutrient sensors for the KATP channel
Source: eLife. 2022 Aug 23;11:e79422. doi: 10.7554/eLife.79422 (PMC9444242; doi:10.7554/eLife.79422)
Supplement: Figure 1—source data 2. [file elife-79422-fig1-data2.xlsx]

## Sheet: 1B
	Con				PKM1 -KO
M1	0.818762	0.936846	0.987828	1.25656	0.27416	0.388377	0.271252	0.245759
M2		0.93458	0.90418	1.16124	1.33251	1.97287	1.26985	1.27313

## Sheet: 1C
	Con						PKM2 -KO
M2	1.24679	0.753209	0.479527	0.986328	0.72323	1.81092	0.012122	0.022304	0.071654	0.078372	0.066284	0.128889
M1	0.954625	1.04537	0.629558	0.877688	0.651922	1.84083	1.86881	2.70877	1.33807	0.523519	1.03544	2.80303

## Sheet: 1D
Con	PCK2 KO
1.35518	0.311721
0.85961	0.332801
0.995253	0.334032
0.789961	0.325294

## Sheet: 1E
Time	Control								PKm1 KO
0	129	115	94	92	153	112	103	99	112	82	82	102	109	67	77	115	190
15	209	229	195	250	257	196	183	231	262	173	243	163	260	204	179	137	326
30	253	268	223	218	256	176	229	227	179	173	233	222	269	213	240	145	251
45	176	201	189	207	257	197	221	158	224	204	258	233	238	218	164	135	283
60	180	233	163	209	262	201	182	161	214	155	209	144	227	173	160	140	257
120	127	150	118	140	175	148	124	117	150	93	87	125	127	111	99	124	182
AUC
WT	PKM1 KO
21098	23340
24570	17468
19463	22073
22853	19185
27773	24645
21353	19845
20813	18293
19530	16088
	29423

## Sheet: 1F
Time	Control							PKm2 KO
0	78	82	95	85	87	102	91	108	82	72.*	103	86	79	76	106
15	259	186	265	240	250	234	237	222	271	131.*	228	178	247	195	237
30	282	294	293	253	265	230	233	276	293	114.*	221	255	219	291	253
45	203	240	238	227	302	182	174	228	242	137.*	232	239	218	216	180
60	169	208	161	188	178	145	148	195	214	123.*	192	211	142	200	188
120	99	122	110	102	92	77	104	100	127	90.*	117	106	99	98	103
AUC
WT	PKM2 KO
21053	22013
22875	24540
21990	13583.*
21548	21698
22343	21818
18203	19148
19013	21540
	20985
*ROUT outlier test identified this data point as an outlier (Q=10%)

## Sheet: 1G
Time	WT										PCK2 KO
0	89	124	91	85	97	96	200	135	118	147	114	87	130	172	132	115	86	116	87	106
15	292	219	274	186	275	177	237	235	271	300	242	212	252	211	239	227	229	179	208	218
30	326.5	209	194	193	241	178	219	151	289	236	199	170	192	244	224.5	204	248	212	290.5	241
45	258	234	200	170	197	148	228	172	203	244.5	232	168	185	162	168	181	295	198	307	197
60	213	232	183	159	167	141	232	141	180	188	219	129	156	132	141	182	168	183	176	176
120	174	94	108	97	139	80	166	111	115	122	117	98	101	135	79	97	105	123	125	116
AUC
WT	PCK2 KO
27023	22673
22380	16680
20805	19290
17745	19545
21855	18120
15953	19778
25440	21675
18000	20258
22530	23085
23520	20715

## Sheet: 1H
PEP (mM)	Con		KO		Con/FBP		KO/FBP		Con/PKa		KO/PKa
2.5	1.06993	0.930075	0.033309	0.036381	1.3927	1.49874	0.141988	0.173076	1.35784	1.49874	0.18648	0.515343
1.25	1.09017	1.1535	0.02018	0.006182	1.40339	1.50581	0.206173	0.044859	1.36009	1.51087	0.088013	0.400371
0.625	1.01988	1.11356	0.039143	0.035852	1.32241	1.52704	0.157305	0.201156	1.31847	1.44313	0.16168	0.383946
0.313	0.853428	0.921482	0	0.003532	1.26224	1.33092	0.170434	0.137578	1.19251	1.35265	0.058108	0.269504
0.156	0.740399	0.557034	0	0	1.06486	1.08071	0.144176	0.19056	0.94565	1.13024	0.063943	0.273743
0.078	0.401878	0.246672	0	0.023136	0.683042	0.833529	0.062484	0.203276	0.531214	0.871441	0.035497	0.243013
0	0.040301	0	0	0	0.002624	0.042965	0.034038	0.092013	0	0.003033	0.017262	0
AUC
Con	KO	Con/FBP	KO/FBP	Con/PKa	KO/PKa
2.489	0.0889	3.28	0.4188	3.172	0.2994
2.484	0.04921	3.57	0.3186	3.547	0.9902

## Sheet: 1I
PEP (mM)	Con		KO		Con/FBP		KO/FBP		Con/PKa		KO/PKa
2.5	1.00765	0.992351	0.742665	0.755671	1.19962	1.22504	0.745916	0.758561	1.28278	1.31905	0.757116	0.767955
1.25	0.979026	0.962988	0.724601	0.800108	1.21295	1.24379	0.779515	0.806611	1.31856	1.31337	0.791438	0.748084
0.625	0.825794	0.82604	0.643675	0.712318	1.076	1.10388	0.680164	0.722795	1.19789	1.19395	0.685945	0.710511
0.3125	0.687366	0.714756	0.627779	0.645482	0.927455	0.953117	0.638256	0.657042	1.08118	0.935351	0.648372	0.632476
0.15625	0.602484	0.576328	0.634282	0.637533	0.796924	0.828262	0.623082	0.587677	0.927455	0.907468	0.567084	0.549743
0	0.003619	0.006827	-0.00409	0.015053	-0.00847	0.007814	0.006383	0.033117	0.007074	-0.01686	-0.03047	-0.01999
AUC
Con	KO	Con/FBP	KO/FBP	Con/PKa	KO/PKa
2.19	1.691	2.733	1.763	2.998	1.775
2.168	1.808	2.803	1.818	2.975	1.747
