# Supplementary material for: β-cell deletion of the PKm1 and PKm2 isoforms of pyruvate kinase in mice reveals their essential role as nutrient sensors for the KATP channel
Source: eLife. 2022 Aug 23;11:e79422. doi: 10.7554/eLife.79422 (PMC9444242; doi:10.7554/eLife.79422)
Supplement: Figure 2—source data 1. [file elife-79422-fig2-data1.xlsx]

## Sheet: 2A
Power				Frequency				Open time
ATP	ADP	PEP		ATP	ADP	PEP		ATP	ADP	PEP
0.028164	1	0.0007		0.132	1	0.44		0.045455	1	0.75
0.003723	1	0.193		0.029	1	0.274		0.005366	1	0.174
0.064443	1	0.262		0.106	1	0.572		0.017804	1	0.31
0.020654	1	0.148		0.049	1	0.433		0.029469	1	0.15
0.233309	1	0.136		0.2286	1	0.0052		0.268036	1	0.1
0.139791	1	0.06		0.162	1	0.251		0.163514	1	1.07
0.03274	1	0.78		0.158824	1	0.025		0.035517	1	0.0014

## Sheet: 2B
Power				Frequency				Open time
ATP	ADP	PEP		ATP	ADP	PEP		ATP	ADP	PEP
0.028164	1	0.988164		0.132	1	2.81		0.045455	1	0.915455
0.003723	1	0.076444		0.029	1	0.5		0.005366	1	0.085122
0.064443	1	0.645438		0.106	1	0.49		0.017804	1	0.991681
0.020654	1	2.40119		0.049	1	3.5		0.029469	1	3.28986
0.233309	1	0.926172		0.2286	1	1.15		0.268036	1	1.61875
0.139791	1	1.37278		0.162	1	1.66		0.163514	1	1.38829
0.03274	1	0.399806		0.158824	1	0		0.035517	1	1e-06
0.009126	1	0.413706		0.031126	1	0.303974		0.007333	1	0.208
0.159898	1	0.331068		0.777778	1	0.31746		0.288	1	0.432
0.000485	1	0.814111		0.006983	1	0.469274		0.000637	1	0.401911
0.000887	1	0.529548		0.018333	1	0.41		0.002945	1	0.808568
0.007506	1	0.658381		0.045627	1	0.519011		0.009195	1	0.681839
0.001008	1	0.00583		0.023899	1	0.960377		0.002578	1	0.939787
0.115578	1	0.070508		0.699015	1	0.094233		0.325959	1	0.01953
0.015234	1	0.614214		0.095567	1	0.293596		0.023462	1	0.095
0.000622	1	1.63912		0.008117	1	2.41721		0.002034	1	0.879661
0.120091	1	1.64763		0.150943	1	1.82303		0.140229	1	1.38695
0.001962	1	0.232296		0.012987	1	0.631169		0.001977	1	1.70474
0.058366	1	0.014952		0.123047	1	0.556641		0.083712	1	0.267023
0.007036	1	0.490534		0.008306	1	0.024917		0.007646	1	0.016097
								0.038086	1	0.901172

## Sheet: 2C
Power				Frequency				Open time
ATP	ADP	PEP		ATP	ADP	PEP		ATP	ADP	PEP
0.028164	1	0.242123		0.132	1	0.3667		0.045455	1	0.660277
0.003723	1	0.409876		0.029	1	1.51463		0.005366	1	0.270611
0.064443	1	0.665505		0.106	1	0.868405		0.017804	1	0.766353
0.020654	1	0.276411		0.049	1	0.540541		0.029469	1	0.511361
0.233309	1	0.115873		0.2286	1	0.207309		0.268036	1	0.558937
0.139791	1	0.000584		0.162	1	0.007463		0.163514	1	0.078268
0.03274	1	0.230467		0.158824	1	0.31544		0.035517	1	0.730621
0.009126	1	0.318135		0.031126	1	0.457286		0.007333	1	0.695703
0.159898	1	0.014343		0.777778	1	0.091684		0.288	1	0.156443

## Sheet: 2D
Power				Frequency				Open time
ATP	ADP	PEP		ATP	ADP	PEP		ATP	ADP	PEP
0.028164	1	0.1339		0.132	1	0.313869		0.045455	1	0.426613
0.003723	1	0.049406		0.029	1	0.087481		0.005366	1	0.56476
0.064443	1	0.019159		0.106	1	0.760075		0.017804	1	0.025206
0.020654	1	0.101678		0.049	1	0.087969		0.029469	1	1.15583
0.233309	1	0.180679		0.2286	1	3.36919		0.268036	1	0.053627
0.139791	1	0.143685		0.162	1	1.65078		0.163514	1	0.087041
0.03274	1	0.584466		0.158824	1	0.880342		0.035517	1	0.663908
0.009126	1	0.241359		0.031126	1	0.50768		0.007333	1	0.475414
0.159898	1	0.184693		0.777778	1	1.33442		0.288	1	0.138407

## Sheet: 2E
Power				Frequency				Open time
ATP	ADP	PEP		ATP	ADP	PEP		ATP	ADP	PEP
0.028164	1	0.156253		0.132	1	0.133198		0.045455	1	1.17309
0.003723	1	0.098742		0.029	1	0.171429		0.005366	1	0.575994
0.064443	1	0.136679		0.106	1	0.255584		0.017804	1	0.53477
0.020654	1	0.121648		0.049	1	0.160967		0.029469	1	0.755733
0.233309	1	0.319723		0.2286	1	0.444877		0.268036	1	0.718677
0.139791	1	0.375722		0.162	1			0.163514	1	0.147058
0.03274	1	0.219635		0.158824	1	0.895964		0.035517	1	0.245138
0.009126	1	0.078242		0.031126	1	0.295918		0.007333	1	0.264405
0.159898	1	0.259227		0.777778	1	0.450309		0.288	1	0.575665
0.000485	1	0.288163		0.006983	1			0.000637	1	0.124509
0.000887	1	0.063791		0.018333	1	0.097944		0.002945	1	0.651296
0.007506	1	0.49996		0.045627	1	0.539815		0.009195	1	0.926169
