# Supplementary material for: β-cell deletion of the PKm1 and PKm2 isoforms of pyruvate kinase in mice reveals their essential role as nutrient sensors for the KATP channel
Source: eLife. 2022 Aug 23;11:e79422. doi: 10.7554/eLife.79422 (PMC9444242; doi:10.7554/eLife.79422)
Supplement: Figure 3—figure supplement 1—source data 1. [file elife-79422-fig3-figsupp1-data1.xlsx]

## Sheet: S3A
Fold change
1.08485
1.03804
1.09145
1.08178
0.927461
1.13021
1.03212
0.931957
0.913043
0.992298
0.870008
1.09209
1.03297
1.04268
0.938605
1.03977
0.981037
0.88745
1.04103
1.07742
1.11519
1.00233
1.08022
0.995924
0.926466
1.01111
0.912195
0.994083
0.884065
1.29052
1.25189
1.11383
0.862082
1.37164
1.67514
1.20798
1.48809
1.30818
1.48809
1.09056
1.19048
1.20792
1.28173
1.12162
1
1.16326
1.03068
1.40816
1.04142
1.35802
1.38252
1.21501
1.03639
0.975765
1.70814
1.15
1.29091
1.08939
1.30574
1.0473
1.38717
1.3495
1.34405
1.09091
1.37423
1.18182
0.934053
1.04119
1.18182
1.17616
1.38475
1.19072
1.46002
1.29935
0.963855
1.24493

## Sheet: S3B
Silent Phase			Active Phase
control	control +Pka		control	control +Pka
1.0605	1.1371		2.077	1.4462
	1.1447			3.5386
2.0945	2.2105		1.3054	1.1563
0.5534	0.793		2.191	2.787
1.2814	1.3919		1.5853	1.399
0.6663	0.6827		4.6338	2.3299
1.2935	1.264		1.061	1.1361
1.2967	1.3477		0.8851	0.6336
1.7092	1.7755		0.9686	0.9518
2.1778	1.7422		1.1651	1.1479
1.2732	1.069		1.838	2.4596
1.8879	1.6892		0.912	0.8359
0.9851	1.0733		1.0899	1.3184
1.7896	2.34		1.0993	1.0269
1.2334	1.2128		1	0.7936
1.3078	0.928		1.5479	1.2275
1.3557	0.8626		0.9172	0.7651
1.1543	1.0598		1.0874	0.7661
1.0812	0.9223		1.3096	0.9685
2.0283	0.6779		1.1092	1.0447
1.5496	0.9215		1.2282	0.9622
1.5197	1.1982		1.5804	1.4491
1.1289	1.3513		0.8794	0.9103
0.3288	1.1722		1.7795	1.2925
1.0939	0.8768		1.0369	0.7382
1.1154	0.7282		2.6246	2.1747
1.1373	0.7306		1.4876	1.2217
1.538	1.0568		1.0221	1.0616
1.3929	0.7022		1.1873	1.092
1.1223	0.4429		2.6445	1.996
1.8339	1.9555		1.4518	1.3223
0.4872	0.6241		2.2572	3.3474
1.7325	2.1616		0.8676	1.6956
1.4618	1.0778		1.55	0.8222
1.7455	1.7081		1.6259	1.5141
1.947	1.6773		1.2655	1.6227
2.1133	2.3806		1.301	1.2819
1.455	1.2529		1.0151	1.0042
1.3679	1.2511		1.0022	0.729
1.5123	1.6305		1.0878	0.8529
1.0496	0.8015		0.9504	0.7185
1.1065	0.8115		0.7001	0.7636
0.8872	0.8756		1.0281	1.3529
1.3092	1.0743		0.9181	0.8695
1.2705	1.4736		0.8065	1.3628
0.9725	1.2178		0.6901	0.7009
1.0902	0.9316		1.0931	1.0551
1.0168	0.9557		1.2743	1.4365
1.3336	0.9496		0.883	0.8783
1.2232	1.0243		1.2496	1.0358
2.0897	1.8479		1.1728	1.0066
1.3992	1.1223		0.9259	0.7555
1.1359	1.211		1.1187	1.364
1.1144	1.09		1.2107	0.7866
1.4615	1.0103		2.7553	1.6079
2.8423	2.3157		1.1746	1.0968
1.2981	1.1056		0.9853	0.8003
1.014	0.8852		0.9091	0.9093
1.522	1.4661		0.7697	0.7768
1.4244	1.0964		1.4645	1.219
1.6567	1.5398		1.1989	1.2019
1.4912	1.7162		0.7339	0.7069
1.7745	1.8695		1.1631	1.1306
0.6406	0.4806		4.0096	1.6061
0.9379	1.0859		2.3746	1.3475
0.8328	0.9991		1.349	1.3885
1.0893	1.0337		1.2471	0.9377
1.0347	0.8757		1.8901	1.2843
1.6703	1.5852		2.1154	1.6149
1.6146	1.7251		3.1454	1.9624
1.3396	1.2973		1.3271	1.2727
1.4798	1.1784		3.7202	1.3398
1.5131	1.4999		3.7625	2.1126
1.8354	1.9816		3.2447	1.9756
1.353	1.049		1.897	1.1043
1.5153	1.2453		1.9098	1.0239
1.3022	0.8341		3.4379	2.276
2.086	1.8618		1.3425	0.9982
1.1678	1.0991		1.305	1.1702
1.3653	0.9696		1.4014	0.6019
2.1206	2.1101		1.5629	1.1232
2.0003	1.2072		2.4198	1.5383
2.0455	2.2379		1.8689	1.6248
1.8558	1.695		1.8608	1.105
1.4246	1.2954		2.8922	3.2378
1.5384	1.3097		2.5783	1.3539
1.9441	1.838		3.456	2.2336
1.9145	1.8099		2.3689	1.8151
1.7719	1.5668		1.5995	1.1415
1.636	0.9679		1.9926	1.4404
1.2621	0.8123		1.8129	0.8087
1.6095	1.52		1.0206	1.2891

## Sheet: S3C
Silent Phase			Active Phase
Control	KO		Control	KO
1.8517	1.2672		1.2483	1.6828
0.4245	1.0037		0.6227	1.2392
0.7878	0.9084		1.1979	1.4059
1.4389	1.2614		1.2778	1.5791
1.1977	1.3305		1.2883	1.6299
1.0978	1.5111		0.9522	1.2056
1.1912	1.7003		0.9213	1.6998
1.0851	1.0073		0.9483	1.1052
1.9314	1.2947		0.9695	1.5653
0.5299	1.0596		1.2371	1.4118
1.0595	1.0745		1.3551	1.7423
0.8865	1.0922		0.9637	1.0207
0.528	1.6222		0.9054	1.9271
0.643	1.5293		0.9025	1.4307
1.3143			1.2193
1.2361	0.7736		1.0354	1.7978
1.287	1.0492		1.363	1.2365
0.4161	1.7874		0.7089	1.4126
0.4066	0.7612		0.611	2.6988
1.0728			1.4415
2.3838	1.0951		1.4411	1.3849
1.0601	0.7782		1.5066	1.3718
1.0568			1.0807
1.3403			1.2168
1.6528	1.0793		1.4805	1.6406
0.5266	0.8916		0.8317	0.8973
	1.3752			1.5647
	1.1804			1.8196
0.9507	0.7343		0.7693	0.5086
1.4468	1.5683		1.003	1.7318
1.3843	1.8196		1.9409	1.6407
1.2539	1.5874		1.6795	1.6629
1.4179	1.2157		1.168	1.5178
0.7614	1.2189		0.994	1.0954
1.1341	1.3338		0.7326	1.9862
1.1251	1.771		1.4414	1.7893
1.354	1.6487		0.8317	1.3915
0.9959	1.0796		1.4757	1.2455
1.7265	1.5307		1.2738	1.8293
1.3385	1.995		1.2449	1.6803
0.9243			1.0313
0.3956	0.8918		0.3503	0.8381
0.3717	0.8847		0.4556	0.8953
0.7278	1.0622		0.5008	0.9879
0.9166	1.0992		0.8016	1.1295
0.7305	0.9084		0.5989	1.6748
0.5444			0.5431
0.6785	0.5688		0.5858	1.4935
0.9175	0.7379		0.7625	1.0122
	0.298			0.617
	0.7277			1.8866
	0.4438			1.9563
	0.8115			0.8996
	0.9144			1.0856
1.1932	1.8301		1.1568	1.4099
1.1385	0.8883		1.3186	1.0672
0.9667	1.4739		1.2834	1.486
0.6848	1.0796		1.1652	1.1329
1.2571	1.7162		1.2286	1.7588
0.8827	1.1829		0.8873	2.1973
0.9916	1.5412		0.9861	2.1088
0.7852	1.3738		0.9925	2.4512
1.0855	0.7917		1.2395	1.3833
1.5222	1.2445		1.411	1.0554
1.2049	1.7067		1.1666	1.6332
0.6004	1.4775		0.6072	1.6392
1.1554	1.0906		1.3017	1.7929
0.8246			0.8254
1.544			1.8359
0.9772	1.3051		0.8895	1.545
0.9367	1.4525		0.7855	1.5275
0.426	1.6695		0.5741	1.3505
1.5962	1.6776		1.2788	1.1827
0.7951	1.5674		0.6383	1.3525
1.1647	1.4342		1.0639	1.8409
1.6087	1.5733		1.3714	1.2266
0.755	1.4674		0.7201	1.6993
0.9714	1.5772		0.9661	1.5429
0.891	1.536		0.5398	1.2641
1.1141	2.0286		1.086	1.2715
1.9743	1.9399		1.4058	1.3203
	2.6004			1.4332
	1.5943			1.5557
	1.29			1.0602
	1.2663			1.0088
