# Supplementary material for: β-cell deletion of the PKm1 and PKm2 isoforms of pyruvate kinase in mice reveals their essential role as nutrient sensors for the KATP channel
Source: eLife. 2022 Aug 23;11:e79422. doi: 10.7554/eLife.79422 (PMC9444242; doi:10.7554/eLife.79422)
Supplement: Figure 3—source data 1. [file elife-79422-fig3-data1.xlsx]

## Sheet: 3B
Period			Amplitude			Duty Cycle
WT	KO		WT	KO		WT	KO
4.6501	2.6223		0.0921	0.0563		0.8436	0.6748
3.3124			0.0893			0.6782
2.1818	2.59		0.0771	0.0354		0.5731	0.6122
2.3364	2.15		0.0541	0.0529		0.505	0.7546
2.9248	4.1835		0.0766	0.0483		0.5885	0.7842
3.7857	3.8143		0.1186	0.1211		0.5389	0.6904
4.76	2.4888		0.0774	0.0703		0.6554	0.666
2.6667	3.3714		0.1092	0.0964		0.4632	0.735
5.2	2.9111		0.1184	0.0381		0.6519	0.828
5.2755	3.6571		0.0911	0.1331		0.7022	0.7579
5.0801	3.5429		0.0933	0.1043		0.6298	0.585
3.25	6.901		0.1059	0.0948		0.5566	0.7723
3.4251	3.6286		0.1525	0.1002		0.511	0.7271
	5.0501			0.0453			0.6885
	3.8334			0.0199			0.5891
	2.9375			0.0682			0.6344
4.7401	3.3859		0.1466	0.1424		0.7245	0.4944
3.4285	2.8556		0.1349	0.072		0.3833	0.5688
2.4727	2.1167		0.056	0.1305		0.5113	0.4647
2.7667	2.3		0.0828	0.188		0.4825	0.5282
3.6836	2.63		0.1478	0.0562		0.4246	0.4491
4.42	3.6571		0.1812	0.1475		0.5467	0.4759
3.9144	2.6777		0.1096	0.0685		0.4824	0.5904
3.7167	2.2584		0.1117	0.0855		0.4997	0.5063
4.3168	2.8		0.1051	0.0685		0.6536	0.3688
4.1167	3.3874		0.1442	0.143		0.6212	0.3857
5.4002	2.77		0.098	0.0176		0.6393	0.6231
4.2834	4.1801		0.1365	0.0507		0.5528	0.7428
3.3714	3.0001		0.1351	0.0907		0.475	0.4185
3.6286	4.0833		0.1838	0.1103		0.5417	0.6362
3.075	5.2501		0.2132	0.1424		0.5677	0.69
2.63	3.9336		0.1092	0.1803		0.3925	0.6652
	2.5558			0.1692			0.6116
3.1375	3.4626		0.173	0.1163		0.6144	0.5607
	2.64			0.1038			0.6674
3.4	3.0334		0.1691	0.1629		0.384	0.4502
2.7444	2.9777		0.0684	0.1375		0.7503	0.5578
2.8667	2.0846		0.114	0.257		0.5533	0.5547
5.3001	3.1375		0.0864	0.2027		0.7563	0.4162
2.3545	2.2273		0.1098	0.154		0.4448	0.4977
2.1818	3.425		0.1521	0.1675		0.4097	0.6419
2.6778			0.1989			0.3657
3.3429	3.6999		0.1724	0.176		0.3529	0.4042
3.1112	2.475		0.186	0.1244		0.6103	0.7397
2.8	3.4625		0.208	0.0949		0.3278	0.4851
2.075	3.85		0.1795	0.1164		0.5114	0.6325
2.8889	2.57		0.1893	0.1076		0.3873	0.4618
2.2334	3.175		0.1502	0.1581		0.4484	0.5479
	2.4901			0.2039			0.5101
2.8556	4.2334		0.0794	0.093		0.5243	0.7034
2.2728	2.4778		0.1839	0.0846		0.4064	0.5952
2.2417	2.2002		0.1281	0.0369		0.4765	0.4359
2.3908	2.0375		0.1238	0.1785		0.515	0.4857
3.1375	7.2669		0.1095	0.1021		0.3576	0.7865
2.7778	2.2499		0.1139	0.0864		0.4299	0.4571
3.1001	2.3091		0.1196	0.1837		0.5085	0.4118
2.0084	1.9916		0.1282	0.1432		0.4307	0.3934
2.1084	2.5801		0.0592	0.0795		0.8242	0.382
2.1308	2.6		0.1274	0.1715		0.4892	0.5244
3.74	1.7125		0.1094	0.197		0.6125	0.465
2.625	1.9846		0.0469	0.1106		0.5598	0.5365
2.5601	3.2		0.1142	0.1246		0.3958	0.4781
2.5801	3.425		0.0626	0.1078		0.4659	0.6578
3.7669	1.9769		0.0805	0.0406		0.6785	0.6527
3.2857	1.7467		0.1836	0.0568		0.4414	0.4836
2.7444	3.3286		0.0809	0.1981		0.8003	0.342
2.6001	3.2375		0.0833	0.1299		0.3374	0.6282
3.0117	3.4501		0.1021	0.0975		0.5118	0.7058
3.3713	2.6889		0.0995	0.1239		0.4801	0.4926
3.2125	3.35		0.0744	0.1186		0.3962	0.6512
3.4143	2.3728		0.0999	0.1052		0.3818	0.3769
2.4701	2.8779		0.1018	0.1491		0.4202	0.5338
2.3701	2.7445		0.1323	0.2296		0.4223	0.4402
2.6002	3.6857		0.1644	0.1275		0.4176	0.7085
2	2.5302		0.1972	0.1624		0.476	0.4301
1.8067	3.1501		0.1444	0.2123		0.3945	0.3121
1.9154	1.7334		0.1546	0.0999		0.5136	0.4352
2.2273	3.7		0.2122	0.0895		0.4129	0.4795
2.077	2.6668		0.1038	0.077		0.3887	0.4086
1.6626	2.5801		0.0855	0.2144		0.4041	0.363
2.1834	3.2501		0.1321	0.1495		0.5005	0.486
2.291	4.1169		0.0846	0.1138		0.5393	0.3525
2.2167	2.8445		0.1007	0.1947		0.4115	0.4065
2.4727	2.3		0.138	0.2486		0.5031	0.3802
3.2625	2.275		0.1231	0.0532		0.3661	0.6338
2.325	2.3		0.221	0.2392		0.4088	0.3479
2.2545	2.15		0.1218	0.1565		0.4897	0.4604
2.325	1.9308		0.1678	0.2097		0.4937	0.4399
4.2167	2.5101		0.1529	0.1672		0.6016	0.4195
4.0169	2.9777		0.1843	0.1707		0.2954	0.3133
2.2833	2.3001		0.1316	0.1552		0.4366	0.3849
1.9231	1.9072		0.1398	0.1164		0.4704	0.363
2.2917	4.45		0.1813	0.0834		0.3369	0.6165
2.8889	2.4454		0.1801	0.139		0.5076	0.5492
2.8556	3.3002		0.1735	0.1184		0.4218	0.553
2.225	2.7668		0.1076	0.1242		0.3315	0.5683
2.9376			0.1232			0.4056

## Sheet: 3C
Delay			Amplitude			Duration
WT	KO		WT	KO		WT	KO
3.5	3.3		0.15	0.09
4	3.6		0.114	0.116		7.696	9.8
3.8	3.7		0.191	0.171		5.495	8.9
3.7	3.4		0.246	0.171		6.095	7.5
3.9	3.8		0.213	0.239		6	7.9
3.9	3.6		0.146	0.201		6.2	6.7
3.8	3.4		0.184	0.205		5.1	7.1
3.6	3.4		0.245	0.163		5.9	9.4
3.6	3.4		0.284	0.13		5.5	6.3
3.9	3.7		0.298	0.183		5.2	5.7
4	3.7		0.241	0.197		4.9	9.8
3.9	3.4		0.298	0.154		4.6	7.5
4	3.6		0.187	0.087		5.5	10.5
3.6	3.6		0.075	0.167		4.6	6.7
4	3.7		0.156	0.178		5.1	8.2
						5.7	10
4.2	3.4		0.348	0.262		5	6.5
4	3.4		0.242	0.338			6.3
4.1	3.4		0.349	0.468		3.7	3.6
3.8	3		0.373	0.42		4.9	3.8
3.6	3.3		0.447	0.189		4.5	7.8
3.5	3.5		0.325	0.142		5.1	8.2
3.7	3.6		0.515	0.154		5.3
3.7	3.2		0.46	0.221		4.9
3.7	3.3		0.398	0.233		4
3.7	3.4		0.46	0.322		4.5
3.8	3.6		0.356	0.296		3.5	7.6
3.9	3.5		0.558	0.372		4.4
3.7	3.4		0.449	0.155		4.5
3.8			0.44	0.154		4	7.2
3
3.4	3.4		0.214	0.265		6	4.3
3.5	3.4		0.138	0.163		5	6
3.4	3.3		0.126	0.146			7
3.4	3.4		0.198	0.201		5	4.4
3.4	3.3		0.156	0.081		6.1	6
3.3	3.3		0.067	0.059
3.4	3.4		0.15	0.099		7.9	3.9
	3.4			0.092
	3.5			0.184		6.2
	3.4			0.232		6.3
	3.4			0.162		7.3
9.1	9		0.102	0.092		8.2	6.6
8.8	8.5		0.157	0.088		13.2	8.2
9.5	10.1		0.16	0.126		7.4	10.3
8.5	8.5		0.201	0.14		9.1	13.4
8.4			0.15			7.8
7.9	9.5		0.161	0.114		9.4	11.4
8.7	9.4		0.094	0.118		10.8	8.3
8.2	9.6		0.098	0.076		6.9	7.4
8.5	8.1		0.091	0.146		9.7	9.1
8.5	8.6		0.163	0.154		13.5	11.7
8.4			0.137			9.5
8.6			0.194			9.7
8.7			0.127			8.5
5.5	5.4		0.071	0.059			2.8
	5.3			0.051			2.6
5.4	5.4		0.05	0.058		6.4	3
5.3	5.6		0.054	0.073		5.5
5.5	5.3		0.086	0.076		2.9	3
5.4	5.3		0.084	0.165			6.4
5.3	5.3		0.091	0.112		6.9	3.7
5.4	5.3		0.12	0.106		2.8	6.4
5.3	5.4		0.056	0.104		4.8	3.6
5.3	5.4		0.075	0.075		5.9	3.3
5.1	5.3		0.085	0.121		6	3.6
5.3	5.4		0.053	0.091		5.3	3.2
5.4	5.3		0.093	0.077		3.1	3.5
5.4	5.5		0.071	0.058		6.3	2.9
	5.2			0.043
						10.3	9.3
4.4	3.7		0.044	0.026		10.1	8.7
3.9	3.6		0.044	0.012		9.6	10.1
4.6	4.2		0.047	0.049		8.6	8.2
4.2	3.8		0.067	0.087		10	8.8
	3.7			0.081		7.7	9.2
						10.8	7.8
						9.5	9.7
						8.9	8.3
4.3	4.2		0.033	0.024		9.7	7.9
4.2	4.1		0.038	0.036		10.9	8.6
4.1	4.2		0.044	0.067		10.2	10.4
4.2	4		0.068	0.066		11.5	7.7
4.2	4.1		0.051	0.116		8.3	10.5
4.1	4.2		0.072	0.041		11.8	9.8
4.2	4.5		0.054	0.07		8.3	9.9
4.4	4		0.058	0.062		10.5
4.2	3.9		0.052	0.071
4.1	4.2		0.066	0.082
4.3			0.114			7	8.2
4.3			0.107				12.4
4.2			0.062			5.6	7.3
4.6			0.054			9.2	6.6
4.3			0.034			6.3	6
						7.2	4.2
						5	7
						5.6	7.2
						7.2	5.2
6.5	6.6		0.083	0.108			3.4
6.2	5.8		0.196	0.071
6.7	6.7		0.149	0.103		4.3
6.7	7.3		0.117	0.098		5.2
6.3	6.1		0.151	0.093
5.7	6.6		0.106	0.149
6	7		0.091	0.173		5.6	6.6
6.9	6.7		0.147	0.155		6.2	6.2
6.1	6.1		0.099	0.132		5.7	2.5
6.1	6.1		0.105	0.134		5.3	4.1
6.1	5.7		0.134	0.142			6.5
7	5.6		0.161	0.042
6	6.1		0.064	0.171
6.1	6.5		0.13	0.17
5.7	5.9		0.175	0.171		6.2	8.1
6.3	7.4		0.419	0.107		4	9.9
6.4			0.164			5.1	5.4
						4.5	6.8
						4.6	4.4
			0.076	0.042		6.5	11.7
4.9	4.8		0.057	0.081		5	3.7
5	4.3		0.051	0.082		4.7	6.3
4.7	4.8		0.05	0.054		5.7	6.9
4.9	4		0.052	0.088		6.2	2.3
5.6	3.9		0.079	0.117		5.3
4.7	4.2		0.052	0.073		4.3
4.9	3.9		0.102	0.07		6.3
4.8	4.7		0.068	0.057		5.5
4.8	5.1		0.065	0.086		6.1
5.2	4.6		0.056
5.1			0.085
5.1			0.061
4.8			0.087			7.5
4.8						8.8	6.2
			0.038			3.8	6.3
4.7						7.3	4.8
						6.2	4.9
						10	5.3
						7.7	3.7
4.5	4.9		0.042	0.078		4.8	2.9
4.5	4.7		0.072	0.025		6.1	3.4
4.6	4.6		0.059	0.084		5.3	6.2
4.7	5.2		0.052	0.069		6	5.9
4.7	5.2		0.163	0.08		5.1	5.2
4.8	5		0.085	0.063		8.5	6.3
4.6	5.2		0.107	0.209		5.6	4.7
4.9	5.2		0.108	0.078		6.3	4.6
4.8	5.2		0.143	0.105		6.1	4.3
5	4.8		0.106	0.083			6
4.9	5.2		0.04	0.216		6.8	7.3
4.8	4.9		0.032	0.196		6.2	10.1
4.5	4.7		0.066	0.172			3.7
4.9	4.8		0.067	0.054			5.5
4.8	4.9		0.108	0.059			9.5
4.8	5.3		0.06	0.051			4.3
4.5	4.9		0.066	0.052
5	4.7		0.076	0.05
4.7	4.3		0.034	0.022
	5.1			0.083
	5.2			0.087
	4.7			0.096
	4.9			0.026		5.7	3.5
						5.6	2.5
						6.2	6.8
4.3	4.4		0.196	0.043		6.4	5.6
4.2	4.8		0.142	0.064		5	4.3
4	4.1		0.09	0.07		10.4	6.5
4.2	4.2		0.097	0.037		8.1	4
4.3	4.3		0.136	0.072		7.4	1.1
4.1	4.4		0.128	0.08		7.4	1.7
4.3	4.4		0.101	0.068		6.6	5.6
4.3	4.5		0.093	0.099		6.2	4.3
4.2	4.4		0.086	0.081		4.9	6.6
4.3	4.3		0.11	0.094		6.1
4.3	4.4		0.069	0.086		4.6	6.1
4.7	4.2		0.073	0.272		8.1	4.5
4.4	4.3		0.26	0.08		8	2.7
4.3	4.4		0.119	0.145		8.9	9.1
4.1	4.6		0.145	0.118
4.2	4.5		0.154
4.2	4.3		0.105	0.057
150	144

## Sheet: 3D
Period			Amplitude			Duty Cycle
WT	KO		WT	KO		WT	KO
6.4334	4.08		0.0175	0.0249		0.6931	0.5337
	4.2751			0.0251			0.5179
	4			0.0172			0.377
6.2367	3.6201		0.0106	0.0179		0.723	0.4466
5.3665	3.2165		0.0132	0.0143		0.5421	0.5277
3.4667	7.0003		0.024	0.0119		0.4789	0.6716
4.2249	5.7665		0.0368	0.0202		0.5638	0.6437
7.65	5.6667		0.0597	0.0172		0.7578	0.7346
	5.9999			0.0221			0.6181
	4.8251			0.0207			0.5518
	3.9802			0.0141			0.5379
4.934	4.0751		0.0165	0.0162		0.7093	0.6852
4.8572	7.9		0.0311	0.0132		0.6675	0.8001
12.2005			0.0141			0.8843
	2.0278			0.0168			0.4728
	8.025			0.0201			0.8388
	4.0501			0.0167			0.687
6.4801	3.175		0.0249	0.0122		0.8456	0.8019
	6.1666			0.0257			0.7031
3.2749	17		0.027	0.0174		0.6526	0.935
	3.7112			0.0222			0.6426
5.0598	8.133		0.016	0.0154		0.6069	0.7256
4.8601	8.0002		0.015	0.0139		0.4935	0.7072
3.5858	5.0001		0.0141	0.0076		0.5249	0.7051
4.2401	7.6332		0.0204	0.0196		0.5526	0.7252
6.1251			0.0273			0.6879
5.8502			0.0196			0.6547
	11.0501			0.0288			0.7701
6.425	8.3		0.0264	0.0156		0.6619	0.7259
	6.9997			0.0206			0.5239
7.8996	5.9001		0.0183	0.0316		0.6921	0.6506
6.0997	7.0335		0.0346	0.0136		0.6838	0.7464
	3.825			0.0197			0.4834
4.9201	5.3002		0.0074	0.0065		0.6518	0.7293
2.4			0.0072			0.583
5.02	8.301		0.0193	0.0096		0.7063	0.796
1.6615	5.3999		0.0089	0.0067		0.4362	0.6985
6.9	3.1		0.0191	0.0115		0.7803	0.5764
2.33			0.0183			0.4191
5.0002	8.3333		0.0127	0.0088		0.6009	0.87
2.8	3.0999		0.0094	0.0081		0.646	0.5592
4.0667	4.55		0.0124	0.0093		0.6427	0.6552
4.5334	4.1166		0.0206	0.0159		0.702	0.6109
2.3			0.0106			0.4063
2.6888	5.875		0.0244	0.0258		0.562	0.7069
3.7499	6.0671		0.038	0.0214		0.5279	0.7249
4.9401	4.7399		0.0209	0.0237		0.6126	0.6208
4.52	5.8504		0.0209	0.0224		0.6	0.6794
4.9399	8.0502		0.0397	0.0278		0.5888	0.7779
	16.8001			0.0307			0.8579
6.6669	6.2333		0.0134	0.0222		0.7267	0.7093
5.5001	8.4001		0.0545	0.0174		0.7505	0.7864
	3.7334			0.0166			0.6159
6.4003	3.9499		0.015	0.0315		0.8398	0.5205
4.36	4.1833		0.0188	0.0286		0.5564	0.6454
3.3857	8.1666		0.0272	0.0247		0.4298	0.8351
4.42	3.8167		0.0259	0.0167		0.5799	0.5051
6.4333	10.2		0.0138	0.011		0.8067	0.718
	3.7572			0.0068			0.7874
8.8003	4.4667		0.016	0.0051		0.7618	0.7728
3.5	12.9998		0.0099	0.0339		0.7496	0.8435
4.7602	5.7		0.0311	0.0283		0.5713	0.6516
4.9801	13.2		0.0273	0.0162		0.6385	0.8411
2.81	6.0331		0.0053	0.0286		0.7755	0.6611
3.5			0.0288			0.5538
3.7668	4.1998		0.0176	0.0216		0.5652	0.5475
7	12.3998		0.0116	0.0255		0.9063	0.8377
8.0999	5.075		0.009	0.0315		0.8367	0.7177
3.8833			0.018			0.5921
5.2001	5.0672		0.0403	0.0266		0.4278	0.5638
5.8006	4.3332		0.0331	0.0689		0.3671	0.4614
4.3676	5.3496		0.054	0.0714		0.439	0.5532
4.8334	3.8999		0.0481	0.0623		0.5722	0.485
5.8	3.4001		0.043	0.0577		0.4843	0.4284
4.1005	4.8001		0.0529	0.0693		0.4048	0.52
4.5336	5.5004		0.0683	0.0541		0.5326	0.3297
4.5002	5.2012		0.049	0.0812		0.3969	0.4924
4.7002	5.5338		0.0322	0.086		0.413	0.3254
4.0666	5.2011		0.048	0.0424		0.4392	0.5569
4.8667	6.6001		0.066	0.0638		0.4454	0.3285
4.6668	5.3503		0.0417	0.0367		0.3209	0.4834
5.5001	7.4001		0.0593	0.0515		0.3433	0.4143
4.5668	5.7341		0.0353	0.0669		0.3773	0.4125
3.6667	5.5999		0.0494	0.066		0.4804	0.3582
3.9001	3.9005		0.0295	0.0757		0.4486	0.4698
5.6501	5.2		0.0427	0.026		0.334	0.3567
3.9251	5.9002		0.055	0.057		0.3721	0.2926
3.8252	3.9667		0.0504	0.0109		0.4125	0.398
4.2001	4.7668		0.0802	0.0442		0.4271	0.397
5.5334	4.8333		0.0892	0.0819		0.3156	0.3547
4.1751	4.7334		0.0566	0.0512		0.4356	0.4706
4.175	4.4		0.0516	0.0835		0.4318	0.3655
5.0665	4.2671		0.0747	0.051		0.3052	0.4721
4.0673	5.0668		0.0628	0.0858		0.4521	0.3248
4.3669	4.6006		0.0827	0.0706		0.4013	0.4247
4.8669	5.4998		0.0841	0.0707		0.3219	0.3403
3.8252	5.6672		0.072	0.0559		0.4299	0.3419
4.4668			0.0678			0.3329
5.0335	3.6749		0.0131	0.0312		0.4244	0.4497
4.225	4.2667		0.0599	0.0577		0.4271	0.4073
5.0666	4.3001		0.0729	0.0213		0.364	0.4409
4.9098	4.7332		0.059	0.0565		0.3848	0.4024
4.867	5.4999		0.085	0.0437		0.3949	0.3644
5.3006	5.4005		0.0937	0.0298		0.3752	0.3594
4.7667	4.8333		0.0513	0.0568		0.3432	0.4195
4.1328	5.6336		0.0498	0.0379		0.3944	0.3214
3.9671	5.1002		0.0673	0.054		0.4897	0.4059
4.4006	4.8669		0.065	0.0368		0.4008	0.3141
5.3502	4.1001		0.0387	0.041		0.3655	0.3852
4.8003	6.0502		0.0374	0.057		0.337	0.3059
4.3338	4.4001		0.0589	0.038		0.4419	0.3694
	4.3337			0.0587			0.4011
3.8751	5.0002		0.0368	0.0357		0.466	0.476
3.525	3.26		0.012	0.0252		0.4096	0.357
3.7001	4.4667		0.0352	0.0467		0.4802	0.4125
4.6003	3.467		0.0581	0.0355		0.3191	0.4132
3.8	4.2503		0.0411	0.0288		0.3639	0.4397
3.6	4.0337		0.0679	0.0511		0.3772	0.3252
4.9499	4.0751		0.0241	0.0455		0.3886	0.3082
4.5335	3.74		0.0956	0.038		0.3995	0.3533
4.7002	3.7003		0.0626	0.0291		0.4183	0.379
4.9006	3.2798		0.0687	0.0493		0.4331	0.3837
3.9002	4.7		0.0172	0.051		0.4579	0.3719
3.475	5.6669		0.0656	0.0613		0.4349	0.3011
3.7502	4.7		0.057	0.0499		0.4399	0.3243
3.8	5.0501		0.044	0.041		0.3954	0.4084
3.2799	4.4502		0.0401	0.1058		0.4081	0.3308
4.1502			0.0262			0.4183
111	118

## Sheet: 3E
Delay			Amplitude			Duration
WT	KO		WT	KO		WT	KO
3.7	3.7		0.102	0.103		5.2	3.6
3.7	3.7		0.135	0.112		4.1	4.6
3.5	3.7		0.074	0.066
3.4	3.6		0.131	0.105		3.9	5.2
3.4	3.7		0.064	0.114			5.4
3.7	3.7		0.111	0.108		5.5	5.3
3.4	3.7		0.064	0.042		3.3	5
3.7	3.7		0.114	0.145			5.4
3.7	3.7		0.102	0.07		6.1	5.2
3.7	3.7		0.06	0.137		3	4.8
4.1	3.7		0.114	0.126		3.2
3.7	3.5		0.068	0.131		4	5.3
3.8	3
3.6	2.9		0.083	0.083			7.1
3.9	3		0.082	0.122		3.8	4.2
2.9	3		0.094	0.142		4.7	5.2
3.7	3		0.135	0.144		6	5.9
3.4	2.8		0.045	0.13
2.9	3.2		0.151	0.095		4.5	7
2.9	3.7		0.093	0.063			3.5
2.2	3.4		0.114	0.117		3.9	5
3	2.8		0.194	0.127		5.3	4
3	2.7		0.13	0.065		4.6
3			0.192	0.088		5.6	3.2
			0.154			3.8
3.9	3.2					7.5	4.2
3.7	2.8		0.106	0.199		6.7	5.1
3.4	3.3		0.101	0.177		6.8	7.1
3.1	3		0.112	0.183		6.9	6.5
3.5	2.8		0.167	0.173		5.4
3.3	3.5		0.191	0.128
3.3	3.4		0.185	0.146			5.9
3.1	3.1		0.147	0.136		5.1	6.6
2.9	3.1		0.176	0.13		5.7	5.6
3.2	3.1		0.111	0.136		5.8	5.7
3	3.3		0.076	0.117		6.4
3.3	2.8		0.111	0.091		5.3	7.7
3.3	2.9		0.189	0.185		5.3	6.7
3.1			0.193	0.126		5.8
3.1			0.138			7.1
			0.137
3.3	3.3					6.7	8.2
3.4	3		0.197	0.142		6.6	8.2
3.3	2.8		0.131	0.146		6.7	6.7
3.4	3.2		0.112	0.128		5.9	5.5
3.2	3.1		0.161	0.162		6.4	7.3
3.2	2.6		0.2	0.164		6.8	7.6
3.2	2.9		0.201	0.196			8.1
3.1	2.6		0.125	0.218		7.4	6.5
3.2	2.8		0.157	0.146		6.6	6.8
3.2	2.5		0.192	0.158		6.5	7
2.8	3.2		0.148	0.165		8	6.3
2.8	3		0.187	0.224		7.5	6.5
3.2	3		0.214	0.17		6.3	7.5
3.1	3.3		0.218	0.126		7.8	6.6
2.9	2.6		0.171	0.137		6.4	8.6
			0.046	0.115		4.5	4.2

## Sheet: 3F
Period			Amplitude			Duty Cycle
-PKa	+PKa		-PKa	+PKa		-PKa	+PKa
4.6501	2.0867		0.0921	0.0642		0.8436	0.7156
3.3124	2.4334		0.0893	0.0629		0.6782	0.5736
2.1818	2.3875		0.0771	0.0633		0.5731	0.5635
2.3364	1.9714		0.0541	0.044		0.505	0.4409
2.9248	2.1599		0.0766	0.0519		0.5885	0.557
3.7857	3.2001		0.1186	0.0894		0.5389	0.494
4.76	3.6876		0.0774	0.0666		0.6554	0.5305
2.6667	2.57		0.1092	0.0824		0.4632	0.4663
5.2	2.5182		0.1184	0.0759		0.6519	0.5257
5.2755	3.6125		0.0911	0.0634		0.7022	0.5853
5.0801	3.9572		0.0933	0.0668		0.6298	0.5005
3.25	2.1533		0.1059	0.0721		0.5566	0.4899
3.4251	2.2693		0.1525	0.0968		0.511	0.4373
4.7401	3.11		0.1466	0.0978		0.7245	0.7103
3.4285	2.86		0.1349	0.1001		0.3833	0.342
2.4727	2.2693		0.056	0.0415		0.5113	0.4338
2.7667	1.5715		0.0828	0.0525		0.4825	0.3834
3.6836	3.2332		0.1478	0.1068		0.4246	0.3589
4.42	2.7455		0.1812	0.118		0.5467	0.5449
3.9144	3.8627		0.1096	0.0849		0.4824	0.4281
3.7167	2.8		0.1117	0.0762		0.4997	0.3916
4.3168	4.5333		0.1051	0.0844		0.6536	0.7062
4.1167	2.6636		0.1442	0.0995		0.6212	0.4828
5.4002	4.0715		0.098	0.0803		0.6393	0.5493
4.2834	3.625		0.1365	0.0951		0.5528	0.4888
3.3714	2.7084		0.1351	0.0884		0.475	0.4298
3.6286	2.4083		0.1838	0.1223		0.5417	0.5652
3.075	1.621		0.2132	0.1383		0.5677	0.4538
2.63	2.8092		0.1092	0.079		0.3925	0.4081
3.1375	2.5833		0.173	0.1153		0.6144	0.5532
3.4	3.3667		0.1691	0.1206		0.384	0.3627
2.7444	3.58		0.0684	0.0654		0.7503	0.7612
2.8667	2.7909		0.114	0.0762		0.5533	0.4921
			0.0864	0.0638		0.7563	0.7181
2.3545	2.4		0.1098	0.0762		0.4448	0.4447
2.1818	1.9813		0.1521	0.1029		0.4097	0.3182
2.6778	2.7273		0.1989	0.1395		0.3657	0.3534
3.3429	2.8901		0.1724	0.1134		0.3529	0.4013
3.1112	3.5286		0.186	0.1394		0.6103	0.6682
2.8	2.5251		0.208	0.1336		0.3278	0.3393
2.075	2.3916		0.1795	0.1337		0.5114	0.5344
2.8889	3.3668		0.1893	0.1321		0.3873	0.3158
2.2334	2.0063		0.1502	0.1066		0.4484	0.3961
2.8556	2.4637		0.0794	0.0523		0.5243	0.4752
2.2728	1.7825		0.1839	0.1309		0.4064	0.4294
2.2417	1.7814		0.1281	0.0901		0.4765	0.4086
2.3908	1.7938		0.1238	0.0861		0.515	0.4851
3.1375	2.7		0.1095	0.0695		0.3576	0.3866
2.7778	2.2308		0.1139	0.0764		0.4299	0.4257
3.1001	2.6556		0.1196	0.0834		0.5085	0.5122
2.0084	1.7412		0.1282	0.0888		0.4307	0.49
2.1084	1.6053		0.0592	0.0446		0.8242	0.7616
2.1308	1.7001		0.1274	0.0893		0.4892	0.4344
3.74	3.1751		0.1094	0.0894		0.6125	0.6552
2.625	2.1925		0.0469	0.0311		0.5598	0.5187
2.5601	2.2384		0.1142	0.0794		0.3958	0.4502
2.5801	2.1834		0.0626	0.0419		0.4659	0.477
3.7669	3.1125		0.0805	0.0626		0.6785	0.6079
			0.1836	0.1272		0.4414	0.4059
3.2857	3.2778		0.0809	0.0728		0.8003	0.7722
2.7444	3.9715		0.0833	0.0673		0.3374	0.4133
2.6001	3.8572		0.1021	0.0672		0.5118	0.4294
3.0117	1.9		0.0995	0.068		0.4801	0.4769
3.3713	3.2222		0.0744	0.0385		0.3962	0.4964
3.2125	3.3		0.0999	0.0661		0.3818	0.3577
3.4143	3.6624		0.1018	0.0706		0.4202	0.4407
2.4701	2.2571		0.1323	0.0937		0.4223	0.3565
2.3701	1.98		0.1644	0.1208		0.4176	0.344
2.6002	2.4834		0.1972	0.1222		0.476	0.4395
2	1.52		0.1444	0.101		0.3945	0.4623
1.8067	1.5751		0.1546	0.119		0.5136	0.5368
1.9154	2.2286		0.2122	0.1432		0.4129	0.4447
2.2273	1.9438		0.1038	0.0822		0.3887	0.4447
2.077	2.8364		0.0855	0.0626		0.4041	0.3629
1.6626	1.9188		0.1321	0.0935		0.5005	0.5117
2.1834	1.9867		0.0846	0.0566		0.5393	0.5728
2.291	2.3922
2.2167	1.8278		0.1007	0.071		0.4115	0.4537
2.4727	2.06		0.138	0.0933		0.5031	0.4742
3.2625	2.8546		0.1231	0.0861		0.3661	0.358
2.325	1.8778		0.221	0.1593		0.4088	0.4016
2.2545	2.575		0.1218	0.0906		0.4897	0.5339
2.325	1.8765		0.1678	0.1249		0.4937	0.4094
			0.1529	0.1001		0.6016	0.554
			0.1843	0.1254		0.2954	0.3227
2.2833	1.9059		0.1316	0.0941		0.4366	0.4195
1.9231	1.7945		0.1398	0.0999		0.4704	0.4936
2.2917	2.2429		0.1813	0.1243		0.3369	0.3497
2.8889	2.3154		0.1801	0.118		0.5076	0.5206
2.8556	2.7417		0.1735	0.1211		0.4218	0.4368
2.225	2.4231		0.1076	0.0826		0.3315	0.2911
2.9376	3.0001		0.1232	0.0889		0.4056	0.3775
88	88		91	91		91	91

## Sheet: 3G
Delay			Amplitude			Duration
-PKa	+PKa		-PKa	+PKa		-PKa	+PKa
2.004	2.2		0.15	0.291		7.696	4.7
2.105	2.5		0.114	0.354		5.495	4.5
2.105	2.5		0.191	0.444		6.095	4.4
2.3	2.9		0.246	0.315		6	4.5
2.3	2.4		0.213	0.422		6.2	4.5
2.4	2.5		0.146	0.427		5.1	4.6
1.9	2.4		0.184	0.24		5.9	4.3
1.9	2.3		0.245	0.251		5.5	5
2.5	2.2		0.284	0.277		5.2
2.8	2.3		0.298	0.351		4.9	4.8
2.4	2.4		0.241	0.182		4.6	4.9
2.6	2.3		0.298	0.374		5.5	4.2
2.7	2.4		0.187	0.342		4.6	4.3
2.7			0.075			5.1
2.5			0.156			5.7
2.6						5
2.2			0.348
1.8			0.242			3.7
2.2			0.349			4.9
2.4			0.373			4.5
2.5			0.447			5.1
2.4			0.325			5.3
2.2			0.515			4.9
2.2			0.46			4
2.3			0.398			4.5
2.3			0.46			3.5
2.2			0.356			4.4
2.1			0.558			4.5
2.8			0.449			4
			0.44
						6	4.7
			0.214	0.189		5	6.5
2.6	2.6		0.138	0.198			4.2
2.6	2.5		0.126	0.235		5	5
2.1	2.6		0.198	0.286		6.1	4.2
2.3	2.5		0.156	0.265			5.7
2.2	2.7		0.067	0.287		7.9	3.9
2.1	2.6		0.15	0.29			5
2.6	2.6			0.229		6.2	5.8
	2.7			0.205		6.3	5.2
	2.2			0.297		7.3	5.1
	2.6			0.361			5.5
	2.7			0.288			4.6
	2.3			0.246
	2.7
			0.102	0.047		8.2	4.4
			0.157	0.051		13.2
			0.16	0.026		7.4	2.6
6.2	4		0.201	0.045		9.1	2
5.3	4.3		0.15	0.037		7.8	2
5.6	4.8		0.161	0.068		9.4	3.7
5.2	4.9		0.094	0.091		10.8	3.3
5.4	4.7		0.098	0.087		6.9	3.8
5	4		0.091	0.094		9.7	3.5
5.3	4.1		0.163	0.071		13.5	3.4
6	4.2		0.137	0.047		9.5	3.6
5.9	4.4		0.194	0.084		9.7	3
5.2	4.2		0.127	0.09		8.5	2.6
5	4.4			0.046			3.4
5.1	4.1
6	4.2					10.3	5.5
	4.2					10.1	3.3
						9.6	2.2
						8.6	2.1
4.5			0.071			10	2.6
						7.7	3.2
4.4			0.05			10.8	2.8
4.4			0.054			9.5	2.9
4.5			0.086			8.9	4
4.3			0.084			9.7	4
4.1			0.091			10.9	4.2
4.4			0.12			10.2	6.6
4.1			0.056			11.5
4.2			0.075			8.3	2.6
4.3			0.085			11.8	6.8
4.6			0.053			8.3	3.4
4.3			0.093			10.5	2.4
4.4			0.071
						7
			0.044			5.6
			0.044			9.2
			0.047			6.3
			0.067			7.2
						5
3.5						5.6
3.7						7.2
3.5
3.6			0.033
3.3			0.038			4.3
3.3			0.044			5.2
3.5			0.068
3.5			0.051
3.6			0.072			5.6
2.6			0.054			6.2
3.4			0.058			5.7
3.4			0.052			5.3
3.3			0.066
3.5			0.114
3.7			0.107
			0.062
			0.054			6.2
4.2	2.5		0.034			4
4	3.5					5.1
4	4.1					4.5
4.8	3.9		0.083	0.091		4.6
4.4	3.4		0.196	0.045		6.5
4	3.7		0.149	0.044		5
4.2	3.2		0.117	0.086		4.7
4.4	3.2		0.151	0.048		5.7
4.3	3.5		0.106	0.058		6.2
4.5	3.7		0.091	0.048		5.3
4.3	2.9		0.147	0.097		4.3
4.3	3		0.099	0.066		6.3
4.5	3.3		0.105	0.077		5.5
4.4	3.4		0.134	0.061		6.1
3.6	3.3		0.161	0.073
4.1	2.6		0.064	0.035
4.2	3.4		0.13	0.058		5.7
			0.175	0.049		5.6	7.9
			0.419	0.06		6.2
3.2			0.164	0.073		6.4	6.8
3.5						5	7.6
3.6						10.4	8.3
3.2			0.076			8.1	7.6
3.6			0.057			7.4	6.4
3			0.051			7.4	6.6
3.9			0.05			6.6	6.9
3.9			0.052			6.2	7.6
2.6			0.079			4.9	5.8
3.6			0.052			6.1
3.1			0.102			4.6	6.6
4.3			0.068			8.1	6.3
3.4			0.065			8	7.8
3.4			0.056			8.9	8
			0.085				6.9
3.4			0.061
			0.087
2.9			0.038
2.8
3.1						5.2
2.9			0.196	0.045		4.1
			0.142
			0.09	0.094		3.9	4.3
			0.097	0.133			3.6
			0.136	0.092		5.5
3.6	3.4		0.128	0.086		3.3
3.3			0.101	0.108
3.2	3.7		0.093	0.109		6.1
3.4	3.4		0.086	0.1		3
3.5	3.3		0.11	0.078		3.2	3.1
3.1	3.4		0.069	0.103		4
3.1	3.2		0.073
3.3	3.7		0.26	0.077
3	3.6		0.119	0.061
3.1	3.7		0.145	0.05		3.8
3.3	3.5		0.154	0.086		4.7
3.7			0.105	0.055		6
3.6	3.5						2.8
3.6	3.4					4.5
3.1	3.5		0.127	0.07
2.9	3.7		0.104	0.137		3.9	5.4
2.6	3.5		0.219	0.102		5.3
			0.211	0.048		4.6	6.1
				0.082		5.6	2.5
3.7	2.9			0.168		3.8	2.1
3.7	3.2			0.117			2.2
3.5				0.096			2.7
3.4	3			0.118
3.4	2.7			0.069		7.5	9.2
3.7	2.9			0.108		6.7
3.4	2.6			0.072		6.8	6.7
3.7	3		0.101	0.123		6.9	7.7
3.7	2.6		0.126			5.4	7.9
3.7	3		0.087
4.1	3		0.223				7.8
3.7			0.152	0.085		5.1	7.3
			0.106	0.122		5.7	7
3.8	4.1		0.122	0.126		5.8	6.8
3.6	4.3		0.069	0.118		6.4	7.2
3.9	3.6		0.057	0.128		5.3	7.4
2.9	3.6		0.102	0.165		5.3	6.9
3.7	4.1		0.096	0.09		5.8	6.9
3.4	3.6		0.077	0.146		7.1	9.8
2.9	3.6			0.077			8.3
2.9	3.6			0.109
2.2	3.6			0.116		6.7
3	3.6		0.071	0.129		6.6	7.1
3	4.3		0.091	0.099		6.7	8.1
3	4.2		0.168			5.9
	3.6		0.082			6.4	7.3
	3.5		0.072			6.8
	3.8		0.062				7.3
	3.6		0.055			7.4
			0.128			6.6	7.1
3.9	2.6		0.098			6.5	7.2
3.7	2.6		0.086			8	6.5
3.4	2.8		0.068			7.5	8.4
3.1	2.8		0.074			6.3	6.2
3.5	2.8		0.086			7.8
3.3	2.5		0.102			6.4	8.6
3.3	2.7		0.122				7.5
3.1	2.5		0.1
2.9	2.4
3.2	2.6					1	1.9
3	2.7		0.066	0.079		1.8	3.2
3.3	2.6		0.108	0.075		3.8	4
3.3	2.7		0.102	0.087		5.4	1
3.1	2.5		0.093	0.093			1
3.1	2.6		0.074	0.075			2.7
	2.5		0.068	0.112			1.3
			0.08	0.105			2.1
3.3	2.4		0.078	0.09			3.5
3.4	2.5		0.092	0.159
3.3	2.3		0.091	0.076			3.7
3.4	2.3		0.105	0.047			1.5
3.2	2.2		0.138	0.058		3.4	3.8
3.2	2.4			0.073		4
3.2	2.2			0.082		2.5
3.1	2		0.059			4.6	3.2
3.2	2.3		0.06	0.125		4.4	3
3.2	2.3		0.063	0.118
2.8	2.5		0.087	0.128		5.5	4.7
2.8	2.2		0.073	0.108		2.3	3.7
3.2	2.3		0.094	0.112		1.8	4.7
3.1	2.2		0.131	0.111			2.1
2.9	2.3		0.057	0.113		1.5	3.6
	2.6		0.086	0.143		5.1	0.7
			0.076	0.072
2.7	2		0.112	0.09			2.3
3.3	2.5		0.137	0.043			2
3.2	3.6		0.078	0.154		6.7
3.1	2.5			0.148		3.5	1.9
	2.6			0.132		2.5
	2.7					4.2
	2.4		0.143	0.099		1.8
	2.4		0.137	0.108		1.4
	2.3		0.097	0.099		4
	2.1		0.093	0.142		5.5
	3		0.108	0.105
	2.5		0.137	0.12		1.6
	2.8		0.131	0.08		4.8
2.5			0.094	0.107		5
3.8			0.11	0.119		5.8
2.4	2.1		0.107	0.097
2.9	2.7					5.1
2.8	2.2					1.9
3.8	2.4
2.6	2.5		0.101	0.181
2	2.5		0.071	0.096
3.2	2.8		0.079	0.132
2.6	2.8		0.11	0.144
2.2	1.8		0.097	0.088
2.2	3.1		0.118	0.11
	3.1		0.124	0.146			2.8
	2.8		0.115	0.152			3.9
	3.1		0.084			4.4	4.5
			0.071
2.1			0.078				5.1
2.9						4	5.5
2.8						3.7
3.1						3.8	2.5
3			0.102	0.021			2.3
3.2			0.135	0.049		2.7
3.3			0.074				2.1
3.1			0.131	0.093			6.8
3			0.064	0.116
2.9			0.111	0.08
2.8			0.064	0.131
2.9			0.114	0.119		4.8	3.5
2.3			0.102	0.095		3.7	3
3.1			0.06	0.07		4.2
3.1			0.114	0.112
3.1			0.068				3.5
						7.1	2.5
							3.8
3	4.5		0.083	0.041
4.1	3.4		0.082	0.039		4.1	3
3.5	4.4		0.094	0.047		6.3
3.7	3.6		0.135	0.048		4.7	3.3
4	3		0.045	0.028		5.3	1.6
3.5	4.8		0.151	0.063			4.5
3.1	3.4		0.093	0.061
3.1	3.7		0.114	0.088
3.5	3.8		0.194	0.051			4
3.6	3.5		0.13	0.088		3	3.7
3.5	3.6		0.192	0.071		4.2
3.5	3.9		0.154	0.048			3.1
	4			0.092			2.9
	3.7			0.107		2.8	5.8
				0.075		5.2	5.2
3.5	3.2			0.097		3.1	2.5
3.1	2.4						2.4
2.9	2.4					3.8	3.8
2.7	2.4
2.5	2.5
2.5	2.7		0.106	0.137
2.3	2.9		0.101	0.174
2.9	2.3		0.112	0.109
2.7	3.4		0.167	0.151
2.7	2.4		0.191	0.128		4.9	2.7
2.7	3.6		0.185	0.159			4.8
2.5	2.3		0.147	0.156		3.2	6
2.5	2.2		0.176	0.164		6.5	1.8
	2.4		0.111	0.197		4.9	5.2
			0.076	0.189		3.9
			0.111	0.182		7.2	3.1
			0.189	0.19		5.9	7.3
3.5	3.4		0.193	0.128		3.7
3.3	3.4		0.138	0.151
3	3.4		0.137	0.145
3.2	3.4			0.189
3.6	3.1
3.1	3.6		0.197	0.122
3.5	4		0.131	0.169
3.1	3.4		0.112	0.159
3	2.8		0.161	0.088
3.1	3.5		0.2	0.146
			0.201	0.159
			0.125	0.154
			0.157	0.218
			0.192	0.231
2.5	2.9		0.148	0.209
2.7	2.1		0.187	0.15
2.8	1.8		0.214	0.133
2.4	2.4		0.218	0.124
2.7	2.3		0.171	0.175
2.8	2.2		0.046	0.113
2.4	2.2			0.166
2.4	2.1
2.7
2.5
2.5

## Sheet: 3H
Period			Amplitude			Duty Cycle
WT	KO		WT	KO		WT	KO
3.1	2.95		0.0938	0.0702		0.4076	0.5639
1.0472	2.2429		0.0372	0.0439		0.5701	0.5559
1.9857	2.3143		0.0447	0.062		0.5538	0.5865
2.7167	2.8405		0.0865	0.0518		0.47	0.5589
2.486	2.9604		0.0669	0.0738		0.5332	0.5516
2.05	2.7167		0.079	0.1342		0.4816	0.4457
2.1125	3.4		0.0507	0.1202		0.4512	0.5046
2.0334	2.1126		0.0768	0.064		0.4713	0.526
2.9009	2.86		0.0647	0.1264		0.3573	0.5478
1.7671	2.4714		0.0455	0.0872		0.659	0.575
2.4146	2.8168		0.0635	0.0603		0.5545	0.6203
1.8501	2.1129		0.0875	0.0807		0.5032	0.4822
1.4334	3.5494		0.0497	0.0545		0.5888	0.5282
1.5454	2.96		0.0315	0.0874		0.5775	0.4892
2.5336			0.0534			0.4803
2.2715	2.5715		0.0712	0.049		0.4566	0.6992
2.6501	2.2857		0.0907	0.064		0.5186	0.5444
1.125	3.2		0.0409	0.0613		0.6004	0.4418
1.0176	3.46		0.0385	0.1502		0.5522	0.7804
2.5143			0.0795			0.5729
3.825	2.48		0.1486	0.0781		0.3797	0.5613
2.5667	2.15		0.0399	0.0205		0.587	0.6335
2.1375			0.0374			0.5101
2.5571			0.0632			0.4788
3.1333	2.72		0.1108	0.0896		0.4815	0.6018
1.3583	1.7889		0.0329	0.0585		0.5514	0.507
	2.9399			0.0733			0.5354
	3			0.0972			0.6063
1.72	1.2428		0.0681	0.0656		0.441	0.4117
2.4498	3.3		0.0663	0.0853		0.4233	0.5144
3.3252	3.4602		0.0973	0.1095		0.572	0.4758
2.9334	3.2504		0.1018	0.0909		0.5662	0.5141
2.5859	2.7334		0.0944	0.113		0.4566	0.5586
1.7554	2.3143		0.0785	0.1009		0.5563	0.5198
1.8667	3.32		0.1049	0.1075		0.4021	0.5987
2.5665	3.5603		0.0893	0.1055		0.5588	0.5064
2.1857	3.0402		0.0939	0.1193		0.3823	0.4606
2.4716	2.3251		0.0873	0.0988		0.5949	0.5419
3.0002	3.36		0.1007	0.1214		0.4254	0.5479
2.5834	3.6753		0.1103	0.1451		0.4849	0.4642
1.9556			0.0377			0.5139
0.7458	1.7299		0.0287	0.0387		0.468	0.4665
0.8273	1.78		0.0423	0.0636		0.529	0.4611
1.2286	2.0501		0.0411	0.0872		0.426	0.4774
1.7182	2.2287		0.0579	0.0778		0.4665	0.5054
1.3294	2.5833		0.0644	0.0208		0.4277	0.6243
1.0875			0.0339			0.4536
1.2643	2.0624		0.0319	0.0634		0.459	0.6501
1.6799	1.75		0.0405	0.0494		0.4552	0.5748
	0.915			0.0312			0.6358
	2.6143			0.056			0.6593
	2.4001			0.0437			0.793
	1.7111			0.0449			0.5149
	2			0.0316			0.5269
2.35	3.24		0.0485	0.0868		0.4685	0.4406
2.4571	1.9555		0.0906	0.079		0.5419	0.5545
2.2501	2.9599		0.0702	0.082		0.5679	0.5054
1.85	2.2125		0.06	0.0754		0.6104	0.5073
2.4857	3.475		0.0923	0.1092		0.4976	0.5085
1.77	3.3802		0.0687	0.0925		0.4841	0.6505
1.9778	3.65		0.0854	0.0729		0.5063	0.5762
1.7777	3.825		0.0687	0.0838		0.5455	0.6375
2.325	2.175		0.0719	0.0739		0.5358	0.6206
2.9333	2.3		0.0897	0.0952		0.4875	0.4698
2.3716	3.34		0.0723	0.0755		0.4912	0.4984
1.2077	3.1167		0.0512	0.0991		0.492	0.532
2.4571	2.8835		0.0721	0.0564		0.5295	0.6006
1.65			0.0554			0.4834
3.3799			0.0648			0.5527
1.8667	2.8501		0.0431	0.0725		0.468	0.5428
1.7222	2.98		0.069	0.0769		0.4608	0.5155
1	3.02		0.0617	0.08		0.5155	0.4465
2.875	2.8602		0.074	0.0652		0.4455	0.4272
1.4334	2.9199		0.0547	0.0666		0.4417	0.4653
2.2286	3.2751		0.0487	0.0619		0.4774	0.5617
2.9801	2.7999		0.0388	0.1139		0.455	0.4474
1.475	3.1667		0.0409	0.1014		0.4799	0.5355
1.9375	3.1201		0.0532	0.0814		0.4749	0.4987
1.4308	2.8001		0.051	0.0787		0.3789	0.4534
2.2001	3.3001		0.0525	0.0676		0.4969	0.4015
3.3801	3.2601		0.0804	0.084		0.4213	0.4099
	4.0336			0.1088			0.3595
	3.15			0.0588			0.4903
	2.3501			0.0362			0.4398
	2.2751			0.0376			0.4468

## Sheet: 3I
Delay			Amplitude			Duration				% no oscillations
WT	KO		WT	KO		WT	KO			control	KO
2.7	3		0.127	0.113		1			FOV 1	0	0.555556
3.3	4.2		0.104	0.121		1.8	3		FOV 2	0.166667	0.636364
3.2	4		0.219	0.107		3.8			FOV 3	0.125	0.5
3.1	4.2		0.211	0.143		5.4			FOV 4	0.583333	0.7
	3.8			0.11			2		FOV 5	0.384615	0.454545
	3.3			0.144					FOV 6	0.4	0.5
	3.7			0.09					FOV 7	0.2	0.6
	4.4			0.197			2.7
	4.9			0.156			3.4
			0.101	0.068		3.4
2.5	2.9		0.126			4
3.8			0.087	0.164		2.5	2.1
2.4	2.8		0.223	0.085		4.6	5.1
2.9	2.7		0.152	0.167		4.4
2.8	2.7		0.106	0.108
3.8	2.9		0.122	0.11		5.5	3.4
2.6	3.4		0.069	0.13		2.3
2	3.2		0.057	0.122		1.8
3.2	2.9		0.102	0.081
2.6	3		0.096			1.5
2.2			0.077	0.116		5.1	1.4
2.2	3.5			0.066
	4.3
			0.071	0.106		6.7	6.2
			0.091	0.074		3.5	5.2
2.1	3.2		0.168	0.068		2.5	6
2.9	3.5		0.082	0.031		4.2
2.8	4.1		0.072			1.8
3.1	4.2		0.062	0.071		1.4	4.9
3			0.055	0.035		4
3.2	4.2		0.128	0.078		5.5	4.7
3.3	4.3		0.098	0.091
3.1	3.3		0.086	0.086		1.6
3	3.1		0.068	0.042		4.8
2.9	4.3		0.074			5
2.8	3.7		0.086	0.138		5.8
2.9			0.102	0.206			5
2.3	3		0.122			5.1
3.1	3.5		0.1			1.9
3.1
3.1
			0.066	0.12			4.1
3	4.2		0.108	0.09			5.8
4.1	3.7		0.102	0.098
3.5	4.1		0.093	0.078
3.7	3.9		0.074	0.108		4.4
4	3.8		0.068	0.155			6.1
3.5	3.7		0.08	0.089
3.1	3.3		0.078	0.087		4
3.1	3.2		0.092	0.041		3.7
3.5	3.5		0.091	0.057		3.8
3.6	3.6		0.105
3.5			0.138			2.7
3.5
			0.059	0.061			4.3
			0.06	0.035		4.8	4.6
3.5	3.1		0.063	0.059		3.7
3.1	4.3		0.087	0.088		4.2	4.6
2.9	4.4		0.073	0.103
2.7	2.8		0.094
2.5	2.9		0.131	0.028		7.1
2.5			0.057	0.052
2.3	4.1		0.086	0.085			5.9
2.9	2.7		0.076	0.041		4.1
2.7	3.8		0.112	0.089		6.3	2.4
2.7	2.8		0.137	0.039		4.7	5.6
2.7	2.7		0.078			5.3
2.5	3.1
2.5
3.5	4.5		0.143	0.104		3	4.5
3.3	4.2		0.137	0.046		4.2	4.8
3	3.7		0.097	0.101
3.2	3.7		0.093	0.09
3.6	4.9		0.108	0.04		2.8	5.6
3.1	4.8		0.137	0.098		5.2
3.5	4.8		0.131	0.067		3.1	3.3
3.1	3.7		0.094	0.076			3.3
3	4		0.11	0.098		3.8
3.1	4.6		0.107	0.056
			0.101	0.062		4.9	4.3
2.5	3.5		0.071	0.072
2.7	2.7		0.079	0.058		3.2
2.8	3.1		0.11	0.066		6.5	2.4
2.4	3.4		0.097	0.122		4.9	5.3
2.7	2.8		0.118	0.056		3.9
2.8	3.1		0.124	0.069		7.2	2.2
2.4	3.8		0.115	0.046		5.9
2.4	3.5		0.084	0.064		3.7
2.7	2.9		0.071	0.06
2.5	2.9		0.078
2.5
