# Supplementary material for: β-cell deletion of the PKm1 and PKm2 isoforms of pyruvate kinase in mice reveals their essential role as nutrient sensors for the KATP channel
Source: eLife. 2022 Aug 23;11:e79422. doi: 10.7554/eLife.79422 (PMC9444242; doi:10.7554/eLife.79422)
Supplement: Figure 4—source data 1. [file elife-79422-fig4-data1.xlsx]

## Sheet: 4A
Time [m]	Con			PCK2-ßKO
	Mean	SD	N	Mean	SD	N
10.0056	1.0109	0.009378	62	1.00526	0.008363	65
10.1055	1.00936			1.0042
10.2063	1.00831			1.00359
10.307	1.00917			1.00461
10.4059	1.00858			1.00458
10.5062	1.00788			1.00346
10.6059	1.0077			1.00348
10.7068	1.00738			1.00332
10.8071	1.00768			1.00392
10.9061	1.00684			1.00324
11.0076	1.00711			1.00365
11.1069	1.00668			1.00341
11.206	1.00636			1.00327
11.3072	1.00661			1.00388
11.4062	1.00651			1.00422
11.5058	1.00555			1.00335
11.6058	1.00491			1.00258
11.7064	1.00453			1.00232
11.8061	1.00441			1.0025
11.9061	1.00392			1.00232
12.0061	1.0036			1.00198
12.1071	1.0039			1.00272
12.2068	1.00376			1.00241
12.3062	1.00314			1.00204
12.406	1.00305			1.00237
12.5067	1.0027	0.00329	62	1.00171	0.004557	65
12.6066	1.00236			1.0014
12.7069	1.0022			1.00146
12.8071	1.00234			1.00159
12.9058	1.00258			1.00162
13.0064	1.00191			1.0009
13.1065	1.00213			1.00122
13.2062	1.00167			1.00058
13.3067	1.00166			1.00073
13.4068	1.00174			1.00076
13.5069	1.00179			1.00092
13.6069	1.00114			1.00046
13.7068	1.00073			1.00026
13.8069	1.00091			1.00048
13.9056	0.99997			0.999352
14.0066	0.99994			0.999718
14.1069	0.999944			1.00012
14.2061	0.997376			0.998306
14.3068	0.99772			0.998518
14.4068	0.999354			0.999749
14.5065	0.998568			0.999612
14.6071	0.998546			0.999809
14.7062	0.998198			0.999187
14.8079	0.997993			0.999189
14.9059	0.99872			1.00012
15.0067	0.998859	0.002693	62	1.00035	0.003059	65
15.1059	0.997894			0.999314
15.2072	0.997447			0.999539
15.3077	0.996902			0.999385
15.4063	0.996807			0.999267
15.5068	0.996595			0.999579
15.6061	0.996997			0.999873
15.7067	0.996828			0.999803
15.8058	0.99642			0.999506
15.906	0.99678			1.00008
16.0057	0.995799			1.00005
16.1064	0.995634			0.999864
16.2061	0.995442			0.999748
16.3059	0.995684			1.00028
16.4056	0.996371			1.00087
16.5062	0.996936			1.00164
16.6067	0.998725			1.00353
16.7069	1.0009			1.0055
16.8066	1.00452			1.00941
16.9058	1.01021			1.01348
17.0058	1.01697			1.01933
17.1062	1.02636			1.02656
17.2062	1.03652			1.03521
17.3072	1.04775			1.04484
17.4056	1.05745			1.05343
17.5074	1.06769	0.039355	62	1.06328	0.031984	65
17.6066	1.07596			1.07276
17.707	1.0818			1.08102
17.8056	1.08693			1.0898
17.9058	1.09017			1.09559
18.0072	1.09272			1.10213
18.1074	1.09318			1.10655
18.2078	1.09191			1.11043
18.3068	1.09102			1.11349
18.4065	1.08831			1.1149
18.5068	1.08479			1.114
18.6062	1.0835			1.11365
18.7059	1.08154			1.11321
18.8061	1.07845			1.11189
18.9081	1.0767			1.10958
19.0065	1.07544			1.10767
19.1068	1.07505			1.10755
19.2065	1.07397			1.10599
19.3079	1.07258			1.10352
19.4062	1.07255			1.10225
19.5062	1.0734			1.10173
19.6078	1.07361			1.1007
19.706	1.07394			1.10042
19.8061	1.07497			1.09997
19.9059	1.07736			1.10068
20.0078	1.07845	0.041949	62	1.10015	0.028216	65
20.1069	1.08014			1.10047
20.2066	1.08166			1.10068
20.3058	1.08386			1.10152
20.4078	1.08555			1.10192
20.5075	1.08732			1.10187
20.6073	1.08991			1.10328
20.7072	1.09306			1.10481
20.807	1.09535			1.10594
20.9071	1.09779			1.10787
21.0077	1.09859			1.10765
21.1082	1.10145			1.1096
21.2082	1.10323			1.11063
21.3071	1.10626			1.11285
21.4074	1.10789			1.11469
21.5092	1.10929			1.11506
21.6073	1.11219			1.11741
21.7072	1.11446			1.11946
21.807	1.11725			1.12195
21.9071	1.11853			1.12323
22.0074	1.12059			1.1247
22.1092	1.12308			1.12779
22.208	1.12559			1.13046
22.3079	1.12714			1.13143
22.4081	1.12793			1.1327
22.5076	1.12887	0.065281	62	1.13377	0.048815	65
22.6071	1.13005			1.13575
22.7082	1.1322			1.13741
22.8056	1.13316			1.13931
22.9079	1.13615			1.14246
23.0075	1.13862			1.14469
23.1078	1.13987			1.14607
23.2079	1.14075			1.14754
23.3076	1.142			1.14846
23.4086	1.14205			1.14954
23.5077	1.14362			1.15191
23.6087	1.14397			1.15214
23.7063	1.14492			1.15387
23.8083	1.14618			1.15594
23.9067	1.14827			1.15798
24.0064	1.14913			1.15966
24.1059	1.14947			1.15998
24.2062	1.15104			1.16229
24.3059	1.15251			1.16439
24.4066	1.1525			1.16493
24.5073	1.15385			1.16654
24.6072	1.1549			1.16818
24.7066	1.15516			1.16876
24.8077	1.15558			1.16992
24.9065	1.15615			1.17087
25.0062	1.1579	0.070965	62	1.17239	0.054337	65
25.1058	1.15883			1.17488
25.2057	1.15937			1.17521
25.3068	1.16007			1.17759
25.4063	1.16145			1.17776
25.5065	1.16103			1.17816
25.6069	1.16162			1.17878
25.7066	1.16294			1.1802
25.8069	1.16157			1.18043
25.9061	1.1635			1.18215
26.007	1.16426			1.18269
26.1071	1.16449			1.18373
26.2064	1.16584			1.18531
26.307	1.1656			1.18515
26.4067	1.16707			1.18661
26.507	1.16618			1.1859
26.6072	1.16549			1.18614
26.7069	1.16694			1.18772
26.807	1.16613			1.18694
26.9069	1.16776			1.189
27.006	1.16897			1.18924
27.1068	1.16922			1.19058
27.2077	1.16976			1.19063
27.3067	1.17016			1.19179
27.4068	1.17093			1.19296
27.5067	1.17078	0.071765	62	1.19208	0.055001	65
27.606	1.17004			1.1921
27.7071	1.17026			1.19217
27.8066	1.17103			1.19308
27.9067	1.17167			1.1926
28.0069	1.17076			1.19186
28.108	1.17033			1.19047
28.2063	1.17062			1.19062
28.3059	1.17045			1.19056
28.4062	1.16969			1.19221
28.5058	1.17157			1.19396
28.6065	1.17163			1.19331
28.7069	1.17086			1.19317
28.8069	1.17116			1.19473
28.9067	1.1717			1.19352
29.0072	1.17082			1.19429
29.1099	1.17123			1.19451
29.2062	1.16903			1.19386
29.3063	1.16976			1.19371
29.4069	1.17096			1.19747
29.5062	1.17085			1.19639
29.6069	1.17061			1.19701
29.707	1.17147			1.19715
29.8057	1.17071			1.19621
29.9063	1.17032			1.19541
30.0066	1.17035	0.066297	62	1.1969	0.04948	65

## Sheet: 4B
Time [s]	Con			PKM1-ßKO
	Mean	SD	N	Mean	SD	N
10.0073	1.00326	0.007098	92	1.00399	0.006291	88
10.1059	1.00316			1.00402
10.2061	1.00307			1.00386
10.3064	1.00314			1.00398
10.4061	1.00285			1.00366
10.5061	1.00277			1.00374
10.606	1.00256			1.0033
10.7058	1.0028			1.00356
10.8062	1.00276			1.00369
10.9062	1.00268			1.0034
11.006	1.00257			1.00326
11.1061	1.00228			1.00288
11.2065	1.00214			1.00276
11.3063	1.00217			1.00278
11.4067	1.00175			1.00229
11.5063	1.00167			1.00223
11.6062	1.00186			1.00223
11.707	1.00205			1.00236
11.8073	1.00215			1.00244
11.9073	1.00224			1.00271
12.0069	1.00219			1.00264
12.1067	1.0018			1.0018
12.2073	1.00148			1.00153
12.3069	1.00138			1.00162
12.4058	1.00141			1.00175
12.5062	1.00098	0.002411	92	1.00099	0.00242	88
12.6066	1.00069			1.00079
12.706	1.00054			1.00061
12.8056	1.00096			1.00105
12.9059	1.00074			1.00076
13.0059	1.00066			1.0008
13.1058	1.00057			1.0005
13.2064	1.00063			1.0007
13.3063	0.999813			1.00009
13.4058	1.00012			1.00024
13.5077	0.999909			1.00022
13.6072	1.00008			1.0004
13.7058	1.0003			1.00051
13.806	0.999728			0.999839
13.906	0.999987			1.00007
14.0061	1.00001			0.999905
14.1062	0.99992			1.00002
14.2065	0.999791			0.999611
14.3062	1.00005			0.9998
14.4057	0.999978			0.999799
14.5056	1.00002			0.999947
14.6061	0.999766			0.999554
14.708	0.999565			0.999323
14.8062	0.999478			0.999422
14.9062	0.999631			0.999243
15.007	0.999387	0.001815	92	0.999044	0.001919	88
15.1061	0.999597			0.999252
15.2064	0.999384			0.999039
15.306	0.999069			0.998679
15.4066	0.9993			0.99881
15.5064	0.999122			0.998553
15.6059	0.998865			0.99836
15.7065	0.998357			0.997785
15.8056	0.99836			0.997701
15.9067	0.997429			0.996889
16.0067	0.997507			0.997209
16.1066	0.99734			0.99679
16.2065	0.997185			0.99663
16.3066	0.997417			0.996768
16.4067	0.998209			0.997393
16.5057	0.999861			0.998649
16.6057	1.00314			1.00183
16.707	1.00744			1.00609
16.806	1.01406			1.01251
16.9075	1.02223			1.02023
17.0059	1.0318			1.02936
17.1064	1.0435			1.04066
17.2059	1.05708			1.05306
17.3061	1.07134			1.06632
17.4064	1.08537			1.07868
17.5064	1.09824	0.052877	92	1.09011	0.04783	88
17.6064	1.11002			1.10047
17.7055	1.11957			1.10904
17.8066	1.12554			1.11438
17.9069	1.12937			1.11876
18.0065	1.13059			1.11994
18.1058	1.12948			1.11936
18.2058	1.12672			1.11729
18.3066	1.1237			1.11447
18.4059	1.11967			1.11075
18.5066	1.11576			1.10713
18.606	1.11176			1.10316
18.7056	1.10882			1.09981
18.8062	1.10642			1.09731
18.9062	1.10372			1.09459
19.0058	1.10196			1.09305
19.106	1.10179			1.09255
19.2065	1.10083			1.09168
19.3066	1.099			1.08967
19.406	1.09915			1.08955
19.5057	1.09956			1.08965
19.6057	1.10058			1.09029
19.706	1.10165			1.09112
19.806	1.10297			1.09222
19.9062	1.10426			1.09301
20.0062	1.10626	0.046818	92	1.0948	0.040972	88
20.1059	1.10838			1.09658
20.2058	1.11115			1.09905
20.3063	1.11349			1.10106
20.4068	1.1157			1.10309
20.5061	1.1184			1.10545
20.6063	1.12089			1.1075
20.7062	1.12275			1.10908
20.8063	1.12476			1.11125
20.9065	1.12782			1.11418
21.0068	1.13123			1.11652
21.1065	1.13435			1.11984
21.2057	1.13658			1.12164
21.3068	1.13928			1.12399
21.4067	1.1414			1.12605
21.5072	1.14431			1.12881
21.6056	1.14711			1.13128
21.7062	1.14946			1.13384
21.8064	1.15192			1.13626
21.9063	1.15528			1.13919
22.0066	1.15756			1.14128
22.1063	1.15947			1.14347
22.2063	1.1618			1.14584
22.3058	1.16422			1.14819
22.4068	1.16581			1.14958
22.5063	1.16689	0.060779	92	1.15108	0.054146	88
22.6057	1.16922			1.15325
22.7062	1.17128			1.15518
22.8067	1.17413			1.15792
22.9068	1.17551			1.15943
23.0071	1.17757			1.16116
23.1059	1.1785			1.16269
23.2067	1.17976			1.16375
23.307	1.18119			1.16539
23.4075	1.1827			1.167
23.5075	1.1837			1.16793
23.6059	1.18492			1.16929
23.7071	1.18668			1.17077
23.8073	1.18826			1.17252
23.9077	1.18958			1.17378
24.0078	1.19127			1.17559
24.1074	1.19158			1.17599
24.2078	1.19306			1.17721
24.3082	1.19453			1.17881
24.4087	1.19535			1.17962
24.5077	1.19568			1.18025
24.6071	1.19637			1.18097
24.7065	1.19759			1.1819
24.8067	1.19883			1.1828
24.9073	1.2005			1.18472
25.0073	1.20069	0.07002	92	1.18531	0.060931	88
25.1073	1.20169			1.18604
25.2058	1.20156			1.18591
25.3068	1.20206			1.18624
25.4077	1.20253			1.18682
25.5068	1.2049			1.18941
25.6075	1.20571			1.18945
25.7056	1.20608			1.19045
25.8059	1.20746			1.19145
25.9074	1.20799			1.19194
26.0065	1.20955			1.19328
26.1061	1.21001			1.19404
26.208	1.21098			1.19453
26.307	1.21209			1.19494
26.4082	1.21275			1.19635
26.5063	1.21306			1.19691
26.6063	1.21432			1.19763
26.7063	1.21451			1.19789
26.8066	1.21595			1.19899
26.906	1.2146			1.19784
27.0062	1.21547			1.19808
27.1072	1.21663			1.19937
27.206	1.21623			1.19945
27.3065	1.2176			1.20014
27.4068	1.21764			1.20108
27.506	1.21825	0.075598	92	1.20166	0.065138	88
27.6057	1.21953			1.20212
27.7061	1.21926			1.20232
27.8064	1.22086			1.20401
27.9064	1.22142			1.20485
28.0066	1.22197			1.20467
28.1061	1.22161			1.2045
28.2071	1.22209			1.20497
28.3067	1.22078			1.20484
28.4063	1.22073			1.20359
28.5066	1.21959			1.20337
28.6067	1.22037			1.20361
28.7063	1.22098			1.20389
28.8061	1.2207			1.20437
28.9069	1.2218			1.20537
29.0064	1.22216			1.20516
29.1066	1.22344			1.2072
29.2066	1.2239			1.20696
29.3059	1.22554			1.20881
29.4071	1.2248			1.20766
29.5071	1.22513			1.20803
29.6065	1.22506			1.20827
29.706	1.22544			1.20799
29.8071	1.22545			1.20846
29.9068	1.22525			1.20867
30.0073	1.22562	0.07725	92	1.20858	0.066742	88

## Sheet: 4C
Time [m]	Con			PKM2-ßKO
	Mean	SD	N	Mean	SD	N
10.056	1.00697	0.012864	90	1.00761	0.011269	86
10.157	1.00822			1.00873
10.2562	1.00824			1.00867
10.3575	1.00734			1.00773
10.4556	1.00724			1.00756
10.5567	1.00691			1.00701
10.6578	1.00671			1.00675
10.7573	1.00638			1.00644
10.8559	1.00732			1.00805
10.9563	1.00578			1.00581
11.0559	1.00561			1.00556
11.1562	1.0057			1.00573
11.2573	1.00523			1.00505
11.3575	1.00552			1.00506
11.4566	1.00548			1.00531
11.5566	1.00529			1.00499
11.6579	1.00537			1.00492
11.758	1.00524			1.00484
11.858	1.00523			1.00467
11.9565	1.00505			1.00477
12.0566	1.00512			1.00496
12.1577	1.00477			1.00461
12.2569	1.00449			1.00426
12.3567	1.00401			1.00362
12.4566	1.0037			1.00334
12.5566	1.0037	0.005609	90	1.0036	0.004908	86
12.6569	1.00327			1.00307
12.7569	1.00323			1.00298
12.8572	1.00318			1.00302
12.9568	1.00299			1.00268
13.056	1.00217			1.00179
13.1567	1.00103			1.00072
13.2565	1.00093			1.00082
13.357	1.00085			1.00086
13.4558	1.00066			1.00078
13.5552	1.00053			1.00029
13.656	1.0002			0.999966
13.7554	0.999601			0.999759
13.8554	0.99991			0.999889
13.9559	0.9982			0.998265
14.0554	0.999639			0.999593
14.1553	0.999397			0.999421
14.2556	0.999389			0.999287
14.3555	0.99899			0.999241
14.4555	0.998697			0.998945
14.5555	0.998942			0.999005
14.6555	1.00089			1.00074
14.7557	1.00058			1.00052
14.8557	1.00061			1.00081
14.9559	0.998792			0.999291
15.0554	0.998542	0.00474	90	0.998868	0.004166	86
15.1559	0.998358			0.998627
15.2559	0.998223			0.998551
15.3561	0.998337			0.998812
15.4553	0.998101			0.998612
15.5556	0.997793			0.998195
15.6556	0.997238			0.997686
15.7566	0.997229			0.997916
15.8558	0.997166			0.997866
15.9555	0.998384			0.999044
16.0554	0.99702			0.997689
16.1557	0.99732			0.998018
16.2557	0.997336			0.99826
16.3558	0.998183			0.999041
16.4559	0.999027			1.00029
16.5556	1.0004			1.00182
16.6554	1.00323			1.00466
16.7559	1.00727			1.00884
16.8558	1.01266			1.01443
16.9558	1.0199			1.02181
17.0557	1.02852			1.03021
17.1561	1.03755			1.03913
17.2569	1.04754			1.04876
17.3557	1.05697			1.05797
17.4556	1.06593			1.06641
17.5557	1.07392	0.052672	90	1.07412	0.056904	86
17.656	1.08084			1.08096
17.7555	1.0873			1.08718
17.8559	1.09192			1.09224
17.9566	1.09641			1.09695
18.0555	1.09937			1.10053
18.1554	1.10228			1.10359
18.256	1.10413			1.10588
18.356	1.1042			1.10648
18.4555	1.1048			1.10752
18.5554	1.10476			1.10814
18.6579	1.10375			1.10774
18.7562	1.10282			1.107
18.8556	1.10131			1.10569
18.9556	1.09909			1.10436
19.0558	1.097			1.10291
19.1556	1.09528			1.1015
19.2555	1.0933			1.10003
19.3566	1.0911			1.09827
19.4555	1.08933			1.09721
19.5555	1.08861			1.09682
19.6557	1.08764			1.09644
19.7558	1.08747			1.09628
19.8559	1.08823			1.09744
19.9565	1.08906			1.09854
20.0554	1.0902	0.034294	90	1.09965	0.040727	86
20.1556	1.09197			1.10164
20.2564	1.09339			1.10297
20.3556	1.09491			1.10445
20.4567	1.0969			1.10677
20.5555	1.09902			1.10879
20.6558	1.10133			1.11086
20.7558	1.10337			1.11271
20.8561	1.10494			1.11431
20.9554	1.10708			1.11607
21.0554	1.10876			1.11709
21.1556	1.10964			1.11779
21.2559	1.11158			1.11929
21.356	1.1136			1.12103
21.4558	1.11505			1.12191
21.5561	1.11679			1.12291
21.6558	1.1181			1.1237
21.7567	1.11925			1.12392
21.8565	1.11977			1.12399
21.9562	1.12068			1.12475
22.0559	1.12243			1.12539
22.1567	1.12321			1.12564
22.2561	1.12426			1.12621
22.357	1.12536			1.12696
22.4557	1.12646			1.12777
22.5559	1.12705	0.062479	90	1.12833	0.06496	86
22.6553	1.12728			1.12872
22.7567	1.12767			1.12895
22.8567	1.12805			1.12962
22.9555	1.12866			1.13041
23.0573	1.1296			1.13156
23.1554	1.12987			1.13179
23.2554	1.13067			1.13317
23.3557	1.13103			1.13322
23.4556	1.13195			1.13478
23.5554	1.13331			1.1359
23.6553	1.1336			1.13648
23.7562	1.13414			1.13764
23.8564	1.13484			1.13838
23.9558	1.13543			1.13895
24.056	1.13521			1.13904
24.1565	1.13595			1.14027
24.2564	1.13678			1.14084
24.3573	1.13753			1.14195
24.457	1.1394			1.14405
24.5555	1.14023			1.14528
24.6554	1.14131			1.1463
24.7568	1.14155			1.14708
24.8559	1.14218			1.14813
24.9561	1.14311			1.14874
25.0553	1.14389	0.068822	90	1.15	0.070304	86
25.1558	1.14525			1.15122
25.2555	1.14577			1.1526
25.3576	1.14728			1.1539
25.456	1.14815			1.155
25.5557	1.14857			1.15497
25.6559	1.14973			1.15631
25.7566	1.15061			1.15701
25.856	1.1515			1.15818
25.9556	1.15215			1.15888
26.0556	1.15259			1.15934
26.1556	1.1531			1.15975
26.2556	1.15371			1.16054
26.3558	1.15411			1.16091
26.4559	1.15466			1.16131
26.5558	1.15529			1.16237
26.6562	1.15548			1.16203
26.7557	1.15585			1.16303
26.8568	1.15666			1.1633
26.9564	1.1563			1.16336
27.0554	1.15652			1.16381
27.1574	1.15729			1.16388
27.2575	1.15752			1.16471
27.3571	1.16029			1.16707
27.4583	1.16066			1.16781
27.5578	1.16077	0.071096	90	1.16831	0.073083	86
27.6573	1.16105			1.16822
27.7575	1.1616			1.16875
27.8575	1.15848			1.1659
27.9582	1.15859			1.16668
28.0562	1.15924			1.16693
28.1561	1.15902			1.16685
28.2561	1.1587			1.16678
28.3571	1.16142			1.16901
28.4567	1.15905			1.16718
28.557	1.15901			1.16728
28.656	1.15936			1.16752
28.756	1.15958			1.16813
28.8566	1.15967			1.16769
28.9565	1.15953			1.16737
29.0565	1.16007			1.16851
29.1564	1.16075			1.16909
29.2564	1.16074			1.16846
29.357	1.16001			1.16845
29.4571	1.1605			1.16805
29.5572	1.16134			1.16922
29.6569	1.15989			1.16746
29.7566	1.15998			1.16773
29.8577	1.16			1.16758
29.9575	1.16056			1.16848
30	1.16045	0.071832	90	1.16821	0.074629	86

## Sheet: 4D
Average Traces
Time [m]	WT -Pka			KO -Pka
	Mean	SD	N	Mean	SD	N
0.006217	1.11619	0.043869	60	1.07732	0.038564	46
0.126917	1.11452			1.07472
0.226867	1.10992			1.07156
0.326383	1.10955			1.07219
0.426583	1.10501			1.06785
0.526667	1.1005			1.06612
0.626933	1.09657			1.06331
0.726617	1.09733			1.06373
0.8275	1.09696			1.06388
0.926933	1.09442			1.0628
1.02672	1.09709			1.06512
1.12847	1.09396			1.0618
1.22837	1.09481			1.0626
1.32828	1.0959			1.06431
1.42823	1.09342			1.06116
1.52813	1.09221			1.06032
1.62828	1.09233			1.0599
1.7285	1.09253			1.0609
1.82832	1.0915			1.06015
1.92797	1.08905			1.05721
2.02697	1.08665			1.05582
2.12693	1.08445			1.05367
2.227	1.08363			1.05399
2.32697	1.08347			1.05404
2.42695	1.08154			1.05177
2.52838	1.07903	0.036474	60	1.04985	0.027199	46
2.62825	1.0784			1.04957
2.72828	1.0737			1.04506
2.8275	1.0741			1.04553
2.92702	1.07222			1.04487
3.02695	1.0677			1.03977
3.12725	1.06614			1.03832
3.22685	1.0664			1.03962
3.3267	1.06588			1.03939
3.42807	1.06556			1.03864
3.52665	1.06484			1.03842
3.63605	1.06435			1.03899
3.73617	1.06107			1.03524
3.83475	1.05874			1.03194
3.93373	1.0568			1.03048
4.0291	1.05609			1.02953
4.12778	1.05291			1.0266
4.22645	1.05583			1.03009
4.3282	1.05229			1.02585
4.42667	1.05114			1.02486
4.5265	1.05099			1.02536
4.62797	1.05027			1.02382
4.72695	1.04921			1.02269
4.82808	1.05127			1.02481
4.92695	1.04791			1.02145
5.02757	1.05581	0.030995	74	1.02187	0.020204	59
5.12665	1.05522			1.0216
5.2262	1.05178			1.0177
5.3286	1.05101			1.01683
5.43343	1.05222			1.01837
5.54032	1.04885			1.01513
5.63038	1.04897			1.01561
5.72783	1.0498			1.01631
5.8275	1.0473			1.013
5.92718	1.04892			1.01505
6.03612	1.04736			1.0137
6.12883	1.04628			1.0123
6.22775	1.04589			1.01134
6.33	1.04661			1.01212
6.428	1.04657			1.01308
6.52763	1.04595			1.01205
6.62735	1.04573			1.01166
6.72723	1.04503			1.01175
6.82778	1.04416			1.00978
6.92887	1.0444			1.011
7.0329	1.04504			1.0117
7.12668	1.04286			1.00759
7.22907	1.04369			1.01067
7.32908	1.04625			1.01389
7.42825	1.04479			1.01242
7.52913	1.04827	0.027196	74	1.01655	0.016278	59
7.62848	1.04468			1.01255
7.72713	1.04894			1.01771
7.82833	1.04707			1.01516
7.9275	1.04558			1.01476
8.02738	1.04937			1.01849
8.12977	1.04602			1.01524
8.22785	1.04609			1.0152
8.32752	1.04516			1.01474
8.4293	1.04581			1.01502
8.52778	1.04392			1.01293
8.62833	1.04624			1.01533
8.73018	1.04463			1.01425
8.8303	1.04895			1.0169
8.92853	1.04761			1.01044
9.02757	1.04597			1.00933
9.12908	1.04439			1.00746
9.22887	1.04661			1.00897
9.33035	1.04689			1.01111
9.42767	1.04571			1.00917
9.52822	1.04302			1.00774
9.6275	1.04219			1.00436
9.7275	1.0406			1.00435
9.82827	1.04257			1.00544
9.93563	1.04136			1.00437
10.047	1.04239	0.024213	89	1.00523	0.022677	76
10.1477	1.0428			1.006
10.2456	1.0403			1.00499
10.3449	1.04073			1.00177
10.436	1.04094			1.00596
10.5373	1.04008			1.00406
10.6331	1.03897			1.00301
10.7285	1.03974			1.00307
10.8287	1.03752			1.00188
10.9275	1.03818			1.00283
11.029	1.04014			1.00446
11.1316	1.04068			1.00626
11.2641	1.03812			1.0034
11.3617	1.03855			1.00316
11.4586	1.03655			1.00175
11.5573	1.03788			1.00422
11.6539	1.03814			1.00432
11.7469	1.03753			1.00333
11.8435	1.03591			1.00232
11.9405	1.03675			1.00341
12.0416	1.03414			1.00044
12.1401	1.03552			1.00221
12.2374	1.03571			1.00373
12.3292	1.03579			1.00286
12.4281	1.03219			1.00134
12.5288	1.03407	0.019214	89	1.00166	0.019333	76
12.6291	1.03197			1.00088
12.7278	1.03428			1.00245
12.8302	1.03551			1.0045
12.9272	1.03474			1.00428
13.0272	1.03322			1.00357
13.1273	1.03236			1.00262
13.2298	1.03021			1.00094
13.332	1.03111			1.00092
13.4301	1.03102			1.00248
13.5289	1.03035			1.00253
13.629	1.03123			1.00284
13.7291	1.02999			1.00255
13.8287	1.02898			1.00169
13.9292	1.03011			1.00358
14.0304	1.03003			1.004
14.1301	1.02828			1.00102
14.2309	1.0296			1.00229
14.3351	1.02808			1.00296
14.4318	1.02847			1.00336
14.5308	1.02851			1.00258
14.6276	1.02713			1.00168
14.7271	1.02783			1.00242
14.8272	1.02712			1.0023
14.9283	1.02606			1.00138
15.0291	1.02557	0.015137	89	1.00145	0.013093	76
15.1294	1.02647			1.00277
15.2299	1.0265			1.00261
15.3291	1.02435			1.00175
15.4282	1.02361			1.00159
15.5294	1.02398			1.00121
15.6305	1.02421			1.00305
15.7314	1.02348			1.00214
15.8287	1.02557			1.00391
15.9272	1.02285			1.00178
16.0276	1.02316			1.00235
16.129	1.02277			1.00254
16.2296	1.02184			1.00237
16.3275	1.02052			1.00026
16.4293	1.02018			1.00107
16.5312	1.02005			1.00114
16.6299	1.02072			1.00225
16.7298	1.02109			1.00224
16.8304	1.01996			1.00198
16.9276	1.02082			1.0035
17.0273	1.0205			1.00286
17.1272	1.01734			1.00078
17.2281	1.01694			0.999885
17.3291	1.02011			1.00459
17.4276	1.01724			1.00104
17.5292	1.01561	0.010786	89	1.00093	0.008855	76
17.6292	1.01476			0.999135
17.7292	1.0173			1.00136
17.8273	1.01686			1.00247
17.9277	1.01659			1.0023
18.0298	1.01545			1.00124
18.1272	1.01632			1.00224
18.2285	1.01576			1.0038
18.3275	1.01667			1.00298
18.4296	1.01437			1.00261
18.5292	1.01368			1.00135
18.6305	1.01622			1.0033
18.7279	1.0129			1.00149
18.829	1.01321			1.00246
18.9287	1.01395			1.00234
19.0292	1.01353			1.003
19.1288	1.01308			1.00381
19.2274	1.01265			1.00188
19.3271	1.01185			1.00264
19.4278	1.01082			1.00103
19.5278	1.0097			1.00083
19.6288	1.01199			1.00229
19.7276	1.01089			1.00117
19.8286	1.0089			1.00062
19.9276	1.01099			1.00249
20.0277	1.00954	0.007017	89	1.0016	0.005671	76
20.1297	1.01184			1.00374
20.2269	1.01026			1.00267
20.3275	1.00894			1.00194
20.4286	1.0095			1.00408
20.5276	1.00994			1.00214
20.6275	1.01035			1.00406
20.7278	1.00913			1.00476
20.8285	1.00914			1.00293
20.9286	1.00829			1.00278
21.0301	1.01071			1.005
21.1284	1.00818			1.00336
21.2277	1.00894			1.00311
21.3296	1.00842			1.00386
21.4289	1.00776			1.00372
21.5275	1.00713			1.00223
21.6291	1.00618			1.00198
21.728	1.00609			1.00163
21.8277	1.00533			1.00236
21.9277	1.00559			1.00092
22.0291	1.00399			1.00143
22.1302	1.00475			1.00094
22.2291	1.00552			1.0015
22.3294	1.00321			1.00151
22.4305	1.0034			1.00148
22.5282	1.00353	0.002366	89	1.00054	0.002179	76
22.6281	1.00362			1.00109
22.729	1.00271			1.00025
22.8303	1.00382			1.00119
22.9276	1.00177			1.00081
23.0276	1.00286			1.00145
23.1275	1.00011			0.99895
23.2281	1.00413			1.00179
23.329	1.00205			1.00111
23.4276	1.0019			1.0007
23.5272	1.00164			1.00104
23.6279	0.998484			0.999031
23.7286	1.00049			0.999269
23.8286	1.00013			0.999653
23.9275	0.999963			0.999933
24.0298	0.999277			0.999958
24.1301	0.999594			1.00011
24.2289	0.997576			0.997376
24.3315	0.998788			0.99998
24.4278	0.999366			1.00076
24.5293	0.997186			0.998812
24.6286	0.998965			0.999624
24.7288	0.997952			0.999906
24.8281	1.00078			1.00082
24.9279	0.998204			1.00022
25.0303	0.996692	0.002558	89	0.998995	0.00242	76
25.1274	0.996799			0.998506
25.2299	0.996635			0.998691
25.3281	0.996132			0.99817
25.4284	0.997215			0.998805
25.5279	0.997861			1.00095
25.6303	0.995478			0.997128
25.7304	0.997029			0.998051
25.8282	0.995915			0.998005
25.9295	0.996183			0.996466
26.0282	0.993926			0.993998
26.1307	0.995033			0.992196
26.2306	0.997259			0.992139
26.3286	0.998271			0.991561
26.4311	1.0005			0.989614
26.5297	1.00272			0.987311
26.6272	1.00574			0.987281
26.7298	1.00847			0.983669
26.829	1.0121			0.981824
26.9299	1.01795			0.981893
27.0307	1.02319			0.981589
27.1309	1.02896			0.980126
27.2279	1.03565			0.980842
27.3278	1.04394			0.982421
27.4319	1.04958			0.98251
27.5275	1.05805	0.028009	89	0.983017	0.021593	76
27.6293	1.06616			0.98504
27.7285	1.07034			0.985297
27.8289	1.07848			0.986419
27.9275	1.08521			0.989069
28.0291	1.09247			0.990291
28.1278	1.0986			0.993572
28.2379	1.10384			0.995377
28.3389	1.11207			0.998151
28.4526	1.1177			1.00091
28.5491	1.11957			1.00183
28.6443	1.12705			1.00571
28.7543	1.13227			1.00758
28.8463	1.13678			1.01064
28.9418	1.14193			1.01365
29.0446	1.14678			1.01618
29.1413	1.14835			1.01816
29.2398	1.15325			1.02117
29.3377	1.15728			1.02305
29.4298	1.15946			1.02465
29.5294	1.16603			1.02945
29.6286	1.16777			1.03213
29.7281	1.17042			1.03296
29.83	1.1731			1.03485
29.9298	1.17563			1.03646
30.0293	1.17833	0.066319	89	1.03854	0.041452	76
30.1279	1.17992			1.04112
30.2292	1.18269			1.04237
30.3275	1.18574			1.04575
30.4295	1.18729			1.04733
30.5294	1.18901			1.04959
30.629	1.19152			1.05089
30.7295	1.19246			1.05216
30.829	1.19404			1.05362
30.9278	1.19616			1.05502
31.0279	1.19756			1.05683
31.1293	1.20069			1.05938
31.2279	1.20159			1.06111
31.3285	1.20306			1.06345
31.4279	1.20634			1.06495
31.5291	1.20661			1.06491
31.6286	1.20745			1.06681
31.7299	1.20563			1.06524
31.8285	1.20738			1.06818
31.9283	1.20979			1.06879
32.0294	1.20858			1.07039
32.1282	1.21291			1.07251
32.2291	1.21279			1.07306
32.3291	1.21686			1.07742
32.4293	1.21418			1.076
32.5286	1.21486	0.070269	89	1.07555	0.041534	76
32.6289	1.21705			1.07811
32.7303	1.21982			1.08054
32.8288	1.21753			1.07921
32.9313	1.21825			1.08122
33.0305	1.21922			1.08161
33.1281	1.21845			1.08103
33.2295	1.21934			1.084
33.3281	1.22022			1.08347
33.4278	1.22227			1.08625
33.5279	1.22033			1.08546
33.6276	1.22167			1.08613
33.7276	1.2196			1.08443
33.8297	1.2218			1.08639
33.9282	1.22221			1.08811
34.0281	1.22107			1.08712
34.1278	1.22066			1.08758
34.2274	1.22161			1.08831
34.328	1.22125			1.08794
34.4285	1.22192			1.08848
34.5282	1.22198			1.08948
34.6283	1.22034			1.08747
34.7286	1.22122			1.08945
34.8287	1.22123			1.08932
34.928	1.22182			1.09103
35.028	1.21853	0.072699	89	1.08915	0.039046	76
35.1276	1.22137			1.08935
35.2291	1.21966			1.08952
35.3283	1.2209			1.08977
35.4273	1.22144			1.09158
35.5288	1.22157			1.09192
35.628	1.22174			1.09084
35.7278	1.22213			1.09187
35.8287	1.22094			1.09162
35.9278	1.22077			1.09119
36.028	1.22166			1.09159
36.1283	1.22137			1.09295
36.2285	1.22039			1.09118
36.3297	1.22194			1.092
36.4284	1.22295			1.09409
36.5279	1.22081			1.09255
36.6282	1.22344			1.09317
36.7278	1.22192			1.09258
36.828	1.22222			1.09328
36.9275	1.22203			1.09367
37.0277	1.22118			1.09324
37.1278	1.22221			1.09221
37.2283	1.2227			1.09341
37.3297	1.21985			1.09162
37.4298	1.22356			1.09363
37.5278	1.22222	0.082578	89	1.09303	0.040042	76
37.629	1.22249			1.09213
37.7278	1.22103			1.09207
37.8283	1.22371			1.09248
37.9294	1.22455			1.0952
38.0291	1.22374			1.09374
38.1279	1.22584			1.09474
38.2276	1.22485			1.09411
38.3288	1.22527			1.09465
38.4297	1.22457			1.09384
38.5291	1.22505			1.09448
38.629	1.22552			1.09396
38.728	1.22593			1.09451
38.828	1.22495			1.09241
38.9293	1.22865			1.09566
39.0278	1.22661			1.09557
39.1281	1.2263			1.0937
39.2285	1.22675			1.0938
39.3304	1.22734			1.0941
39.4286	1.22707			1.09426
39.5301	1.22815			1.09457
39.6277	1.22799			1.09403
39.7289	1.22621			1.09267
39.8292	1.22667			1.09237
39.9281	1.22972			1.0942
40.0278	1.22866	0.090832	89	1.09421	0.042892	76
40.1281	1.22968			1.09528
40.2285	1.2402			1.10068
40.333	1.24453			1.10381
40.4331	1.24995			1.10454
40.5334	1.24916			1.10444
40.6339	1.25557			1.1098
40.7902	1.25273			1.10682
40.8888	1.25179			1.10714
40.9837	1.2514			1.10646
41.0821	1.25447			1.10846
41.1893	1.2538			1.10767
				1.09605
				1.09457
				1.09707
				1.09559
				1.09221
				1.0965
				1.09421
				1.09624
				1.09267
				1.09416
				1.09501
				1.09299
				1.09247
		0.081773	45	1.09541	0.037967	25

## Sheet: 4E
Average Traces
Time [m]	WT			KO
	Mean	SD	N	Mean	SD	N
0.0307	1.02414	0.033119	50	1.00557	0.031639	43
0.129067	1.05025			1.03834
0.235833	1.05269			1.04059
0.329167	1.05111			1.03821
0.43415	1.04947			1.03666
0.528817	1.04915			1.03624
0.6961	1.0477			1.03519
0.771433	1.04745			1.03406
0.846633	1.049			1.0353
0.945917	1.05129			1.03344
1.03018	1.04865			1.03398
1.13782	1.04669			1.03229
1.2298	1.0444			1.02991
1.35282	1.04564			1.02936
1.42965	1.04595			1.02985
1.53358	1.04764			1.03089
1.65003	1.04891			1.03158
1.73202	1.05012			1.03296
1.86402	1.05054			1.03344
1.93695	1.04623			1.02849
2.03863	1.04451			1.02686
2.13347	1.06383			1.0532
2.23788	1.06164			1.05135
2.32957	1.06136			1.05168
2.43043	1.0599			1.05064
2.53088	1.06077	0.046531	50	1.04985	0.039666	43
2.63068	1.05839			1.04962
2.7297	1.05719			1.04737
2.83127	1.05635			1.04579
2.93143	1.05512			1.04573
3.0295	1.05367			1.04424
3.13022	1.05318			1.0427
3.2299	1.05344			1.04469
3.33083	1.05185			1.04288
3.4316	1.05287			1.04405
3.5314	1.05205			1.04363
3.63158	1.05159			1.04322
3.73127	1.04803			1.04038
3.83108	1.04815			1.04074
3.9313	1.04862			1.04113
4.0314	1.04936			1.04148
4.13132	1.04797			1.04019
4.23135	1.04727			1.03941
4.331	1.04856			1.038
4.43193	1.04883			1.03669
4.52935	1.04773			1.03603
4.62927	1.04973			1.03698
4.72918	1.04812			1.0349
4.83003	1.04719			1.03474
4.92938	1.04644			1.03386
5.03082	1.04686	0.040835	50	1.03397	0.02842	43
5.1309	1.04539			1.03233
5.23158	1.04064			1.03025
5.33117	1.03665			1.02929
5.42945	1.03803			1.02995
5.53038	1.03301			1.0291
5.6323	1.03113			1.0268
5.73108	1.02986			1.0254
5.82893	1.02987			1.02549
5.9298	1.02832			1.02418
6.02978	1.02849			1.02479
6.1291	1.02787			1.02364
6.23013	1.02773			1.02354
6.32958	1.0266			1.02245
6.43063	1.02706			1.02293
6.53023	1.02575			1.02241
6.63003	1.02658			1.02287
6.73108	1.02557			1.02189
6.83123	1.02585			1.0218
6.92957	1.02604			1.02197
7.02998	1.02557			1.0215
7.13038	1.02633			1.02197
7.2297	1.0267			1.02227
7.3306	1.02622			1.0212
7.43123	1.02933			1.02394
7.53188	1.02959	0.028599	50	1.02386	0.022994	43
7.63132	1.02891			1.02301
7.73147	1.02949			1.02343
7.83222	1.02906			1.02258
7.93185	1.0287			1.02199
8.03103	1.02792			1.02154
8.13058	1.02788			1.0211
8.23287	1.02835			1.02188
8.3295	1.02667			1.02063
8.42908	1.02515			1.0192
8.53048	1.02528			1.01954
8.6306	1.02773			1.02125
8.73108	1.02573			1.01934
8.8316	1.02852			1.02096
8.9293	1.02554			1.01899
9.03077	1.02568			1.01911
9.13042	1.02727			1.02068
9.23292	1.02621			1.01999
9.32887	1.02633			1.01999
9.43005	1.02653			1.02086
9.52998	1.02435			1.01918
9.62915	1.02755			1.01901
9.73067	1.02844			1.0201
9.83068	1.02955			1.02052
9.9307	1.02852			1.01975
10.0305	1.01969	0.03062	68	1.01225	0.022501	65
10.1302	1.02367			1.01615
10.2318	1.02516			1.01698
10.3293	1.02378			1.01604
10.4294	1.02387			1.01565
10.5303	1.02301			1.01523
10.6293	1.02213			1.01433
10.7304	1.02234			1.01487
10.831	1.02385			1.01609
10.9301	1.02162			1.01442
11.0302	1.02203			1.0145
11.1302	1.02229			1.01497
11.2294	1.0239			1.01605
11.3305	1.02372			1.01577
11.4309	1.02277			1.01646
11.5305	1.02266			1.01581
11.6303	1.02292			1.01625
11.7291	1.0235			1.0167
11.829	1.02217			1.01506
11.9293	1.02271			1.01627
12.0307	1.02179			1.01523
12.1308	1.02132			1.01497
12.2314	1.02213			1.01564
12.3296	1.02226			1.01558
12.4308	1.02211			1.01557
12.5305	1.02246	0.026917	68	1.01626	0.024398	65
12.6306	1.02214			1.01561
12.7303	1.02234			1.01573
12.8328	1.02229			1.01594
12.9298	1.02126			1.01547
13.0308	1.02147			1.01548
13.1292	1.02138			1.01534
13.2297	1.02105			1.01504
13.3303	1.02135			1.01542
13.4326	1.02087			1.01505
13.53	1.02129			1.01554
13.6301	1.0217			1.01581
13.7304	1.02163			1.01584
13.831	1.01963			1.01415
13.9308	1.02076			1.01495
14.0291	1.01988			1.0143
14.1302	1.02018			1.0145
14.2294	1.01785			1.01237
14.3307	1.01898			1.01341
14.4302	1.01772			1.01256
14.5296	1.02012			1.0146
14.6306	1.01977			1.01456
14.731	1.01874			1.01345
14.8312	1.01803			1.01301
14.9301	1.01948			1.01398
15.0298	1.0185	0.026354	68	1.01328	0.02263	65
15.1297	1.01896			1.01375
15.2307	1.01901			1.01381
15.3331	1.02027			1.0154
15.4311	1.02025			1.01448
15.5305	1.02045			1.01457
15.6328	1.01985			1.01383
15.7322	1.02003			1.01422
15.832	1.01975			1.01402
15.9308	1.01954			1.01401
16.0292	1.01929			1.01394
16.1309	1.01949			1.01422
16.2305	1.01876			1.01361
16.33	1.01911			1.0138
16.4309	1.01915			1.01432
16.5315	1.01943			1.0148
16.6298	1.01917			1.01389
16.7298	1.01987			1.01496
16.8305	1.01833			1.01399
16.933	1.01982			1.01516
17.0308	1.0192			1.01452
17.1297	1.01868			1.01398
17.2313	1.0192			1.01477
17.3318	1.01867			1.01434
17.4295	1.01866			1.01457
17.5305	1.01861	0.027683	68	1.0148	0.020688	65
17.6304	1.01875			1.01482
17.7326	1.01797			1.01463
17.8298	1.01867			1.01488
17.9306	1.01803			1.01435
18.0307	1.01772			1.0136
18.1305	1.01725			1.01361
18.2306	1.01673			1.01345
18.3316	1.01738			1.01371
18.4319	1.01708			1.01366
18.5313	1.01779			1.01417
18.6295	1.01367			1.01444
18.7292	1.01059			1.01248
18.8296	1.01176			1.01346
18.9311	1.01223			1.01391
19.0314	1.011			1.01257
19.1313	1.01246			1.01458
19.2305	1.01244			1.01447
19.3303	1.01149			1.01402
19.4307	1.01198			1.0139
19.5294	1.01237			1.01462
19.6304	1.01189			1.01404
19.7302	1.01165			1.01382
19.8292	1.01055			1.01313
19.9296	1.00962			1.01245
20.0305	1.00874	0.011338	68	1.01204	0.018914	65
20.1297	1.0111			1.01341
20.2306	1.01139			1.01343
20.3305	1.01181			1.01407
20.4307	1.01077			1.01322
20.531	1.01017			1.01293
20.6293	1.01058			1.01358
20.7312	1.01163			1.0141
20.829	1.01142			1.0139
20.9295	1.01049			1.013
21.03	1.01037			1.01303
21.1309	1.01068			1.01379
21.2299	1.00936			1.01267
21.3308	1.00926			1.01247
21.4306	1.00859			1.01178
21.5292	1.00892			1.01182
21.6295	1.00864			1.01154
21.7293	1.00929			1.01255
21.83	1.00867			1.01183
21.9288	1.00881			1.01225
22.0304	1.00756			1.01136
22.1321	1.00637			1.00859
22.231	1.0081			1.00972
22.3298	1.02173			1.0254
22.43	1.02253			1.02607
22.53	1.01968	0.043637	68	1.02428	0.042047	65
22.6293	1.02756			1.03418
22.7307	1.01519			1.01642
22.8304	1.02085			1.0215
22.9301	1.01645			1.02175
23.0299	1.01003			1.01155
23.1307	1.00972			1.01134
23.2309	1.0091			1.00976
23.3307	1.00867			1.00951
23.431	1.00828			1.00744
23.5313	1.00606			1.00613
23.6313	1.00423			1.00556
23.7321	1.00395			1.00487
23.8315	1.00338			1.00457
23.9301	1.0053			1.00593
24.0306	1.0046			1.0054
24.1324	1.00624			1.00714
24.232	1.00473			1.00547
24.3316	1.0053			1.00604
24.4294	1.00533			1.00598
24.5308	1.00611			1.00665
24.6298	1.00568			1.0064
24.7307	1.0051			1.00586
24.8303	1.00578			1.00643
24.9294	1.00486			1.00568
25.0307	1.00428	0.007684	68	1.00506	0.008762	65
25.1306	1.00272			1.00377
25.2308	1.00257			1.00335
25.3301	1.00147			1.00267
25.4306	1.00248			1.00271
25.5304	1.00288			1.00344
25.6298	1.0029			1.00346
25.7293	1.00311			1.00376
25.8294	1.00231			1.00299
25.9304	1.00232			1.00303
26.0325	1.0014			1.0018
26.1318	1.0022			1.00263
26.2295	1.00303			1.00346
26.3297	1.00274			1.0036
26.4306	1.00259			1.00356
26.5302	1.00223			1.00301
26.6312	1.0024			1.00305
26.732	1.00196			1.00259
26.8321	1.00206			1.00297
26.9328	1.00203			1.00258
27.0296	1.00214			1.00252
27.131	1.00369			1.00376
27.2313	1.00355			1.0039
27.3301	1.00376			1.00402
27.4319	1.00295			1.00313
27.529	1.0024	0.005788	68	1.0024	0.005499	65
27.6298	1.00227			1.00237
27.7294	1.00178			1.00213
27.834	1.0021			1.00239
27.9353	1.00082			1.00151
28.0312	1.00194			1.0022
28.1337	1.00079			1.00121
28.2332	1.00027			1.00046
28.3357	1.00052			1.00078
28.4363	1.00057			1.0006
28.5391	1.00047			1.00056
28.6319	0.999249			0.999437
28.7421	1.0003			1.0002
28.83	0.99937			0.999324
28.9306	0.999225			0.999493
29.0307	1.00001			0.999982
29.1299	0.999447			0.999382
29.2307	0.998234			0.998292
29.3305	0.998699			0.998407
29.4312	0.998564			0.998861
29.5302	0.998406			0.998427
29.6295	0.997164			0.99715
29.73	0.9972			0.997052
29.8302	0.996409			0.995829
29.9312	0.997533			0.997391
30.0295	0.996885	0.004619	68	0.996927	0.004111	65
30.1307	0.996951			0.996352
30.2301	0.996725			0.996613
30.3295	0.996626			0.996029
30.4311	0.99625			0.996197
30.5316	0.996996			0.996778
30.6311	0.996424			0.996358
30.7293	0.997119			0.996603
30.8306	0.99731			0.995931
30.9299	0.99773			0.995444
31.0299	1.00037			0.995682
31.1293	1.00224			0.994985
31.2291	1.00515			0.995506
31.3311	1.01032			0.996803
31.4321	1.01628			0.998716
31.5312	1.02268			1.00147
31.6313	1.02898			1.00371
31.7307	1.03547			1.00697
31.829	1.0426			1.0108
31.9298	1.04919			1.0151
32.0296	1.05425			1.01823
32.1309	1.05859			1.02151
32.2313	1.06389			1.02521
32.3309	1.06726			1.0278
32.4319	1.07237			1.03204
32.5316	1.07586	0.047397	68	1.03487	0.042133	65
32.6297	1.07885			1.03808
32.7306	1.0812			1.04058
32.8313	1.08368			1.04306
32.9317	1.08634			1.04556
33.0306	1.08889			1.04881
33.1302	1.09139			1.05155
33.2291	1.09293			1.05302
33.3306	1.09464			1.05562
33.4301	1.0958			1.0575
33.5295	1.09709			1.05928
33.6307	1.09841			1.06026
33.7307	1.10146			1.06433
33.832	1.1009			1.06494
33.9308	1.10174			1.06585
34.0309	1.1035			1.06792
34.1319	1.10417			1.06901
34.2306	1.10468			1.07086
34.3295	1.10597			1.0724
34.4311	1.10772			1.07387
34.5296	1.10724			1.0748
34.6309	1.10696			1.07446
34.7292	1.10827			1.07701
34.8302	1.10834			1.07677
34.93	1.11073			1.08037
35.0295	1.11074	0.042332	68	1.08086	0.03861	65
35.1296	1.11075			1.0816
35.2295	1.11105			1.0819
35.3306	1.11232			1.08355
35.4306	1.11125			1.08256
35.5297	1.11421			1.08609
35.6294	1.1144			1.08672
35.7306	1.1139			1.08678
35.8307	1.11294			1.08628
35.9308	1.11425			1.08739
36.0299	1.11298			1.08562
36.1294	1.11483			1.08862
36.2309	1.11427			1.08858
36.3295	1.11442			1.08897
36.431	1.11512			1.08952
36.5309	1.11436			1.0892
36.6294	1.11499			1.09017
36.7291	1.11472			1.08975
36.8291	1.11593			1.09098
36.9305	1.11549			1.09081
37.0311	1.11669			1.09183
37.1317	1.11634			1.0913
37.2299	1.11699			1.09218
37.3294	1.1178			1.09319
37.4293	1.11764			1.09297
37.5296	1.11825	0.046811	68	1.09342	0.037275	65
37.6294	1.11909			1.09392
37.7305	1.11816			1.09322
37.8304	1.11832			1.09323
37.9292	1.11831			1.09304
38.0296	1.11883			1.09319
38.1309	1.11928			1.09378
38.2312	1.11896			1.0935
38.3289	1.12047			1.09468
38.4294	1.12006			1.09408
38.5294	1.12057			1.09419
38.6293	1.12022			1.09366
38.7307	1.12081			1.09437
38.8296	1.12116			1.09428
38.9295	1.12105			1.09391
39.0308	1.12092			1.09399
39.1295	1.12265			1.09542
39.2296	1.12365			1.09587
39.3309	1.12374			1.09579
39.4318	1.12397			1.09569
39.5321	1.12463			1.09599
39.6318	1.12591			1.0968
39.7318	1.12527			1.09627
39.8304	1.12597			1.09614
39.929	1.12663			1.09657
40.0306	1.12646	0.053064	68	1.0962	0.041177	65
40.1293	1.12681			1.09597
40.229	1.12699			1.09571
40.3293	1.12766			1.09601
40.431	1.12809			1.09619
40.5294	1.12852			1.09648
40.6311	1.12883			1.09636
40.7318	1.12992			1.09669
40.8317	1.12943			1.09624
40.9312	1.13062			1.09747
41.0296	1.13074			1.09697
41.1309	1.13332			1.09881
41.2295	1.13321			1.09884
41.3306	1.13356			1.09878
41.43	1.13396			1.0988
41.5301	1.13474			1.09958
41.6303	1.13514			1.09944
41.7296	1.13514			1.09905
41.8302	1.13429			1.09859
41.9301	1.13327			1.09676
42.0292	1.13414			1.0977
42.131	1.13491			1.09826
42.23	1.13602			1.09873
42.3291	1.13712			1.10001
42.4303	1.13759			1.10004
42.5296	1.13778	0.05992	68	1.10041	0.04854	65
42.629	1.13545			1.09852
42.7294	1.13807			1.09998
42.8306	1.13908			1.10086
42.9299	1.13888			1.10091
43.0298	1.13918			1.10078
43.1293	1.13917			1.10049
43.2312	1.14069			1.10224
43.3319	1.14179			1.10247
43.4304	1.14204			1.1034
43.5303	1.14194			1.10346
43.6305	1.14225			1.10339
43.7295	1.14307			1.10461
43.8312	1.14241			1.10368
43.9307	1.14246			1.10412
44.0294	1.14202			1.10374
44.1307	1.14195			1.10379
44.2299	1.14303			1.10468
44.3306	1.14314			1.10475
44.4309	1.14341			1.10486
44.5314	1.14324			1.10454
44.6298	1.1441			1.10588
44.7305	1.14437			1.10609
44.8306	1.1442			1.10579
44.9303	1.14601			1.10809
45.0296	1.14579	0.060363	68	1.10769	0.053132	65
45.1302	1.14644			1.10833
45.2308	1.14466			1.10602
45.3305	1.14786			1.11083
45.4304	1.14916			1.11122
45.5303	1.14805			1.11054
45.6307	1.14724			1.10876
45.7306	1.14609			1.10746
45.8301	1.14833			1.11027
45.9304	1.14824			1.11067
46.0294	1.15083			1.11345
46.1306	1.15126			1.114
46.23	1.1527			1.11487
46.3308	1.15208			1.1144
46.4294	1.1511			1.11345
46.5294	1.15272			1.11473
46.6298	1.15319			1.11561
46.7295	1.15456			1.11739
46.8296	1.1566			1.1193
46.9295	1.15659			1.11966
47.0294	1.15564			1.11963
47.1295	1.15656			1.1201
47.2309	1.15408			1.11799
47.3295	1.15599			1.12019
47.4297	1.15638			1.12051
47.5301	1.15774	0.064263	68	1.1218	0.0598	65
47.6292	1.15791			1.12266
47.7311	1.15556			1.12035
47.8314	1.15824			1.12278
47.9308	1.15756			1.12216
48.0299	1.1482			1.1156
48.1296	1.14817			1.11538
48.2304	1.14867			1.11579
48.3293	1.14823			1.11575
48.4311	1.1482			1.11614
48.5308	1.14818			1.11607
48.6293	1.14813			1.11584
48.7294	1.14884			1.11639
48.8295	0.927123			0.861366
48.931	0.927223			0.861257
49.0311	0.928883			0.863079
49.131	0.929872			0.864847
49.2311	0.928421			0.86374
49.3319	0.929515			0.864521
49.4319	0.929306			0.864544
49.5307	0.928306			0.864156

## Sheet: 4F
Average Traces
Time [m]	WT -Pka			KO -Pka
	Mean	SD	N	Mean	SD	N
0.0276	1.2004	0.07363	85	1.1714	0.068002	83
0.129617	1.19634			1.16671
0.229183	1.19318			1.16326
0.329133	1.19119			1.16156
0.430467	1.18972			1.1603
0.53025	1.18521			1.15601
0.6306	1.17949			1.15002
0.730267	1.17683			1.14806
0.8294	1.1762			1.14762
0.93065	1.1733			1.14446
1.03033	1.17158			1.14313
1.1293	1.17002			1.14232
1.23082	1.17033			1.1428
1.33018	1.16842			1.14107
1.42873	1.1668			1.14063
1.5305	1.16677			1.14009
1.63057	1.16703			1.13965
1.73048	1.16566			1.13983
1.82902	1.16367			1.13766
1.9292	1.16208			1.1365
2.02892	1.15948			1.13396
2.12905	1.15658			1.13158
2.2292	1.15662			1.13203
2.33005	1.15459			1.1305
2.42928	1.15448			1.13032
2.53007	1.15268	0.059486	85	1.1289	0.054954	83
2.62932	1.14905			1.12568
2.73033	1.14513			1.12175
2.82933	1.14178			1.11897
2.93033	1.13992			1.11747
3.0292	1.13671			1.11481
3.12953	1.13245			1.11062
3.23018	1.13182			1.1105
3.32845	1.12912			1.10817
3.43083	1.1264			1.10584
3.53022	1.12267			1.10245
3.62938	1.1208			1.1009
3.72927	1.11741			1.09818
3.82883	1.11558			1.09651
3.92917	1.11195			1.09357
4.03038	1.1105			1.09263
4.13067	1.10816			1.09086
4.2289	1.10705			1.08997
4.32922	1.10534			1.08889
4.42897	1.1028			1.08646
4.52882	1.10413			1.08804
4.63162	1.10199			1.08634
4.73018	1.09996			1.08456
4.82923	1.09968			1.08444
4.93055	1.09998			1.08504
5.03007	1.0977	0.055751	85	1.08329	0.051573	83
5.13038	1.09607			1.08208
5.23023	1.09433			1.0806
5.33033	1.09272			1.07892
5.43065	1.09242			1.07909
5.53053	1.09002			1.07726
5.63048	1.08969			1.07696
5.73052	1.08725			1.07492
5.83032	1.08664			1.07456
5.92963	1.08672			1.07477
6.03083	1.08577			1.07404
6.1307	1.08404			1.07246
6.2305	1.08164			1.07048
6.33042	1.08091			1.07008
6.42912	1.08049			1.06956
6.52907	1.07867			1.06811
6.62907	1.07794			1.06739
6.72857	1.07808			1.06791
6.82923	1.07464			1.06438
6.93055	1.0756			1.06561
7.0309	1.07596			1.06612
7.13075	1.07399			1.06397
7.23038	1.07313			1.06335
7.33002	1.07245			1.06294
7.4291	1.07196			1.06262
7.52898	1.07158	0.048125	85	1.06204	0.041839	83
7.62902	1.07326			1.06388
7.72955	1.0727			1.06331
7.83023	1.07101			1.06198
7.93055	1.0715			1.06251
8.03042	1.07074			1.06182
8.13062	1.07032			1.06171
8.23043	1.06906			1.06044
8.33037	1.0693			1.06081
8.43025	1.06787			1.05959
8.52927	1.0668			1.05832
8.6304	1.06514			1.05681
8.73045	1.0644			1.05625
8.83002	1.06298			1.05487
8.93047	1.06048			1.05276
9.03015	1.06262			1.05477
9.12918	1.05997			1.05267
9.23055	1.06101			1.05401
9.33017	1.0612			1.05372
9.42898	1.05928			1.05189
9.52928	1.05938			1.05215
9.62953	1.05945			1.05209
9.72935	1.05904			1.05166
9.82915	1.05924			1.05185
9.93038	1.06023			1.05286
10.0297	1.0591	0.032613	85	1.05212	0.026752	83
10.1291	1.05805			1.05117
10.229	1.05836			1.0514
10.3286	1.05656			1.04984
10.4291	1.05665			1.05001
10.5287	1.05569			1.04885
10.6292	1.05581			1.0495
10.7302	1.05527			1.04872
10.8286	1.05395			1.04721
10.9288	1.05447			1.04791
11.0289	1.05354			1.04703
11.1291	1.05059			1.04434
11.2294	1.05035			1.04421
11.3305	1.0509			1.04503
11.4293	1.05048			1.04436
11.5309	1.04936			1.04374
11.6303	1.05141			1.04524
11.7293	1.05035			1.04435
11.829	1.04825			1.04232
11.9286	1.05117			1.04525
12.029	1.04936			1.04386
12.1293	1.05113			1.045
12.2293	1.04903			1.04331
12.3306	1.04756			1.04198
12.4309	1.04882			1.0429
12.5304	1.04827			1.04263	0.027164	83
12.63	1.04867			1.04289
12.7293	1.04873			1.04297
12.8302	1.04865			1.04296
12.9291	1.04717			1.04158
13.0289	1.04795			1.04217
13.1294	1.0471			1.04132
13.2303	1.04832			1.04246
13.3303	1.0452			1.03958
13.4287	1.04511			1.03976
13.5292	1.0437			1.03825
13.6305	1.04329			1.0378
13.7305	1.04553			1.03998
13.8304	1.04344			1.03801
13.9309	1.04456			1.03943
14.0308	1.04408			1.0389
14.1302	1.04418			1.03913
14.2291	1.04387			1.03903
14.3288	1.04503			1.03997
14.4309	1.04403			1.03906
14.5306	1.04305			1.03824
14.6306	1.03876			1.03407
14.7305	1.0432			1.03868
14.8303	1.04315			1.03825
14.9305	1.04211			1.03723
15.0301	1.04255			1.03767	0.021179	83
15.1292	1.04118			1.03631
15.2309	1.04231			1.0374
15.3302	1.03989			1.03524
15.4289	1.03944			1.03469
15.5286	1.03881			1.03409
15.6323	1.0375			1.03287
15.7307	1.03771			1.03315
15.83	1.03613			1.0318
15.9302	1.03697			1.03262
16.0281	1.03517			1.03081
16.1302	1.03445			1.03018
16.2318	1.03111			1.02696
16.3303	1.03205			1.02795
16.4301	1.03201			1.02791
16.5292	1.03093			1.02694
16.6292	1.0305			1.02649
16.7298	1.02892			1.0253
16.831	1.03018			1.02661
16.9304	1.02811			1.02486
17.0288	1.02868			1.02545
17.1292	1.03004			1.02667
17.2305	1.02953			1.02623
17.3303	1.02832			1.02516
17.4288	1.02759			1.0243
17.5291	1.02704			1.02376	0.014988	83
17.6292	1.02734			1.02433
17.7299	1.02633			1.02316
17.8308	1.02671			1.02353
17.9301	1.02521			1.02239
18.0287	1.02327			1.02052
18.1296	1.02253			1.01997
18.2305	1.02384			1.02105
18.3302	1.02293			1.02036
18.4291	1.02224			1.01954
18.5289	1.01976			1.01715
18.6289	1.02159			1.01913
18.7306	1.01953			1.01731
18.8306	1.02001			1.01737
18.9302	1.01737			1.015
19.0292	1.01889			1.01663
19.1311	1.01798			1.01559
19.231	1.01703			1.01467
19.3307	1.01745			1.01483
19.4303	1.01741			1.01507
19.5305	1.01684			1.01441
19.6306	1.01668			1.01438
19.7306	1.01576			1.01361
19.8307	1.01697			1.01519
19.9303	1.01612			1.01405
20.0292	1.01855			1.01682	0.010562	98
20.1293	1.01785			1.01593
20.2306	1.01821			1.01657
20.3302	1.0181			1.01631
20.4292	1.01702			1.0151
20.5295	1.01746			1.0157
20.6294	1.01681			1.01501
20.7306	1.01759			1.01574
20.8304	1.0159			1.01426
20.9287	1.01644			1.01473
21.0291	1.01398			1.01249
21.1299	1.01578			1.01425
21.2308	1.01405			1.01233
21.3297	1.01345			1.01171
21.429	1.01155			1.01025
21.5289	1.01137			1.00975
21.6304	1.01123			1.00971
21.7293	1.01098			1.00948
21.8306	1.01257			1.01075
21.9304	1.01344			1.01205
22.0289	1.01207			1.01049
22.1304	1.01244			1.01109
22.2295	1.01005			1.00883
22.3303	1.01126			1.00993
22.4304	1.01172			1.01057
22.5293	1.01216			1.01073	0.008855	98
22.6295	1.01093			1.00955
22.7311	1.01113			1.00978
22.8304	1.01151			1.0102
22.9302	1.01093			1.00975
23.0289	1.00872			1.00789
23.1306	1.011			1.00978
23.2303	1.01079			1.00942
23.3307	1.0087			1.00774
23.4308	1.00985			1.00864
23.5303	1.01047			1.00932
23.6311	1.01003			1.00869
23.7289	1.00986			1.00896
23.8305	1.00884			1.00781
23.9304	1.00976			1.00865
24.0292	1.00758			1.00661
24.1293	1.00747			1.00648
24.2306	1.00671			1.00584
24.3299	1.00722			1.00605
24.429	1.00744			1.00637
24.5303	1.00589			1.00495
24.6309	1.00667			1.00579
24.7302	1.00597			1.00511
24.8305	1.00544			1.00473
24.931	1.00633			1.00535
25.0297	1.00706	0.033623	85	1.00622	0.004428	98
25.1309	1.00446			1.00384
25.2303	1.0055			1.00488
25.3308	1.00478			1.00412
25.4305	1.00504			1.00438
25.5314	1.00368			1.00297
25.63	1.00454			1.00381
25.7315	1.00595			1.00503
25.8287	1.00433			1.00337
25.929	1.00455			1.00364
26.0292	1.00578			1.00466
26.1332	1.00514			1.0042
26.2319	1.00402			1.00295
26.3306	1.0047			1.00381
26.4302	1.00242			1.00152
26.5312	1.00132			1.00048
26.6296	1.002			1.00148
26.7307	1.00055			0.999755
26.8298	1.00139			1.00067
26.9323	1.00131			1.00039
27.0318	1.00368			1.00325
27.1319	1.00269			1.0019
27.2295	1.00193			1.00143
27.3294	1.00204			1.00131
27.4306	1.00106			1.00061
27.5313	1.00138	0.025944	85	1.00078	0.00536	98
27.6299	1.0008			1.00017
27.7305	1.00144			1.00097
27.8293	1.00074			1.00021
27.9302	1.00098			1.00088
28.031	1.00112			1.00118
28.1298	1.00225			1.00188
28.2305	1.00059			1.00065
28.3305	1.00175			1.00152
28.4307	1.00045			1.00019
28.5305	1.0023			1.00174
28.6305	1.00148			1.00116
28.7297	1.00013			1.00006
28.8289	0.999545			0.999365
28.9306	1.00134			1.00112
29.0306	1.00038			1.00036
29.1294	0.999079			0.999202
29.2306	0.998084			0.998294
29.3305	1.00057			1.00111
29.4309	0.998147			0.998408
29.5289	0.999326			0.999732
29.6306	1.00006			1.00018
29.7286	0.998472			0.998545
29.8288	0.997511			0.997874
29.9325	0.997397			0.997444
30.0286	0.996704	0.018695	85	0.997208	0.002829	98
30.1328	0.996934			0.997212
30.2294	0.995981			0.996223
30.3305	0.998172			0.998524
30.4306	0.997598			0.997796
30.5308	0.995969			0.996057
30.63	0.995785			0.996097
30.7299	0.997462			0.997779
30.8302	0.996033			0.99706
30.9305	1.00044			1.00117
31.0308	1.00204			1.00311
31.1298	1.00295			1.00458
31.2303	1.00858			1.00998
31.3308	1.01428			1.01577
31.4308	1.02125			1.02251
31.5288	1.029			1.0296
31.6307	1.03915			1.0389
31.7305	1.05194			1.05048
31.8306	1.064			1.06129
31.9305	1.07752			1.073
32.0305	1.08996			1.08387
32.1295	1.104			1.09586
32.2301	1.11987			1.10968
32.3303	1.13211			1.11992
32.4303	1.14558			1.13136
32.5299	1.15735	0.013243	99	1.14174	0.084699	98
32.6303	1.17038			1.15289
32.7298	1.17983			1.16112
32.8306	1.19076			1.1704
32.9303	1.20006			1.17867
33.0306	1.20794			1.18477
33.13	1.21865			1.19475
33.2299	1.2257			1.20109
33.3294	1.23029			1.20484
33.4288	1.23717			1.21092
33.5297	1.24084			1.21409
33.6307	1.24792			1.21997
33.7296	1.25209			1.22309
33.8295	1.25668			1.22701
33.9306	1.26175			1.23104
34.0307	1.26327			1.23206
34.1294	1.26645			1.23406
34.2297	1.27112			1.238
34.3304	1.27327			1.23907
34.4306	1.27731			1.24234
34.5311	1.27713			1.24067
34.6292	1.27915			1.24151
34.7305	1.27622			1.2375
34.8303	1.28081			1.24118
34.9303	1.28292			1.24208
35.03	1.28473	0.009872	99	1.2428	0.087988	98
35.1294	1.2821			1.23993
35.2304	1.28473			1.24149
35.3304	1.28339			1.23973
35.429	1.28525			1.24091
35.5302	1.28444			1.23992
35.6299	1.28496			1.2399
35.7293	1.28251			1.23742
35.8309	1.28268			1.23757
35.9296	1.28151			1.23666
36.0307	1.28084			1.23596
36.1293	1.28318			1.23784
36.2308	1.28326			1.23827
36.3301	1.28242			1.23767
36.4301	1.28232			1.23745
36.5293	1.27957			1.23547
36.6306	1.28086			1.23661
36.7296	1.28037			1.23651
36.8289	1.27842			1.23489
36.9298	1.27955			1.23639
37.029	1.27965			1.23615
37.1312	1.28075			1.2377
37.2292	1.27881			1.23629
37.3308	1.27878			1.2363
37.4297	1.28068			1.23809
37.5291	1.27815	0.005624	99	1.23573	0.072946	98
37.6311	1.27981			1.23793
37.7289	1.28046			1.23867
37.8306	1.28202			1.24028
37.9308	1.28278			1.24089
38.0301	1.28366			1.24199
38.1294	1.28432			1.24323
38.2309	1.28622			1.2451
38.3295	1.28434			1.24416
38.4308	1.28448			1.24537
38.5297	1.28595			1.24726
38.6307	1.28527			1.24688
38.7298	1.28611			1.24773
38.8291	1.28669			1.24859
38.9308	1.28893			1.25107
39.0307	1.28861			1.25091
39.1287	1.29216			1.25469
39.2293	1.29108			1.25424
39.3308	1.29539			1.25857
39.4305	1.29875			1.2624
39.5311	1.29915			1.2632
39.6306	1.30026			1.26514
39.7304	1.3035			1.26859
39.8304	1.30431			1.26933
39.93	1.30626			1.27203
40.0312	1.31016	0.006407	99	1.27577	0.100241	98
40.1296	1.31411			1.27946
40.2306	1.31464			1.28033
40.3306	1.31889			1.28406
40.4299	1.31806			1.28315
40.5297	1.31951			1.28435
40.6305	1.32296			1.28799
40.7306	1.32318			1.28821
40.8309	1.32324			1.2885
40.9311	1.32309			1.28848
41.0307	1.32504			1.29019
41.1311	1.32502			1.2904
41.2296	1.32655			1.2919
41.3305	1.32744			1.29291
41.4311	1.3275			1.29293
41.5292	1.32872			1.29407
41.6309	1.33161			1.29681
41.7296	1.33203			1.29695
41.8306	1.33379			1.29852
41.9314	1.33429			1.29903
42.0299	1.33479			1.29992
42.1302	1.33666			1.30135
42.2313	1.33521			1.30026
42.329	1.3366			1.30156
42.4309	1.33949			1.30421
42.5966	1.34049	0.003959	99	1.30472	0.121373	98
42.6719	1.34113			1.30539
42.7443	1.33971			1.30411
42.835	1.34265			1.30651
42.9344	1.34249			1.30675
43.0327	1.34109			1.30534
43.137	1.34429			1.30769
43.2308	1.34628			1.3097
43.3287	1.34406			1.30716
43.4323	1.34326			1.3065
43.5323	1.34433			1.30715
43.6329	1.34553			1.30846
43.7319	1.34736			1.30983
43.8307	1.34613			1.30821
43.9304	1.34693			1.30898
44.0333	1.34708			1.30898
44.1334	1.34537			1.30739
44.2362	1.34734			1.30911
44.333	1.34897			1.31082
44.4312	1.352			1.31356
44.5322	1.35006			1.3116
44.6328	1.34952			1.31074
44.7293	1.35036			1.31143
44.831	1.34813			1.30896
44.9292	1.34876			1.30929
45.0307	1.34901	0.081242	99	1.30949	0.132754	98
45.1299	1.34725			1.30761
45.2308	1.34689			1.3074
45.3293	1.34921			1.30955
45.429	1.34986			1.3104
45.5305	1.3507			1.31103
45.63	1.35055			1.31088
45.7308	1.35087			1.31102
45.8296	1.3516			1.31167
45.9311	1.35285			1.3122
46.0296	1.35363			1.31239
46.1312	1.35165			1.30934
46.23	1.35324			1.30992
46.3303	1.35135			1.30769
46.4294	1.3542			1.30978
46.5293	1.35455			1.31008
46.6297	1.35024			1.3056
46.731	1.35403			1.30933
46.8297	1.35458			1.30938
46.9308	1.35334			1.30832
47.0291	1.35351			1.30808
47.1314	1.35335			1.30811
47.2296	1.34966			1.30427
47.3303	1.35234			1.30697
47.4309	1.35089			1.30553
47.5294	1.35032	0.105935	99	1.3046	0.127362	98
47.6286	1.35058			1.30487
47.7312	1.34983			1.30417
47.8308	1.34869			1.30269
47.9288	1.34689			1.30082
48.0311	1.34676			1.30069
48.1314	1.34573			1.3
48.2287	1.34553			1.2996
48.3296	1.34478			1.29905
48.4312	1.34495			1.2992
48.5289	1.34414			1.29836
48.6309	1.34457			1.29853
48.7296	1.34292			1.29739
48.8302	1.34212			1.29647
48.9298	1.34185			1.296
49.0309	1.34161			1.29584
49.1296	1.33961			1.29418
49.2311	1.34393			1.29759
49.3297	1.34373			1.29733
49.4309	1.34546			1.29856
49.5293	1.3465			1.2994
49.6287	1.34627			1.29927
49.7315	1.34624			1.29953
49.8312	1.34419			1.29761
49.9297	1.34159			1.29484
50.033	1.34142	0.086777	99	1.29494	0.117811	98
50.131	1.34063			1.29416
50.2297	1.33904			1.29291
50.3314	1.34122			1.29478
50.4295	1.34095			1.29448
50.5318	1.33852			1.29227
50.6312	1.33789			1.2918
50.7299	1.33972			1.29315
50.8312	1.3399			1.2935
50.9293	1.33756			1.29151
51.0311	1.33663			1.29057
51.1308	1.36984			1.32267
51.231	1.36847			1.32154
51.3309	1.36956			1.32201
51.4296	1.36538			1.31838
51.531	1.39989			1.3518
51.631	1.39667			1.34869
51.7302	1.39486			1.34715
51.8314	1.39595			1.34817
51.9297	1.39507			1.34763
52.0307	1.39506			1.34747
52.1297	1.39413			1.34688
52.2312	1.39297			1.34619
52.3311	1.39017			1.34364
52.4294	1.39101			1.34492
52.531	1.39127	0.101737	99	1.34554	0.082475	65
52.6296	1.38765			1.34276
52.731	1.38485			1.33997
52.8314	1.38567			1.34051
52.9311	1.3852			1.3401
53.0294	1.3869			1.34172
53.1312	1.38485			1.34049
53.2311	1.38813			1.34361
53.3295	1.38415			1.34054
53.4308	1.38543			1.34199
53.5296	1.3855			1.34254
53.6315	1.38256			1.34008
53.73	1.38173			1.33942
53.8311	1.38128			1.33934
53.9311	1.38027			1.33861
54.0291	1.38141			1.33952
54.1297	1.37835			1.33699
54.2311	1.37891			1.33772
54.331	1.37966			1.33859
54.4311	1.37994			1.33927
54.5299	1.37882			1.33837
54.6312	1.37905			1.33896
54.7298	1.37873			1.33887
54.831	1.37845			1.33913
54.9293	1.37743			1.3383
55.0309	1.37839	0.125183	99	1.33962	0.085773	65

## Sheet: 4G
Average Traces
Time [m]	WT +Pka			KO +Pka
	Mean	SD	N	Mean	SD	N
0.006217	1.13026	0.056677	72	1.08072	0.051564	68
0.126917	1.1305			1.08158
0.226867	1.12755			1.0792
0.326383	1.12852			1.08035
0.426583	1.12627			1.07899
0.526667	1.12617			1.08025
0.626933	1.12185			1.07689
0.726617	1.11761			1.07357
0.8275	1.11984			1.07615
0.926933	1.12232			1.07791
1.02672	1.12006			1.07573
1.12847	1.12259			1.07799
1.22837	1.12142			1.07655
1.32828	1.12036			1.07606
1.42823	1.11842			1.07416
1.52813	1.11737			1.07117
1.62828	1.11912			1.0731
1.7285	1.11626			1.07049
1.82832	1.11525			1.0698
1.92797	1.11395			1.07007
2.02697	1.11184			1.0675
2.12693	1.10983			1.06523
2.227	1.11			1.06693
2.32697	1.11128			1.0687
2.42695	1.10797			1.06546
2.52838	1.10846	0.042729	72	1.06614	0.048946	68
2.62825	1.10453			1.06305
2.72828	1.10366			1.0621
2.8275	1.10534			1.06366
2.92702	1.10344			1.06231
3.02695	1.10183			1.06109
3.12725	1.09919			1.05879
3.22685	1.10064			1.06056
3.3267	1.09723			1.0576
3.42807	1.09727			1.05755
3.52665	1.0969			1.05732
3.63605	1.09526			1.05621
3.73617	1.09456			1.05561
3.83475	1.09162			1.05289
3.93373	1.08778			1.05574
4.0291	1.08677			1.04775
4.12778	1.08545			1.04697
4.22645	1.08352			1.04485
4.3282	1.08241			1.04413
4.42667	1.08144			1.0433
4.5265	1.08274			1.04448
4.62797	1.07814			1.03991
4.72695	1.08072			1.04182
4.82808	1.08005			1.04193
4.92695	1.0767			1.03861
5.02757	1.07617	0.033329	72	1.03818	0.039969	68
5.12665	1.07237			1.03475
5.2262	1.07455			1.03682
5.3286	1.06971			1.03211
5.43343	1.07237			1.03493
5.54032	1.07135			1.03408
5.63038	1.06909			1.03206
5.72783	1.06703			1.03024
5.8275	1.06618			1.02919
5.92718	1.0676			1.03059
6.03612	1.067			1.03001
6.12883	1.06243			1.02587
6.22775	1.06559			1.02884
6.33	1.06497			1.02825
6.428	1.06239			1.02564
6.52763	1.06291			1.02606
6.62735	1.06092			1.02427
6.72723	1.0596			1.02339
6.82778	1.05954			1.0239
6.92887	1.05903			1.02243
7.0329	1.06128			1.02509
7.12668	1.05907			1.02233
7.22907	1.05898			1.02275
7.32908	1.05789			1.0217
7.42825	1.05653			1.01984
7.52913	1.05466	0.02499	72	1.0182	0.030429	68
7.62848	1.05654			1.02027
7.72713	1.05345			1.0176
7.82833	1.05335			1.01736
7.9275	1.05492			1.01803
8.02738	1.05498			1.01858
8.12977	1.05368			1.01751
8.22785	1.05375			1.01745
8.32752	1.05334			1.01723
8.4293	1.05202			1.01547
8.52778	1.05185			1.01569
8.62833	1.05125			1.01474
8.73018	1.053			1.01675
8.8303	1.05163			1.01561
8.92853	1.05074			1.01505
9.02757	1.04963			1.01399
9.12908	1.04947			1.01378
9.22887	1.0506			1.01484
9.33035	1.04963			1.01407
9.42767	1.04743			1.01214
9.52822	1.04979			1.01434
9.6275	1.04882			1.01335
9.7275	1.04678			1.01152
9.82827	1.04782			1.01277
9.93563	1.04634			1.01114
10.047	1.04857	0.02081	72	1.0134	0.0228	68
10.1477	1.04799			1.01315
10.2456	1.04696			1.01185
10.3449	1.04898			1.01392
10.436	1.04404			1.00959
10.5373	1.04851			1.01409
10.6331	1.04643			1.01198
10.7285	1.04378			1.00962
10.8287	1.04649			1.0121
10.9275	1.04304			1.00951
11.029	1.04417			1.01101
11.1316	1.04375			1.01041
11.2641	1.04161			1.00856
11.3617	1.04216			1.00907
11.4586	1.04293			1.00975
11.5573	1.04103			1.00863
11.6539	1.04221			1.00933
11.7469	1.04078			1.00842
11.8435	1.0431			1.01081
11.9405	1.04047			1.00846
12.0416	1.0405			1.00867
12.1401	1.03746			1.00598
12.2374	1.04132			1.00992
12.3292	1.03815			1.00695
12.4281	1.0392			1.00842
12.5288	1.03909	0.015905	72	1.00821	0.015969	68
12.6291	1.03878			1.00839
12.7278	1.03946			1.00893
12.8302	1.03878			1.00896
12.9272	1.03831			1.00845
13.0272	1.03873			1.00919
13.1273	1.03771			1.00841
13.2298	1.03826			1.00926
13.332	1.03649			1.00792
13.4301	1.03654			1.00818
13.5289	1.03974			1.01138
13.629	1.03628			1.00842
13.7291	1.03752			1.00965
13.8287	1.03445			1.00728
13.9292	1.03477			1.00748
14.0304	1.03503			1.00808
14.1301	1.03488			1.00823
14.2309	1.03345			1.00777
14.3351	1.03404			1.00792
14.4318	1.03524			1.00977
14.5308	1.0333			1.00846
14.6276	1.03136			1.00659
14.7271	1.0342			1.00911
14.8272	1.03309			1.00868
14.9283	1.03282			1.00839
15.0291	1.03093	0.012809	72	1.0066	0.012675	68
15.1294	1.03076			1.00706
15.2299	1.0321			1.00887
15.3291	1.03172			1.00837
15.4282	1.03012			1.00738
15.5294	1.02803			1.0056
15.6305	1.02763			1.00555
15.7314	1.02722			1.00582
15.8287	1.02723			1.0056
15.9272	1.02798			1.00695
16.0276	1.0273			1.00658
16.129	1.02788			1.00758
16.2296	1.02792			1.00773
16.3275	1.02446			1.00446
16.4293	1.0258			1.00627
16.5312	1.02737			1.00743
16.6299	1.02595			1.00654
16.7298	1.0242			1.00515
16.8304	1.02417			1.00529
16.9276	1.02482			1.00564
17.0273	1.0229			1.00467
17.1272	1.02425			1.00627
17.2281	1.02238			1.00455
17.3291	1.02239			1.00489
17.4276	1.0237			1.00648
17.5292	1.02021	0.007592	72	1.0033	0.008734	68
17.6292	1.02249			1.00523
17.7292	1.02011			1.00416
17.8273	1.0191			1.00322
17.9277	1.02011			1.0043
18.0298	1.01818			1.00247
18.1272	1.01998			1.00491
18.2285	1.0157			1.00138
18.3275	1.01978			1.00548
18.4296	1.02028			1.00643
18.5292	1.01796			1.00389
18.6305	1.01736			1.00359
18.7279	1.01622			1.00315
18.829	1.01781			1.00528
18.9287	1.01735			1.00477
19.0292	1.0171			1.00506
19.1288	1.01954			1.00715
19.2274	1.0171			1.00514
19.3271	1.01388			1.00266
19.4278	1.01427			1.00341
19.5278	1.01216			1.00183
19.6288	1.01204			1.00153
19.7276	1.00942			0.99957
19.8286	1.01224			1.00219
19.9276	1.01283			1.00329
20.0277	1.01273	0.004734	72	1.00363	0.004972	68
20.1297	1.0141			1.0051
20.2269	1.01408			1.00533
20.3275	1.01092			1.00251
20.4286	1.01261			1.00435
20.5276	1.0101			1.00212
20.6275	1.00844			1.0011
20.7278	1.00981			1.00261
20.8285	1.00704			1.00034
20.9286	1.00859			1.00184
21.0301	1.00959			1.00308
21.1284	1.00839			1.0023
21.2277	1.00834			1.00293
21.3296	1.00783			1.00212
21.4289	1.00905			1.00375
21.5275	1.00837			1.00304
21.6291	1.00929			1.00429
21.728	1.00789			1.00302
21.8277	1.01006			1.00556
21.9277	1.0103			1.00592
22.0291	1.00738			1.00343
22.1302	1.00637			1.00247
22.2291	1.00684			1.00351
22.3294	1.00591			1.00228
22.4305	1.00655			1.00344
22.5282	1.00546	0.003137	72	1.00258	0.002648	68
22.6281	1.0039			1.00125
22.729	1.00182			0.999429
22.8303	1.00403			1.00174
22.9276	1.00217			0.999879
23.0276	1.00207			1.00039
23.1275	1.00233			1.00069
23.2281	1.00425			1.00281
23.329	1.00135			1.00041
23.4276	1.0013			1.00031
23.5272	1.0004			0.999453
23.6279	1.00034			0.999488
23.7286	0.999311			0.999158
23.8286	1.00024			1.00026
23.9275	1.00023			1.00021
24.0298	1.00074			1.00086
24.1301	0.999662			1.00005
24.2289	1.00013			1.00042
24.3315	1.00061			1.0012
24.4278	1.0002			1.00106
24.5293	0.999431			1.0003
24.6286	0.998717			0.999416
24.7288	0.998885			1.00021
24.8281	0.996548			0.99798
24.9279	0.993282			0.995341
25.0303	0.99796	0.004149	72	0.999154	0.003755	68
25.1274	0.996209			0.997988
25.2299	0.996378			0.998423
25.3281	0.995942			0.998092
25.4284	0.997113			0.999404
25.5279	0.997504			0.999552
25.6303	0.995773			0.998102
25.7304	0.997551			0.99911
25.8282	0.998081			0.998858
25.9295	0.997233			0.996458
26.0282	0.997149			0.994419
26.1307	1.00106			0.995649
26.2306	1.00268			0.994158
26.3286	1.00519			0.992799
26.4311	1.00954			0.992625
26.5297	1.01406			0.992189
26.6272	1.02179			0.994911
26.7298	1.02637			0.993626
26.829	1.03386			0.995215
26.9299	1.03824			0.994182
27.0307	1.04833			0.997265
27.1309	1.05608			0.999466
27.2279	1.06537			1.00224
27.3278	1.07238			1.00331
27.4319	1.08277			1.0079
27.5275	1.09068	0.070877	72	1.0105	0.033891	68
27.6293	1.10036			1.01482
27.7285	1.10837			1.01831
27.8289	1.11477			1.02039
27.9275	1.12141			1.02324
28.0291	1.12787			1.02658
28.1278	1.13466			1.03043
28.2379	1.1429			1.0358
28.3389	1.14658			1.03758
28.4526	1.154			1.04345
28.5491	1.15783			1.04507
28.6443	1.16359			1.04929
28.7543	1.16707			1.05217
28.8463	1.17355			1.05742
28.9418	1.17905			1.06133
29.0446	1.17806			1.06054
29.1413	1.18478			1.06602
29.2398	1.18667			1.06702
29.3377	1.19069			1.07072
29.4298	1.19228			1.07231
29.5294	1.19665			1.07626
29.6286	1.19845			1.07757
29.7281	1.20149			1.08076
29.83	1.20473			1.0838
29.9298	1.2091			1.08779
30.0293	1.20768	0.091146	72	1.08669	0.052843	68
30.1279	1.21077			1.08994
30.2292	1.21253			1.09151
30.3275	1.21174			1.09141
30.4295	1.2148			1.0942
30.5294	1.21741			1.09704
30.629	1.21713			1.09749
30.7295	1.2188			1.09904
30.829	1.22085			1.10162
30.9278	1.22247			1.10354
31.0279	1.22186			1.10389
31.1293	1.22225			1.10479
31.2279	1.22318			1.10542
31.3285	1.22395			1.10713
31.4279	1.2267			1.11015
31.5291	1.22622			1.11013
31.6286	1.22642			1.11131
31.7299	1.2236			1.10925
31.8285	1.22781			1.11404
31.9283	1.22844			1.11428
32.0294	1.22852			1.11549
32.1282	1.23087			1.1177
32.2291	1.22639			1.11439
32.3291	1.22783			1.11637
32.4293	1.2285			1.11688
32.5286	1.22943	0.08671	72	1.11841	0.056856	68
32.6289	1.22646			1.1164
32.7303	1.2287			1.11834
32.8288	1.23126			1.12101
32.9313	1.22757			1.11876
33.0305	1.22801			1.11893
33.1281	1.22702			1.1189
33.2295	1.22822			1.11991
33.3281	1.22849			1.12054
33.4278	1.22706			1.11912
33.5279	1.2272			1.11995
33.6276	1.23151			1.12401
33.7276	1.22978			1.12277
33.8297	1.22897			1.12215
33.9282	1.22908			1.12226
34.0281	1.22837			1.12121
34.1278	1.22822			1.12127
34.2274	1.23132			1.12411
34.328	1.22976			1.12291
34.4285	1.23353			1.12653
34.5282	1.23021			1.12342
34.6283	1.23208			1.12513
34.7286	1.23258			1.12481
34.8287	1.23337			1.12646
34.928	1.23348			1.12583
35.028	1.23387	0.083982	72	1.12579	0.059173	68
35.1276	1.23252			1.12471
35.2291	1.23487			1.12626
35.3283	1.23532			1.12656
35.4273	1.237			1.12789
35.5288	1.23588			1.12662
35.628	1.23654			1.12651
35.7278	1.23684			1.12652
35.8287	1.24067			1.12973
35.9278	1.23754			1.12671
36.028	1.23705			1.12539
36.1283	1.23842			1.1262
36.2285	1.23762			1.12531
36.3297	1.23985			1.12696
36.4284	1.2399			1.12615
36.5279	1.24118			1.12656
36.6282	1.24397			1.12864
36.7278	1.24277			1.12731
36.828	1.24463			1.12801
36.9275	1.24404			1.12722
37.0277	1.24385			1.12668
37.1278	1.24837			1.12991
37.2283	1.24678			1.12813
37.3297	1.24726			1.12782
37.4298	1.24958			1.12992
37.5278	1.24901	0.096338	72	1.12882	0.062148	68
37.629	1.24991			1.12904
37.7278	1.24914			1.12763
37.8283	1.25131			1.12942
37.9294	1.25126			1.12874
38.0291	1.25301			1.12986
38.1279	1.25402			1.1296
38.2276	1.25499			1.13069
38.3288	1.25527			1.13015
38.4297	1.25607			1.13003
38.5291	1.25564			1.12976
38.629	1.25706			1.1298
38.728	1.25823			1.1303
38.828	1.25845			1.13006
38.9293	1.26028			1.13164
39.0278	1.26149			1.13211
39.1281	1.26132			1.13136
39.2285	1.26372			1.13334
39.3304	1.26282			1.13228
39.4286	1.26581			1.13413
39.5301	1.26522			1.13405
39.6277	1.26673			1.13515
39.7289	1.26539			1.13316
39.8292	1.26674			1.1338
39.9281	1.26668			1.13304
40.0278	1.27087	0.115041	72	1.13666	0.068725	68
40.1281	1.26677			1.13301
40.2285	1.2959			1.15607
40.333	1.30859			1.15789
40.4331	1.30818			1.15716
40.5334	1.39086			1.20354
40.6339	1.38534			1.19887
40.7902	1.39738			1.20804
40.8888	1.39956			1.20841
40.9837	1.39809			1.20712
41.0821	1.40061			1.20843
41.1893	1.40542			1.21203
	1.39953			1.20667
	1.40723			1.21185
	1.40609			1.21132
	1.4021			1.20705
	1.40274			1.20719
	1.40697			1.21035
	1.40957			1.21238
	1.40112			1.20503
	1.40834			1.2104
	1.40729			1.20909
	1.42228			1.22168
			0			0
			0			0
			0			0

## Sheet: 4H
Average Traces
Time [m]	WT +PKa			KO +PKa
	Mean	SD	N	Mean	SD	N
0.0307	1.08032	0.070572	68	1.05751	0.058363	71
0.129067	1.09534			1.07511
0.235833	1.1016			1.07852
0.329167	1.1025			1.08027
0.43415	1.10122			1.08046
0.528817	1.10095			1.07929
0.6961	1.10261			1.08272
0.771433	1.10251			1.08171
0.846633	1.10206			1.0801
0.945917	1.10164			1.08116
1.03018	1.10067			1.07973
1.13782	1.1033			1.08191
1.2298	1.10181			1.08041
1.35282	1.10354			1.0827
1.42965	1.10531			1.08385
1.53358	1.10638			1.08462
1.65003	1.10719			1.08508
1.73202	1.10653			1.08454
1.86402	1.10781			1.08438
1.93695	1.10513			1.08212
2.03863	1.10735			1.0835
2.13347	1.10961			1.0875
2.23788	1.11334			1.08956
2.32957	1.11085			1.08734
2.43043	1.11435			1.0909
2.53088	1.11414	0.09364	68	1.09051	0.091176	71
2.63068	1.11271			1.09076
2.7297	1.11211			1.09021
2.83127	1.11223			1.08937
2.93143	1.11246			1.08971
3.0295	1.11251			1.09022
3.13022	1.11236			1.08964
3.2299	1.1139			1.09009
3.33083	1.11242			1.08883
3.4316	1.11295			1.0892
3.5314	1.11201			1.08876
3.63158	1.10927			1.08642
3.73127	1.11132			1.088
3.83108	1.11289			1.08978
3.9313	1.11001			1.09244
4.0314	1.11044			1.0939
4.13132	1.11109			1.1
4.23135	1.10723			1.09732
4.331	1.11019			1.09213
4.43193	1.10717			1.08739
4.52935	1.10682			1.08683
4.62927	1.1046			1.08544
4.72918	1.10441			1.08596
4.83003	1.10308			1.08448
4.92938	1.10226			1.08097
5.03082	1.10015	0.102476	68	1.07907	0.098018	71
5.1309	1.09753			1.07556
5.23158	1.09819			1.07839
5.33117	1.09436			1.07443
5.42945	1.09665			1.0763
5.53038	1.09445			1.07291
5.6323	1.09237			1.07034
5.73108	1.09566			1.07349
5.82893	1.09491			1.07485
5.9298	1.09216			1.07272
6.02978	1.09281			1.0719
6.1291	1.08868			1.06808
6.23013	1.09154			1.07149
6.32958	1.09148			1.07124
6.43063	1.09031			1.0708
6.53023	1.08869			1.07037
6.63003	1.08786			1.07014
6.73108	1.08873			1.07058
6.83123	1.08761			1.07049
6.92957	1.08856			1.07079
7.02998	1.08755			1.0699
7.13038	1.08469			1.06791
7.2297	1.08171			1.06607
7.3306	1.08314			1.06738
7.43123	1.08289			1.06792
7.53188	1.08286	0.082952	68	1.06863	0.080525	71
7.63132	1.07986			1.06621
7.73147	1.08042			1.0651
7.83222	1.07893			1.06398
7.93185	1.0775			1.06286
8.03103	1.07585			1.06148
8.13058	1.07562			1.06078
8.23287	1.07464			1.05967
8.3295	1.07448			1.05954
8.42908	1.07454			1.05925
8.53048	1.07313			1.05764
8.6306	1.07261			1.05831
8.73108	1.07233			1.05757
8.8316	1.07141			1.05636
8.9293	1.06938			1.0556
9.03077	1.06893			1.05504
9.13042	1.06585			1.05166
9.23292	1.07021			1.0531
9.32887	1.06812			1.05097
9.43005	1.06448			1.05033
9.52998	1.06674			1.05318
9.62915	1.06295			1.04994
9.73067	1.06671			1.05285
9.83068	1.06656			1.05245
9.9307	1.06466			1.05158
10.0305	1.06384	0.060438	68	1.05037	0.061233	71
10.1302	1.06421			1.05082
10.2318	1.06447			1.0507
10.3293	1.05645			1.04317
10.4294	1.05784			1.0451
10.5303	1.06236			1.04962
10.6293	1.05838			1.04668
10.7304	1.06071			1.04824
10.831	1.05401			1.04214
10.9301	1.05307			1.04148
11.0302	1.05435			1.04254
11.1302	1.05349			1.04186
11.2294	1.05197			1.04023
11.3305	1.05201			1.04022
11.4309	1.05008			1.03861
11.5305	1.05085			1.03961
11.6303	1.05096			1.04022
11.7291	1.04852			1.03763
11.829	1.04677			1.03639
11.9293	1.04811			1.03752
12.0307	1.04699			1.03619
12.1308	1.0469			1.03606
12.2314	1.04677			1.036
12.3296	1.04756			1.03669
12.4308	1.04636			1.03611
12.5305	1.0448	0.047442	68	1.03468	0.052371	71
12.6306	1.04523			1.03491
12.7303	1.04389			1.03438
12.8328	1.0435			1.03384
12.9298	1.04083			1.03392
13.0308	1.04057			1.0335
13.1292	1.04035			1.03354
13.2297	1.04082			1.03391
13.3303	1.04029			1.03392
13.4326	1.03937			1.03232
13.53	1.03899			1.03239
13.6301	1.03767			1.02702
13.7304	1.0376			1.02659
13.831	1.03924			1.02881
13.9308	1.03714			1.02701
14.0291	1.03581			1.02661
14.1302	1.03704			1.02861
14.2294	1.03511			1.02742
14.3307	1.03809			1.02926
14.4302	1.0344			1.02629
14.5296	1.03445			1.02591
14.6306	1.03317			1.02497
14.731	1.03432			1.02793
14.8312	1.03391			1.02735
14.9301	1.03405			1.02727
15.0298	1.03504	0.033931	68	1.02775	0.034903	71
15.1297	1.0331			1.02621
15.2307	1.03011			1.02364
15.3331	1.03219			1.02528
15.4311	1.03112			1.02447
15.5305	1.03034			1.02367
15.6328	1.03071			1.02378
15.7322	1.03065			1.02375
15.832	1.02851			1.02171
15.9308	1.02889			1.0225
16.0292	1.02886			1.02251
16.1309	1.02726			1.02102
16.2305	1.02924			1.02309
16.33	1.02724			1.02106
16.4309	1.02513			1.01933
16.5315	1.02764			1.02182
16.6298	1.02725			1.02176
16.7298	1.02693			1.02194
16.8305	1.02616			1.0212
16.933	1.02494			1.02014
17.0308	1.02704			1.02177
17.1297	1.02519			1.0204
17.2313	1.02395			1.01862
17.3318	1.02384			1.01872
17.4295	1.02432			1.01979
17.5305	1.0248	0.023266	68	1.01912	0.024798	71
17.6304	1.02457			1.019
17.7326	1.02372			1.0183
17.8298	1.02455			1.01919
17.9306	1.02351			1.01846
18.0307	1.02196			1.01651
18.1305	1.02564			1.02124
18.2306	1.02426			1.01919
18.3316	1.02241			1.0175
18.4319	1.02193			1.01768
18.5313	1.02442			1.01956
18.6295	1.02201			1.01799
18.7292	1.02363			1.019
18.8296	1.02188			1.01795
18.9311	1.02432			1.02077
19.0314	1.02442			1.02148
19.1313	1.02384			1.0211
19.2305	1.02472			1.02157
19.3303	1.02483			1.02195
19.4307	1.02473			1.02183
19.5294	1.02253			1.01882
19.6304	1.0222			1.01893
19.7302	1.02286			1.01972
19.8292	1.02023			1.0182
19.9296	1.02274			1.01903
20.0305	1.02324	0.026581	68	1.01998	0.026778	71
20.1297	1.02347			1.02045
20.2306	1.02326			1.02017
20.3305	1.02259			1.02099
20.4307	1.02279			1.02204
20.531	1.02311			1.01907
20.6293	1.02442			1.02087
20.7312	1.02332			1.01916
20.829	1.02363			1.01977
20.9295	1.02373			1.0198
21.03	1.02378			1.01933
21.1309	1.0239			1.01971
21.2299	1.02258			1.01862
21.3308	1.02328			1.01924
21.4306	1.02239			1.01853
21.5292	1.0222			1.01761
21.6295	1.02239			1.01753
21.7293	1.01749			1.01391
21.83	1.01742			1.01446
21.9288	1.01724			1.01426
22.0304	1.0158			1.01246
22.1321	1.017			1.01352
22.231	1.01787			1.01519
22.3298	1.0167			1.01332
22.43	1.01734			1.01506
22.53	1.01649	0.018863	68	1.01371	0.013941	71
22.6293	1.01641			1.01341
22.7307	1.01609			1.01287
22.8304	1.01518			1.01308
22.9301	1.01478			1.01192
23.0299	1.01451			1.01155
23.1307	1.01447			1.01205
23.2309	1.01548			1.01352
23.3307	1.01558			1.01405
23.431	1.01499			1.01383
23.5313	1.01261			1.0105
23.6313	1.01427			1.01225
23.7321	1.01404			1.01285
23.8315	1.01518			1.01434
23.9301	1.01392			1.01211
24.0306	1.01324			1.01171
24.1324	1.01388			1.01323
24.232	1.01291			1.01219
24.3316	1.01157			1.01048
24.4294	1.01027			1.01012
24.5308	1.01168			1.01059
24.6298	1.01147			1.01096
24.7307	1.01194			1.0112
24.8303	1.01236			1.01218
24.9294	1.01241			1.01248
25.0307	1.01163	0.017802	68	1.01106	0.019472	71
25.1306	1.01063			1.01042
25.2308	1.01049			1.01068
25.3301	1.01044			1.01032
25.4306	1.00994			1.00946
25.5304	1.01046			1.01026
25.6298	1.01016			1.01005
25.7293	1.00936			1.00925
25.8294	1.00924			1.00886
25.9304	1.01049			1.01035
26.0325	1.00933			1.00947
26.1318	1.00894			1.00888
26.2295	1.00929			1.00865
26.3297	1.00791			1.00814
26.4306	1.0084			1.00812
26.5302	1.00696			1.0073
26.6312	1.00794			1.00758
26.732	1.00698			1.0067
26.8321	1.00659			1.00635
26.9328	1.00674			1.00668
27.0296	1.0081			1.00773
27.131	1.00664			1.00678
27.2313	1.00692			1.00689
27.3301	1.00701			1.00707
27.4319	1.00715			1.00685
27.529	1.00652	0.018142	68	1.0067	0.019984	71
27.6298	1.00838			1.00794
27.7294	1.00713			1.00675
27.834	1.0075			1.00738
27.9353	1.00616			1.00644
28.0312	1.00728			1.00716
28.1337	1.00615			1.00583
28.2332	1.00341			1.00418
28.3357	1.00112			1.00284
28.4363	1.00214			1.0042
28.5391	1.00252			1.00456
28.6319	1.00104			1.00302
28.7421	1.00061			1.0027
28.83	1.00102			1.00119
28.9306	1.00104			1.0009
29.0307	1.00052			1.00078
29.1299	1.00039			1.00064
29.2307	0.999288			0.999597
29.3305	0.997952			0.998147
29.4312	0.999125			0.999588
29.5302	0.998498			0.998952
29.6295	0.998034			0.998535
29.73	0.998724			0.998569
29.8302	0.997134			0.997397
29.9312	0.997936			0.998638
30.0295	0.998063	0.002991	68	0.997697	0.002859	71
30.1307	0.997609			0.997688
30.2301	0.997316			0.99708
30.3295	0.997233			0.997333
30.4311	0.997229			0.99676
30.5316	0.996691			0.997384
30.6311	0.997464			0.997342
30.7293	0.997354			0.997354
30.8306	0.997303			0.997326
30.9299	0.996795			0.997066
31.0299	0.997812			0.99793
31.1293	0.999979			0.999766
31.2291	1.00028			1.0003
31.3311	1.00218			1.00191
31.4321	1.0043			1.00469
31.5312	1.00866			1.00926
31.6313	1.01136			1.01119
31.7307	1.01527			1.01554
31.829	1.01871			1.01916
31.9298	1.02442			1.02442
32.0296	1.02832			1.02821
32.1309	1.03172			1.03159
32.2313	1.03688			1.03709
32.3309	1.04061			1.04061
32.4319	1.04587			1.04591
32.5316	1.05004	0.036773	68	1.04988	0.035314	71
32.6297	1.05582			1.05548
32.7306	1.05959			1.05905
32.8313	1.06582			1.0648
32.9317	1.07026			1.06906
33.0306	1.07345			1.07188
33.1302	1.08062			1.07823
33.2291	1.08486			1.08212
33.3306	1.08932			1.08591
33.4301	1.0931			1.08951
33.5295	1.09771			1.09314
33.6307	1.10001			1.09535
33.7307	1.10402			1.09881
33.832	1.10688			1.10133
33.9308	1.10902			1.10338
34.0309	1.11272			1.10612
34.1319	1.11452			1.10775
34.2306	1.1169			1.10992
34.3295	1.11929			1.1118
34.4311	1.12077			1.11306
34.5296	1.12181			1.11403
34.6309	1.12335			1.11583
34.7292	1.1256			1.11728
34.8302	1.12596			1.11773
34.93	1.12736			1.11874
35.0295	1.12814	0.050245	68	1.11957	0.042028	71
35.1296	1.12869			1.11972
35.2295	1.12858			1.12006
35.3306	1.12897			1.12047
35.4306	1.12965			1.12072
35.5297	1.12876			1.12075
35.6294	1.12903			1.12058
35.7306	1.12786			1.11976
35.8307	1.12753			1.11875
35.9308	1.13023			1.1214
36.0299	1.12925			1.12044
36.1294	1.12819			1.11953
36.2309	1.12974			1.12143
36.3295	1.12883			1.11999
36.431	1.12876			1.12023
36.5309	1.1302			1.12137
36.6294	1.1302			1.12163
36.7291	1.13023			1.12158
36.8291	1.13043			1.12174
36.9305	1.13041			1.12186
37.0311	1.13057			1.12163
37.1317	1.13052			1.12207
37.2299	1.13114			1.1226
37.3294	1.13182			1.12282
37.4293	1.13309			1.12499
37.5296	1.13275	0.04936	68	1.1241	0.044141	71
37.6294	1.13241			1.12365
37.7305	1.12943			1.12152
37.8304	1.13273			1.12349
37.9292	1.13197			1.12326
38.0296	1.1337			1.12467
38.1309	1.13309			1.12481
38.2312	1.13341			1.12474
38.3289	1.13573			1.1267
38.4294	1.13536			1.12689
38.5294	1.13429			1.12549
38.6293	1.13501			1.12671
38.7307	1.13581			1.12704
38.8296	1.13582			1.12713
38.9295	1.13669			1.12779
39.0308	1.13751			1.12868
39.1295	1.13967			1.13044
39.2296	1.14004			1.1305
39.3309	1.13987			1.13091
39.4318	1.13963			1.1302
39.5321	1.1398			1.13075
39.6318	1.14045			1.13117
39.7318	1.1425			1.13289
39.8304	1.14069			1.1314
39.929	1.14169			1.13217
40.0306	1.14251	0.052385	68	1.1334	0.046567	71
40.1293	1.14335			1.13483
40.229	1.14541			1.13596
40.3293	1.14339			1.13445
40.431	1.14594			1.13657
40.5294	1.14829			1.13791
40.6311	1.14693			1.13705
40.7318	1.14717			1.13767
40.8317	1.14618			1.13727
40.9312	1.14911			1.13949
41.0296	1.15058			1.14133
41.1309	1.15267			1.14306
41.2295	1.15098			1.14138
41.3306	1.15293			1.14286
41.43	1.15227			1.14198
41.5301	1.15327			1.14332
41.6303	1.15473			1.14455
41.7296	1.15634			1.14554
41.8302	1.15688			1.14651
41.9301	1.1545			1.14418
42.0292	1.158			1.14791
42.131	1.15816			1.14799
42.23	1.15787			1.14878
42.3291	1.15879			1.14914
42.4303	1.15823			1.14894
42.5296	1.15904	0.057849	68	1.1493	0.051312	71
42.629	1.15793			1.14774
42.7294	1.15559			1.14536
42.8306	1.15999			1.14946
42.9299	1.16154			1.15071
43.0298	1.16204			1.15141
43.1293	1.16062			1.14932
43.2312	1.16366			1.15285
43.3319	1.16099			1.15082
43.4304	1.1625			1.1515
43.5303	1.16177			1.15093
43.6305	1.1647			1.15368
43.7295	1.16501			1.15343
43.8312	1.16871			1.15659
43.9307	1.17008			1.15778
44.0294	1.16834			1.15635
44.1307	1.17153			1.15945
44.2299	1.17386			1.1618
44.3306	1.17292			1.1611
44.4309	1.17588			1.16403
44.5314	1.17638			1.1643
44.6298	1.17727			1.16508
44.7305	1.17782			1.16575
44.8306	1.1778			1.16571
44.9303	1.18073			1.16854
45.0296	1.17968	0.070178	68	1.16762	0.059851	71
45.1302	1.18041			1.16836
45.2308	1.1802			1.16777
45.3305	1.18223			1.17019
45.4304	1.18364			1.17144
45.5303	1.18481			1.17241
45.6307	1.18486			1.17236
45.7306	1.18548			1.17261
45.8301	1.18416			1.17175
45.9304	1.18414			1.17153
46.0294	1.1863			1.17377
46.1306	1.18735			1.17504
46.23	1.18925			1.17668
46.3308	1.18874			1.17613
46.4294	1.191			1.17857
46.5294	1.18946			1.1772
46.6298	1.1893			1.17725
46.7295	1.19113			1.17879
46.8296	1.18934			1.17774
46.9295	1.19012			1.17854
47.0294	1.19133			1.17953
47.1295	1.19267			1.18043
47.2309	1.19308			1.18136
47.3295	1.19173			1.18068
47.4297	1.19489			1.18376
47.5301	1.19327	0.071569	68	1.18213	0.065084	71
47.6292	1.19338			1.18217
47.7311	1.19173			1.18111
47.8314	1.19184			1.18125
47.9308	1.19132			1.18081
48.0299	1.19245			1.18191
48.1296	1.19288			1.18279
48.2304	1.19408			1.18374
48.3293	1.19284			1.18318
48.4311	1.19192			1.18213
48.5308	1.1911			1.18113
48.6293	1.19226			1.18145
48.7294	1.19196			1.18213
48.8295	1.1924
48.931	1.19254
49.0311	1.19311
49.131	1.19333
49.2311	1.19365
49.3319	1.19367
49.4319	1.19326
49.5307	1.19408

## Sheet: 4I
Average Traces
Time [m]	WT +PKa			KO +PKa
	Mean	SD	N	Mean	SD	N
0.0276	1.14051	0.056131	51	1.142	0.06275	51
0.129617	1.12691			1.12806
0.229183	1.1254			1.12674
0.329133	1.12151			1.12175
0.430467	1.11857			1.11881
0.53025	1.11251			1.1125
0.6306	1.10529			1.10462
0.730267	1.10066			1.10085
0.8294	1.09771			1.09756
0.93065	1.09268			1.09268
1.03033	1.08938			1.08961
1.1293	1.08964			1.08961
1.23082	1.08923			1.08947
1.33018	1.08521			1.08552
1.42873	1.08675			1.08658
1.5305	1.08538			1.08499
1.63057	1.08169			1.08166
1.73048	1.08136			1.08169
1.82902	1.07749			1.07797
1.9292	1.07886			1.08051
2.02892	1.07744			1.07836
2.12905	1.07903			1.08033
2.2292	1.07729			1.07824
2.33005	1.07843			1.07942
2.42928	1.07264			1.07327
2.53007	1.06912	0.042831	51	1.07006	0.034727	51
2.62932	1.07012			1.07177
2.73033	1.06281			1.06472
2.82933	1.06085			1.06218
2.93033	1.05884			1.06117
3.0292	1.05718			1.05938
3.12953	1.05224			1.05484
3.23018	1.05282			1.05497
3.32845	1.0499			1.0524
3.43083	1.04651			1.0489
3.53022	1.04387			1.04606
3.62938	1.03953			1.04195
3.72927	1.03764			1.03995
3.82883	1.03426			1.03685
3.92917	1.03244			1.03529
4.03038	1.02949			1.03252
4.13067	1.02631			1.0293
4.2289	1.02439			1.02815
4.32922	1.0233			1.02719
4.42897	1.02157			1.02564
4.52882	1.02192			1.02618
4.63162	1.01823			1.02345
4.73018	1.01737			1.02246
4.82923	1.01584			1.02101
4.93055	1.01402			1.01916
5.03007	1.01093	0.031844	51	1.01616	0.021219	51
5.13038	1.01175			1.01785
5.23023	1.00905			1.01524
5.33033	1.01114			1.01682
5.43065	1.00904			1.0155
5.53053	1.00791			1.01395
5.63048	1.00727			1.01403
5.73052	1.00522			1.01205
5.83032	1.00538			1.01238
5.92963	1.00398			1.01128
6.03083	1.00239			1.01023
6.1307	1.00217			1.00994
6.2305	0.99876			1.00643
6.33042	0.999798			1.00769
6.42912	0.996549			1.00545
6.52907	0.996613			1.00548
6.62907	0.997335			1.00674
6.72857	0.997049			1.00646
6.82923	0.995365			1.00462
6.93055	0.997801			1.0064
7.0309	0.994354			1.00376
7.13075	0.992899			1.00267
7.23038	0.993903			1.00304
7.33002	0.991191			1.0009
7.4291	0.990386			1.00021
7.52898	0.993934	0.031815	51	1.00378	0.019776	51
7.62902	0.992487			1.00224
7.72955	0.992773			1.00215
7.83023	0.994259			1.00403
7.93055	0.991704			1.00156
8.03042	0.991143			1.00099
8.13062	0.990187			1.00047
8.23043	0.988673			0.998861
8.33037	0.988475			0.998514
8.43025	0.988214			0.997952
8.52927	0.984277			0.994881
8.6304	0.986484			0.996527
8.73045	0.983514			0.993047
8.83002	0.984284			0.994787
8.93047	0.982939			0.993884
9.03015	0.983416			0.994267
9.12918	0.986855			0.997898
9.23055	0.985934			0.997286
9.33017	0.985185			0.996317
9.42898	0.984867			0.996571
9.52928	0.985678			0.996679
9.62953	0.986726			0.998134
9.72935	0.987321			0.998488
9.82915	0.986228			0.997322
9.93038	0.985173			0.996226
10.0297	0.985144	0.026297	51	0.996021	0.015484	51
10.1291	0.981875			0.99339
10.229	0.982713			0.993858
10.3286	0.979228			0.990475
10.4291	0.981093			0.992662
10.5287	0.980094			0.99141
10.6292	0.98174			0.993638
10.7302	0.982813			0.994972
10.8286	0.980322			0.992267
10.9288	0.981757			0.994158
11.0289	0.983469			0.995671
11.1291	0.981962			0.994458
11.2294	0.984657			0.996515
11.3305	0.984664			0.996426
11.4293	0.982689			0.994134
11.5309	0.98116			0.992748
11.6303	0.981408			0.992935
11.7293	0.978627			0.990309
11.829	0.979734			0.991652
11.9286	0.979758			0.991756
12.029	0.977984			0.989882
12.1293	0.979175			0.990703
12.2293	0.979712			0.992132
12.3306	0.980938			0.992886
12.4309	0.980925			0.993167
12.5304	0.981478	0.023999	51	0.993671	0.015241	51
12.63	0.982326			0.993867
12.7293	0.980038			0.991848
12.8302	0.982822			0.994577
12.9291	0.981438			0.993279
13.0289	0.98137			0.992935
13.1294	0.98065			0.991373
13.2303	0.981507			0.993024
13.3303	0.980453			0.991928
13.4287	0.980355			0.991641
13.5292	0.979218			0.990932
13.6305	0.978226			0.990014
13.7305	0.977968			0.989206
13.8304	0.976807			0.988315
13.9309	0.978679			0.990205
14.0308	0.979415			0.990727
14.1302	0.979487			0.990558
14.2291	0.979052			0.990381
14.3288	0.980626			0.991749
14.4309	0.979959			0.991303
14.5306	0.981045			0.991723
14.6306	0.977542			0.988462
14.7305	0.98039			0.99148
14.8303	0.978349			0.989068
14.9305	0.980844			0.99139
15.0301	0.98034	0.022711	51	0.991114	0.014373	51
15.1292	0.977846			0.988217
15.2309	0.978957			0.989115
15.3302	0.979107			0.989423
15.4289	0.976608			0.987056
15.5286	0.976699			0.98725
15.6323	0.975864			0.986669
15.7307	0.977078			0.987922
15.83	0.978158			0.988348
15.9302	0.975747			0.986029
16.0281	0.97813			0.988413
16.1302	0.976021			0.986602
16.2318	0.975252			0.985573
16.3303	0.977043			0.986717
16.4301	0.975836			0.986456
16.5292	0.977762			0.988108
16.6292	0.974662			0.985233
16.7298	0.974114			0.984723
16.831	0.975058			0.985486
16.9304	0.977562			0.988074
17.0288	0.975357			0.985872
17.1292	0.978026			0.988593
17.2305	0.976493			0.986667
17.3303	0.973982			0.984403
17.4288	0.977014			0.987007
17.5291	0.976961	0.018779	51	0.986919	0.011393	51
17.6292	0.973961			0.984047
17.7299	0.978007			0.987717
17.8308	0.976284			0.985772
17.9301	0.977591			0.987
18.0287	0.977611			0.987091
18.1296	0.979237			0.988277
18.2305	0.976949			0.986535
18.3302	0.979834			0.989183
18.4291	0.977632			0.986979
18.5289	0.979785			0.988959
18.6289	0.980808			0.989833
18.7306	0.979296			0.988438
18.8306	0.979176			0.988167
18.9302	0.981561			0.990328
19.0292	0.981087			0.990277
19.1311	0.979946			0.989093
19.231	0.981912			0.991175
19.3307	0.983769			0.992558
19.4303	0.984531			0.99302
19.5305	0.983193			0.991299
19.6306	0.982945			0.991626
19.7306	0.983676			0.992073
19.8307	0.982645			0.990855
19.9303	0.982702			0.991178
20.0292	0.981887	0.016171	51	0.990012	0.009339	51
20.1293	0.981583			0.989711
20.2306	0.983921			0.991742
20.3302	0.983864			0.991134
20.4292	0.9839			0.991466
20.5295	0.982793			0.990693
20.6294	0.985298			0.99233
20.7306	0.986373			0.993792
20.8304	0.985075			0.992177
20.9287	0.987515			0.994431
21.0291	0.986986			0.993627
21.1299	0.986762			0.993454
21.2308	0.98732			0.994115
21.3297	0.986348			0.992753
21.429	0.989243			0.995792
21.5289	0.986279			0.99305
21.6304	0.987713			0.994346
21.7293	0.986832			0.992825
21.8306	0.986077			0.992109
21.9304	0.98586			0.991794
22.0289	0.987159			0.992837
22.1304	0.985666			0.991396
22.2295	0.986853			0.992303
22.3303	0.987342			0.992948
22.4304	0.987118			0.991938
22.5293	0.987645	0.01246	51	0.992813	0.00747	51
22.6295	0.986461			0.991607
22.7311	0.988955			0.993727
22.8304	0.988222			0.993374
22.9302	0.98858			0.993422
23.0289	0.988381			0.993321
23.1306	0.987244			0.992108
23.2303	0.986885			0.993258
23.3307	0.989109			0.993161
23.4308	0.991297			0.995227
23.5303	0.990061			0.994166
23.6311	0.989605			0.994133
23.7289	0.989462			0.994276
23.8305	0.991277			0.995384
23.9304	0.990677			0.994978
24.0292	0.99073			0.995414
24.1293	0.992057			0.996038
24.2306	0.988581			0.993371
24.3299	0.990192			0.994633
24.429	0.992333			0.996565
24.5303	0.992244			0.996005
24.6309	0.993098			0.996936
24.7302	0.994241			0.997767
24.8305	0.993273			0.997077
24.931	0.992892			0.996531
25.0297	0.995092	0.010634	51	0.998251	0.007274	51
25.1309	0.992721			0.995904
25.2303	0.993152			0.995988
25.3308	0.995139			0.998327
25.4305	0.994055			0.997399
25.5314	0.995062			0.997934
25.63	0.997771			1.0019
25.7315	0.995524			0.998586
25.8287	0.997495			0.999578
25.929	0.997832			1.00018
26.0292	0.999006			1.00004
26.1332	0.99713			0.999228
26.2319	0.99611			0.998231
26.3306	0.999536			1.00113
26.4302	0.99875			1.0008
26.5312	0.999063			1.00064
26.6296	0.997151			0.998734
26.7307	0.999369			1.0006
26.8298	0.997333			0.998632
26.9323	0.997275			0.998794
27.0318	0.99753			0.998698
27.1319	0.998644			0.999739
27.2295	0.998933			1.00009
27.3294	0.997303			0.99866
27.4306	0.997969			0.999545
27.5313	0.995074	0.005778	51	0.997017	0.004459	51
27.6299	0.996785			0.998447
27.7305	0.99892			1.0013
27.8293	0.997535			0.998804
27.9302	0.998981			1.0002
28.031	0.998944			1.00017
28.1298	0.999058			1.0002
28.2305	0.99863			0.999168
28.3305	1.00024			1.00142
28.4307	0.998849			0.999436
28.5305	1.00046			1.00118
28.6305	0.996519			0.997325
28.7297	0.998288			0.998578
28.8289	0.999093			0.999603
28.9306	1.00168			1.00179
29.0306	1.00225			1.00178
29.1294	1.00061			1.00039
29.2306	1.00048			0.999839
29.3305	1.00062			0.999951
29.4309	0.999819			0.999175
29.5289	1.00255			1.00182
29.6306	0.998571			0.997921
29.7286	1.00146			1.00027
29.8288	1.00136			1.00043
29.9325	0.999074			0.997945
30.0286	1.00118	0.003124	51	1.00014	0.002618	51
30.1328	0.997551			0.997243
30.2294	0.996318			0.995454
30.3305	0.997592			0.996534
30.4306	0.996607			0.995704
30.5308	0.996684			0.996179
30.63	0.995537			0.994953
30.7299	0.999934			0.999392
30.8302	0.99993			0.999865
30.9305	1.00141			1.00139
31.0308	1.00263			1.00367
31.1298	1.00734			1.00905
31.2303	1.00969			1.01282
31.3308	1.01846			1.02211
31.4308	1.02355			1.02825
31.5288	1.03087			1.03621
31.6307	1.03721			1.04264
31.7305	1.04925			1.05331
31.8306	1.0632			1.06685
31.9305	1.07219			1.07525
32.0305	1.08779			1.08841
32.1295	1.10195			1.1004
32.2301	1.1166			1.11295
32.3303	1.13604			1.12926
32.4303	1.15287			1.14328
32.5299	1.16409	0.060859	51	1.15353	0.082503	51
32.6303	1.18372			1.1702
32.7298	1.19778			1.18269
32.8306	1.21259			1.19615
32.9303	1.22374			1.20547
33.0306	1.23584			1.21652
33.13	1.24531			1.22498
33.2299	1.26065			1.23808
33.3294	1.26841			1.24436
33.4288	1.27574			1.25056
33.5297	1.28283			1.25612
33.6307	1.28931			1.26197
33.7296	1.28998			1.26035
33.8295	1.293			1.26176
33.9306	1.29299			1.26125
34.0307	1.29376			1.26174
34.1294	1.29426			1.26029
34.2297	1.2937			1.25982
34.3304	1.29571			1.26059
34.4306	1.28822			1.25228
34.5311	1.2883			1.25123
34.6292	1.28286			1.24649
34.7305	1.28093			1.24451
34.8303	1.27682			1.23986
34.9303	1.27173			1.23545
35.03	1.26903	0.075915	51	1.23324	0.067625	51
35.1294	1.26512			1.23017
35.2304	1.2612			1.22677
35.3304	1.2593			1.22449
35.429	1.25712			1.22425
35.5302	1.25291			1.22022
35.6299	1.25268			1.22139
35.7293	1.25162			1.22141
35.8309	1.24914			1.22007
35.9296	1.24632			1.21839
36.0307	1.24237			1.21602
36.1293	1.24647			1.2197
36.2308	1.24632			1.22012
36.3301	1.23978			1.21434
36.4301	1.24418			1.2193
36.5293	1.24399			1.22106
36.6306	1.24375			1.22135
36.7296	1.24444			1.22232
36.8289	1.24673			1.22511
36.9298	1.24592			1.22329
37.029	1.24776			1.22628
37.1312	1.25046			1.22931
37.2292	1.25008			1.22887
37.3308	1.25222			1.23003
37.4297	1.25179			1.23033
37.5291	1.25682	0.060066	51	1.23485	0.067706	51
37.6311	1.25935			1.24006
37.7289	1.26394			1.23865
37.8306	1.26231			1.23629
37.9308	1.26581			1.24008
38.0301	1.27143			1.24557
38.1294	1.27309			1.24565
38.2309	1.27616			1.24942
38.3295	1.27763			1.25046
38.4308	1.28538			1.25822
38.5297	1.28536			1.25832
38.6307	1.2864			1.25819
38.7298	1.29032			1.26215
38.8291	1.29306			1.26483
38.9308	1.29999			1.26997
39.0307	1.3001			1.26874
39.1287	1.30377			1.2722
39.2293	1.30724			1.27617
39.3308	1.31147			1.27961
39.4305	1.31431			1.28173
39.5311	1.31719			1.28477
39.6306	1.31835			1.28517
39.7304	1.32032			1.28694
39.8304	1.32393			1.29037
39.93	1.32695			1.29305
40.0312	1.32731	0.077397	51	1.29357	0.101913	51
40.1296	1.3302			1.29745
40.2306	1.33377			1.29914
40.3306	1.33725			1.30287
40.4299	1.3384			1.30369
40.5297	1.34468			1.30976
40.6305	1.34794			1.31281
40.7306	1.34801			1.31258
40.8309	1.34973			1.31418
40.9311	1.35226			1.31651
41.0307	1.35732			1.32134
41.1311	1.36045			1.32308
41.2296	1.36248			1.32544
41.3305	1.36474			1.32807
41.4311	1.36759			1.33019
41.5292	1.36787			1.33068
41.6309	1.37197			1.33442
41.7296	1.3737			1.336
41.8306	1.37628			1.33959
41.9314	1.37723			1.33978
42.0299	1.37521			1.33804
42.1302	1.37885			1.34079
42.2313	1.38042			1.34238
42.329	1.38146			1.34252
42.4309	1.38107			1.34242
42.5966	1.38219	0.089318	51	1.34354	0.122023	51
42.6719	1.38597			1.34703
42.7443	1.38785			1.34929
42.835	1.38668			1.34766
42.9344	1.38775			1.34902
43.0327	1.39017			1.35174
43.137	1.39078			1.35248
43.2308	1.39139			1.3533
43.3287	1.3889			1.35076
43.4323	1.38912			1.3507
43.5323	1.38927			1.35121
43.6329	1.38744			1.34952
43.7319	1.38926			1.3513
43.8307	1.38641			1.34783
43.9304	1.39114			1.35234
44.0333	1.3905			1.35247
44.1334	1.39079			1.3524
44.2362	1.38985			1.35168
44.333	1.38887			1.3508
44.4312	1.39026			1.35231
44.5322	1.38679			1.34931
44.6328	1.38877			1.35141
44.7293	1.38748			1.35014
44.831	1.38754			1.34976
44.9292	1.38365			1.34611
45.0307	1.38379	0.092045	51	1.34653	0.123369	51
45.1299	1.38227			1.34502
45.2308	1.38406			1.34688
45.3293	1.38154			1.34435
45.429	1.38182			1.34457
45.5305	1.38155			1.34428
45.63	1.37903			1.3422
45.7308	1.38106			1.34352
45.8296	1.37837			1.34083
45.9311	1.37789			1.3406
46.0296	1.37592			1.33853
46.1312	1.37853			1.3412
46.23	1.37849			1.34056
46.3303	1.3785			1.3409
46.4294	1.3762			1.33899
46.5293	1.3765			1.33814
46.6297	1.37502			1.33755
46.731	1.37631			1.33826
46.8297	1.37554			1.33723
46.9308	1.37549			1.33758
47.0291	1.37221			1.33501
47.1314	1.37002			1.33202
47.2296	1.37127			1.33313
47.3303	1.37052			1.33252
47.4309	1.36999			1.33232
47.5294	1.36569	0.086639	51	1.32802	0.109466	51
47.6286	1.36742			1.32974
47.7312	1.36797			1.32992
47.8308	1.3663			1.32881
47.9288	1.36573			1.3281
48.0311	1.36289			1.32556
48.1314	1.36115			1.32369
48.2287	1.36387			1.32619
48.3296	1.36251			1.32507
48.4312	1.35944			1.32183
48.5289	1.35515			1.31734
48.6309	1.35316			1.31603
48.7296	1.35308			1.31596
48.8302	1.3562			1.31881
48.9298	1.35098			1.31421
49.0309	1.35249			1.31544
49.1296	1.34814			1.31148
49.2311	1.34696			1.30941
49.3297	1.34416			1.30566
49.4309	1.34526			1.30683
49.5293	1.34159			1.30375
49.6287	1.33981			1.30169
49.7315	1.33771			1.29975
49.8312	1.34011			1.30242
49.9297	1.33617			1.29843
50.033	1.33257	0.079091	51	1.29518	0.100218	51
50.131	1.33314			1.29574
50.2297	1.33477			1.29726
50.3314	1.3314			1.29513
50.4295	1.32773			1.29114
50.5318	1.33			1.29356
50.6312	1.32489			1.28989
50.7299	1.32531			1.29073
50.8312	1.32355			1.28873
50.9293	1.32219			1.28674
51.0311	1.32143			1.28675
51.1308	1.32136			1.28755
51.231	1.32102			1.28622
51.3309	1.32094			1.2863
51.4296	1.31867			1.28534
51.531	1.32017			1.28635
51.631	1.31787			1.28488
51.7302	1.31902			1.28568
51.8314	1.31773			1.28474
51.9297	1.31922			1.28655
52.0307	1.31971			1.28692
52.1297	1.31753			1.28491
52.2312	1.31605			1.28314
52.3311	1.3142			1.28191
52.4294	1.3175			1.28495
52.531	1.31447	0.076091	51	1.28282	0.097049	51
52.6296	1.31317			1.28166
52.731	1.3141			1.28279
52.8314	1.31003			1.27923
52.9311	1.31236			1.28058
53.0294	1.31303			1.28123
53.1312	1.30821			1.27631
53.2311	1.3109			1.27954
53.3295	1.31064			1.27942
53.4308	1.31083			1.2798
53.5296	1.31074			1.2792
53.6315	1.31077			1.27889
53.73	1.31098			1.2792
53.8311	1.31134			1.27913
53.9311	1.3121			1.28018
54.0291	1.31302			1.28086
54.1297	1.31281			1.28039
54.2311	1.31278			1.27995
54.331	1.31143			1.27872
54.4311	1.30865			1.27688
54.5299	1.3101			1.27746
54.6312	1.31123			1.27833
54.7298	1.31129			1.27882
54.831	1.30831			1.27674
54.9293	1.30719			1.2759
55.0309	1.30742	0.075904	51	1.27567	0.09658	51
