# Supplementary material for: β-cell deletion of the PKm1 and PKm2 isoforms of pyruvate kinase in mice reveals their essential role as nutrient sensors for the KATP channel
Source: eLife. 2022 Aug 23;11:e79422. doi: 10.7554/eLife.79422 (PMC9444242; doi:10.7554/eLife.79422)
Supplement: Figure 5—source data 1. [file elife-79422-fig5-data1.xlsx]

## Sheet: 5B
Power				Frequency				Open time
2.7G	AA	Pka		2.7G	AA	Pka		2.7G	AA	Pka
1	0.468947	1.21143		1	0.279279	1.15701		1	1.67913	1.04703
1	0.114965	0.502686		1	0.097778	0.4		1	1.17578	1.25671
1	0.047707	0.094845		1	0.119942	0.190667		1	0.397749	0.497438
1	0.128037	0.37833		1	0.254346	0.504829		1	0.503395	0.749422
1	0.549543	0.388103		1	0.661778	0.95417		1	0.830403	0.406744
1	0.003423	0.748624		1	0.041791	1.62687		1	0.081908	0.460163
1	0.129833	0.384261		1	0.198523	0.485226		1	0.653998	0.791922

## Sheet: 5C
Power				Frequency				Open time
2.7G	AA			2.7G	AA			2.7G	AA
1	0.809869			1	0.85568			1	0.946463
1	2.89937			1	2.94613			1	0.98413
1	0.760351			1	0.607443			1	1.25172
1	1.05938			1	1.19193			1	0.888796
1	0.503689			1	0.636943			1	0.790791
1	1.06549			1	1.05209			1	1.01273
1	1.0656			1	1.49794			1	0.711374

## Sheet: 5D
Power				Frequency				Open time
2.7G	AA			2.7G	AA			2.7G	AA
1	0.18042			1	0.244318			1	0.738464
1	0.015605			1	0.057502			1	0.271376
1	0.780138			1	0.724347			1	1.07702
1	0.144226			1	0.305085			1	0.47274
1	0.158957			1	0.430752			1	0.369021
1	0.025323			1	0.087591			1	0.289106
1	0.085455			1	0.352463			1	0.242451

## Sheet: 5E
Power				Frequency				Open time
2.7G	AA			2.7G	AA			2.7G	AA
1	0.902147			1	1.03604			1	0.870768
1	1.2668			1	0.945679			1	1.33957
1	0.116276			1	0.175341			1	0.663144
1	1.48672			1	1.42147			1	1.04591
1	0.184679			1	0.368421			1	0.501271
1	0.881497			1	1.17621			1	0.749438

## Sheet: 5F
Power				Frequency				Open time
2.7G	AA	Pka		2.7G	AA	Pka		2.7G	AA	Pka
1	1.64231	0.301699		1	1.42857	0.281746		1	1.14962	1.07082
1	0.41844	0.098455		1	0.464096	0.178191		1	0.901624	0.552523
1	1.24542	0.481186		1	1.18667	0.646459		1	1.0495	0.744342
1	0.53092	0.022669		1	0.739258	0.15625		1	0.718179	0.145084
1	1.22739	0.905826		1	1.05	1.15		1	1.16894	0.787674
1	0.846911	0.127674		1	0.724426	0.179889		1	1.16908	0.709741
1	0.183074	0.27815		1	0.206178	0.352896		1	0.887945	0.788193

## Sheet: 5H
Average Traces									AUC
	Con			Con +PKa					contol	+PKa
Time [m]	average	stdev	n	average	stdev	n			0.8865	0.1406
0.004933	0.956641	0.014976	101	0.95889	0.012987	99			0.8302	0.5176
0.109033	0.955097			0.958474					0.8858	0.6711
0.207567	0.957818			0.958441					1.151	0.6918
0.308767	0.959583			0.959532					0.301	0.6216
0.405	0.960142			0.961183					0.7238	0.6426
0.507583	0.960461			0.962901					0.4514	0.7725
0.60735	0.961746			0.963423					0.6948	0.6181
0.7074	0.963268			0.963623					0.5878	0.628
0.806567	0.964196			0.964739					0.9163	0.5062
0.906533	0.96488			0.96527					1.629	0.9406
1.00628	0.966218			0.966033					0.4859	0.2219
1.10838	0.967086			0.966974					0.3129	0.1544
1.20512	0.967978			0.967346					0.809	0.5348
1.30638	0.968938			0.96858					0.3625	0.687
1.40647	0.969191			0.969156					0.7015	0.8558
1.5063	0.969828			0.969677					0.5635	0.782
1.60647	0.970555			0.970147					0.2333	1.005
1.70627	0.970964			0.970883					0.4021	0.6297
1.80668	0.971858			0.971558					0.5838	0.8297
1.90633	0.972224			0.97208					0.4232	0.7693
2.00642	0.972634			0.972754					0.8659	0.6486
2.10632	0.972891			0.97271					0.5782	1.019
2.2065	0.973283			0.973638					0.4891	0.8631
2.30637	0.973612			0.973894					0.548	0.7506
2.40678	0.974204			0.974469					0.4102	1.023
2.50653	0.974451	0.010101	101	0.974801	0.008507	99			0.7346	0.6222
2.60633	0.974754			0.975117					0.3028	0.7661
2.70843	0.975172			0.975286					0.1735	0.6598
2.80622	0.975711			0.976102					0.2193	0.9044
2.90722	0.975939			0.976323					0.5162	0.7222
3.00512	0.976384			0.976732					0.4783	0.9845
3.10525	0.976645			0.976937					0.3409	0.9884
3.20473	0.97714			0.977173					0.3324	0.9638
3.3051	0.977369			0.977381					0.343	1.195
3.40638	0.977808			0.978069					0.3424	0.9931
3.50663	0.978251			0.978498					0.3261	0.8122
3.60643	0.97855			0.978439					0.6968	1.004
3.70638	0.978886			0.979115					0.6602	1.129
3.80735	0.979219			0.97926					0.5797	0.7752
3.90668	0.97963			0.97884					0.4204	1.031
4.00638	0.979803			0.979224					0.3734	0.764
4.10643	0.980253			0.979731					0.8145	0.4305
4.20638	0.980512			0.98004					1.094	0.6877
4.30743	0.980812			0.980155					1.076	0.8501
4.40515	0.981219			0.980371					1.237	0.7991
4.50757	0.981446			0.980676					0.6632	0.7415
4.60682	0.981668			0.980733					0.8572	0.8533
4.7067	0.981966			0.981003					0.7465	1.026
4.8065	0.982229			0.980893					0.7652	0.8642
4.90673	0.982474			0.981344					0.9379	1.09
5.00647	0.982648	0.006768	101	0.981708	0.006701	99			0.5379	0.7504
5.10662	0.982914			0.981691					0.9585	1.194
5.20642	0.98322			0.98213					0.8523	1.229
5.3051	0.983252			0.982193					0.8658	0.7757
5.40512	0.983609			0.982531					0.7468	1.301
5.50668	0.983989			0.982685					0.6498	1.358
5.6066	0.983933			0.982519					0.7711	0.9767
5.70652	0.984428			0.982938					0.6897	0.8862
5.8065	0.98439			0.982945					0.7385	0.7665
5.90617	0.984572			0.983317					0.5406	0.6915
6.00685	0.984765			0.98335					0.8819	0.6473
6.10638	0.985118			0.983557					0.7441	0.4707
6.20632	0.985008			0.983824					0.7814	0.5175
6.30658	0.985382			0.983866					0.6805	0.9138
6.40643	0.98539			0.984176					0.6515	0.768
6.50637	0.985864			0.984373					0.6027	0.5198
6.60653	0.985924			0.984362					0.8551	1.357
6.70657	0.985921			0.984714					0.9662	0.6625
6.80642	0.986132			0.984792					0.8789	0.8929
6.90663	0.986253			0.984893					0.7206	0.8827
7.0072	0.986444			0.985014					1.143	1.007
7.1051	0.986493			0.98505					1.1	0.954
7.20513	0.986943			0.985273					1.053	1.148
7.30645	0.98705			0.985376					0.9815	0.5126
7.40672	0.987052			0.98532					0.9466	1.094
7.50675	0.987286	0.005573	101	0.985465	0.006257	99			0.7771	1.144
7.60663	0.987378			0.985635					0.5064	0.7773
7.7065	0.987593			0.985706					0.3284	1.114
7.8064	0.987699			0.985767					0.4608	0.6189
7.90642	0.987616			0.986117					0.1965	0.7259
8.00642	0.987782			0.986319					0.51	0.8731
8.10645	0.987875			0.986339					0.6413	1.143
8.20668	0.988144			0.986478					0.3115	1.112
8.30633	0.988028			0.986658					0.6568	0.735
8.40633	0.98833			0.986972					0.5712	0.9067
8.50677	0.988297			0.987289					0.7385	0.8325
8.60518	0.988467			0.987252					0.6526	0.8739
8.70668	0.98861			0.987294					0.5557	0.8963
8.80648	0.988784			0.987715					0.6402	1.115
8.90657	0.988759			0.987972					0.5621	1.019
9.00685	0.988876			0.988097					0.5292	0.9312
9.10685	0.989075			0.988222					0.3854	1.418
9.20642	0.988991			0.98836					0.6072	1.299
9.30705	0.989373			0.988385					0.6159	1.11
9.40668	0.989472			0.988622					0.749	0.7992
9.50685	0.989636			0.988918					0.7432	1.209
9.60662	0.989665			0.988916					0.8638	1.18
9.70653	0.989857			0.989404					0.6248	1.506
9.80655	0.989743			0.989407					0.6386
9.90648	0.989881			0.989568					0.6103
10.0069	0.989847	0.004656	101	0.99005	0.004372	99
10.1062	0.990004			0.990062
10.2063	0.989978			0.990211
10.3048	0.990126			0.990136
10.4073	0.990431			0.990228
10.5049	0.990485			0.990655
10.6083	0.99024			0.990611
10.7064	0.990492			0.990747
10.8064	0.990506			0.990865
10.9066	0.991036			0.990693
11.0052	0.990759			0.990867
11.1075	0.990923			0.990855
11.2053	0.991036			0.990975
11.3072	0.990935			0.991059
11.4064	0.991037			0.991343
11.5066	0.991317			0.99127
11.6065	0.991227			0.991557
11.7065	0.991391			0.991463
11.8065	0.991537			0.991639
11.9069	0.991535			0.991359
12.0067	0.991464			0.991311
12.1053	0.991586			0.991663
12.2065	0.991735			0.991724
12.3053	0.991739			0.991584
12.4064	0.992038			0.991681
12.5052	0.991876	0.004016	101	0.991872	0.003563	99
12.6065	0.992072			0.991564
12.7065	0.992077			0.991971
12.8065	0.992136			0.991994
12.9068	0.99208			0.991967
13.0064	0.992319			0.991883
13.1063	0.992368			0.99227
13.2075	0.992536			0.992085
13.3048	0.99244			0.992414
13.405	0.992457			0.992218
13.5052	0.992597			0.992406
13.6075	0.992647			0.992287
13.7073	0.9927			0.992621
13.8049	0.992697			0.992343
13.9062	0.992942			0.992455
14.0051	0.992824			0.992559
14.1065	0.992998			0.992662
14.2067	0.993091			0.992766
14.3067	0.993002			0.99264
14.4066	0.993093			0.992887
14.5066	0.992915			0.992972
14.6069	0.993306			0.992765
14.7066	0.993199			0.992926
14.8065	0.993318			0.993009
14.9067	0.993504			0.992877
15.0066	0.993486	0.003441	101	0.992895	0.002998	99
15.1066	0.993597			0.992968
15.207	0.993564			0.993127
15.3066	0.993444			0.992769
15.4065	0.993598			0.993304
15.5065	0.993684			0.993379
15.6062	0.99366			0.993581
15.7051	0.993826			0.993729
15.8047	0.993847			0.993726
15.9049	0.994067			0.993739
16.005	0.994015			0.993935
16.1049	0.9939			0.994327
16.2068	0.993868			0.99439
16.3065	0.993993			0.994466
16.4078	0.994175			0.994593
16.5077	0.994329			0.994887
16.6075	0.994226			0.994892
16.7065	0.994381			0.9951
16.8066	0.994487			0.995268
16.9067	0.994448			0.995288
17.0068	0.994499			0.995397
17.1064	0.994774			0.995406
17.2068	0.994652			0.99547
17.3066	0.994401			0.995539
17.4066	0.994567			0.995424
17.5066	0.994502	0.003379	101	0.995417	0.002665	99
17.6048	0.994626			0.995587
17.7051	0.994666			0.995753
17.8063	0.99485			0.996003
17.9067	0.995039			0.995736
18.0062	0.994866			0.99566
18.1049	0.994632			0.995786
18.2064	0.994804			0.995977
18.3065	0.994923			0.995742
18.4064	0.995039			0.995868
18.5063	0.995113			0.99608
18.6069	0.995185			0.996074
18.7066	0.995149			0.996008
18.8066	0.995112			0.995881
18.905	0.995374			0.996015
19.0067	0.995233			0.996247
19.1063	0.995493			0.996278
19.2068	0.995323			0.996068
19.3064	0.99541			0.996258
19.4066	0.995588			0.996029
19.506	0.995533			0.996119
19.6053	0.995574			0.995872
19.7065	0.995576			0.996272
19.805	0.995481			0.996208
19.9077	0.995633			0.99643
20.0053	0.996053	0.002934	101	0.996161	0.002197	99
20.1064	0.996165			0.996266
20.2064	0.996273			0.996194
20.3063	0.996056			0.99638
20.4073	0.996042			0.996242
20.5068	0.99632			0.996123
20.607	0.996245			0.996248
20.7066	0.996323			0.99605
20.8063	0.996121			0.996015
20.9065	0.996344			0.996239
21.0066	0.996354			0.996839
21.1066	0.996643			0.996645
21.2067	0.99648			0.996806
21.3065	0.996666			0.996809
21.4067	0.996804			0.996804
21.5063	0.996981			0.996867
21.6074	0.996916			0.996671
21.7066	0.996976			0.996735
21.8072	0.997179			0.996777
21.9066	0.997177			0.99661
22.0065	0.997127			0.996869
22.1064	0.997178			0.996756
22.2066	0.99739			0.996672
22.3067	0.997348			0.996996
22.4066	0.997427			0.997053
22.5076	0.997267	0.001495	101	0.997009	0.002075	99
22.6078	0.997453			0.997191
22.7051	0.997516			0.997371
22.8068	0.997369			0.997348
22.9066	0.997438			0.99753
23.0051	0.997583			0.997714
23.1069	0.997544			0.997394
23.2064	0.997228			0.997712
23.305	0.997755			0.997555
23.406	0.99773			0.99754
23.5049	0.99774			0.997575
23.6071	0.997812			0.997855
23.7065	0.997726			0.998067
23.8073	0.997839			0.997823
23.905	0.997959			0.997805
24.0077	0.997956			0.997872
24.1053	0.997951			0.997853
24.2048	0.997976			0.998036
24.3066	0.997969			0.997949
24.4064	0.997953			0.997888
24.5051	0.99819			0.998052
24.6067	0.998215			0.997908
24.7066	0.998042			0.998153
24.8066	0.998738			0.998402
24.9067	0.998353			0.998119
25.0069	0.998556	0.001168	101	0.99827	0.001273	99
25.1064	0.998436			0.998372
25.2063	0.998294			0.998567
25.3075	0.998499			0.998417
25.4066	0.998412			0.998418
25.5066	0.998623			0.998484
25.6065	0.998611			0.998646
25.7065	0.998696			0.99845
25.8063	0.998653			0.998485
25.9075	0.999003			0.998559
26.0065	0.998802			0.998627
26.1067	0.998782			0.998654
26.2068	0.999188			0.998752
26.3068	0.999175			0.99904
26.4066	0.999169			0.999025
26.5068	0.999109			0.999122
26.6068	0.999221			0.998952
26.7066	0.999382			0.999185
26.8066	0.999204			0.998907
26.9068	0.999409			0.999078
27.0063	0.999393			0.998868
27.1066	0.999508			0.999231
27.2066	0.999366			0.999148
27.3068	0.999369			0.999106
27.4064	0.999406			0.999194
27.505	0.999458	0.000795	101	0.999123	0.0007	99
27.6051	0.999527			0.999435
27.7066	0.999743			0.999335
27.8066	0.99968			0.999613
27.9066	0.999675			0.999442
28.0068	0.999802			0.999435
28.1064	0.999778			0.999592
28.2063	0.999787			0.999675
28.3078	0.999824			0.999765
28.4051	0.999735			0.999732
28.5072	0.999873			0.999789
28.6066	0.999773			0.999727
28.7066	0.9998			1.00013
28.8068	0.999996			0.999776
28.9078	0.999951			1.00026
29.0051	0.999861			0.999868
29.1065	1.00019			1.00033
29.2064	1.0001			1.00025
29.3067	0.99995			0.999863
29.4069	1.00009			1.00038
29.5067	1.00016			1.00014
29.6068	1.00026			1.00003
29.7067	1.00045			1.00052
29.8069	1.00028			1.00027
29.9065	1.00036			1.00048
30.0067	1.00048	0.000725	101	1.00063	0.000734	99
30.1066	1.00048			1.00045
30.2066	1.0004			1.00058
30.3064	1.00073			1.0004
30.4074	1.00078			1.00026
30.5069	1.00089			1.00091
30.6064	1.00078			1.00092
30.7071	1.0009			1.00078
30.8069	1.00144			1.00099
30.9052	1.00144			1.00063
31.0066	1.00174			1.00093
31.1065	1.00131			1.00056
31.2066	1.00149			1.00019
31.3067	1.0015			1.00011
31.4066	1.00078			0.9999
31.5051	1.00047			0.999799
31.6075	1.00009			0.99913
31.7076	0.999279			0.998668
31.8078	0.99899			0.998091
31.9052	0.998249			0.996846
32.0053	0.997606			0.996121
32.1075	0.997008			0.995569
32.2074	0.996468			0.994695
32.308	0.995445			0.994168
32.4084	0.995073			0.993598
32.5064	0.994267	0.006403	101	0.992935	0.005288	99
32.6065	0.993837			0.992636
32.7066	0.993416			0.992306
32.8066	0.992826			0.99235
32.9066	0.992128			0.992899
33.0067	0.992017			0.993598
33.1068	0.991785			0.99385
33.2071	0.991598			0.994507
33.3067	0.99135			0.995452
33.4069	0.991266			0.996456
33.5067	0.991301			0.997492
33.6068	0.991245			0.998559
33.7064	0.991301			0.999395
33.8071	0.991445			1.00044
33.9066	0.992061			1.00113
34.0065	0.992364			1.00216
34.1064	0.992622			1.00289
34.2069	0.993547			1.00402
34.3067	0.994451			1.00536
34.4065	0.995079			1.00667
34.5066	0.996002			1.0084
34.6066	0.997232			1.01013
34.7068	0.998777			1.01124
34.8064	1.00011			1.01341
34.9065	1.00122			1.0153
35.0067	1.00313	0.017621	101	1.01739	0.037808	99
35.1065	1.0048			1.01968
35.2052	1.0064			1.02233
35.3066	1.00856			1.02451
35.4066	1.01064			1.02699
35.5063	1.01288			1.02944
35.6068	1.01485			1.03225
35.7066	1.01742			1.03453
35.807	1.01987			1.03691
35.9068	1.02247			1.03912
36.005	1.02479			1.04157
36.1078	1.02709			1.04304
36.205	1.02918			1.04533
36.3066	1.03117			1.04728
36.4066	1.03292			1.04918
36.5066	1.03504			1.05084
36.6068	1.03724			1.0523
36.707	1.03915			1.05398
36.8049	1.04096			1.05531
36.9054	1.04243			1.05693
37.0069	1.0441			1.05836
37.1066	1.04558			1.05994
37.2064	1.0475			1.06177
37.3063	1.04884			1.06305
37.408	1.05009			1.06432
37.5067	1.05143	0.034366	101	1.06504	0.032915	99
37.6066	1.05255			1.06621
37.7069	1.0539			1.06712
37.8071	1.05466			1.06796
37.9067	1.05553			1.06842
38.0066	1.05659			1.0693
38.1069	1.05723			1.06987
38.2066	1.05805			1.0708
38.3067	1.05859			1.07135
38.4066	1.05964			1.07164
38.5068	1.06012			1.07247
38.6068	1.06045			1.07318
38.707	1.06066			1.07374
38.8065	1.06134			1.07398
38.9081	1.0618			1.07454
39.0067	1.0622			1.07488
39.1067	1.06218			1.07517
39.2066	1.06231			1.07547
39.3067	1.06265			1.07578
39.4066	1.0626			1.07562
39.5067	1.0627			1.07563
39.6064	1.06274			1.07574
39.7067	1.06268			1.07605
39.8085	1.06276			1.07604
39.9067	1.0625			1.07587
40.0048	1.06229	0.029385	101	1.07605	0.025059	99
40.1066	1.06209			1.0758
40.2064	1.06162			1.07564
40.3066	1.06138			1.0752
40.4065	1.06125			1.07497
40.5067	1.0611			1.07482
40.6067	1.06078			1.0742
40.7067	1.06009			1.07363
40.807	1.06015			1.07318
40.9068	1.05969			1.07324
41.0067	1.05961			1.07272
41.1069	1.05943			1.07252
41.2069	1.05906			1.07163
41.3078	1.05853			1.07126
41.4068	1.05826			1.07049
41.5065	1.05791			1.07001
41.6069	1.05739			1.06928
41.7066	1.05683			1.06865
41.8066	1.05642			1.06768
41.9067	1.05593			1.06769
42.005	1.05518			1.06662
42.1068	1.05495			1.06592
42.2067	1.05452			1.06532
42.3067	1.05399			1.06495
42.4066	1.05344			1.06438
42.507	1.05308	0.026489	101	1.06378	0.024823	99
42.607	1.05249			1.06292
42.7071	1.05176			1.06232
42.807	1.05109			1.06143
42.9068	1.05072			1.06092
43.0067	1.04992			1.06035
43.1069	1.04906			1.05943
43.2067	1.04822			1.05889
43.3067	1.04784			1.05803
43.4067	1.04737			1.05753
43.5067	1.047			1.05702
43.6067	1.04624			1.05599
43.7064	1.04524			1.05544
43.8078	1.04465			1.05483
43.9051	1.04403			1.05416
44.0085	1.04335			1.05325
44.1068	1.04276			1.05281
44.2073	1.04225			1.05212
44.3051	1.04142			1.05143
44.4066	1.04087			1.0508
44.5068	1.04028			1.0502
44.6067	1.03974			1.04954
44.7066	1.0393			1.04886
44.8072	1.03855			1.04853
44.9066	1.03789			1.04819
45.0066	1.0374	0.018355	101	1.04757	0.020846	99
45.1067	1.03692			1.04727
45.2071	1.03645			1.04648
45.3068	1.03602			1.0461
45.4068	1.0355			1.0455
45.5067	1.03505			1.04474
45.6066	1.03416			1.04444
45.7071	1.03376			1.04407
45.8071	1.03346			1.04341
45.9068	1.03319			1.04324
46.0071	1.03277			1.04246
46.1069	1.03222			1.04215
46.2072	1.03187			1.0417
46.3069	1.03142			1.04202
46.4068	1.03099			1.04155
46.5066	1.03079			1.04102
46.6078	1.03048			1.0407
46.7075	1.03015			1.04025
46.8047	1.02974			1.04018
46.9059	1.02945			1.03978
47.0052	1.02907			1.03974
47.1069	1.0284			1.03943
47.207	1.02833			1.03913
47.3067	1.02801			1.03861
47.4068	1.02782			1.03856
47.5068	1.02766	0.012683	101	1.03857	0.018881	99
47.6071	1.02708			1.03852
47.7067	1.02668			1.0382
47.807	1.02679			1.03803
47.9067	1.02632			1.03793
48.0066	1.02631			1.03769
48.1069	1.02586			1.03771
48.2067	1.02585			1.03748
48.3066	1.02543			1.03732
48.407	1.02504			1.03748
48.5067	1.02486			1.03732
48.6069	1.02472			1.03733
48.7064	1.02469			1.03708
48.8066	1.02466			1.03695
48.9078	1.02422			1.03696
49.0048	1.02414			1.03695
49.1048	1.02404			1.03668
49.2075	1.02405			1.03684
49.308	1.02391			1.03621
49.4079	1.0238			1.0366
49.507	1.02346			1.03641
49.6066	1.02356			1.03618
49.7068	1.02338			1.03623
49.8066	1.0231			1.03625
49.9068	1.023			1.03619
50.0069	1.023	0.010026	101	1.03637	0.021858	99
50.1067	1.02307			1.03629
50.2067	1.02304			1.03636
50.3066	1.02294			1.03598
50.4066	1.02299			1.03607
50.5069	1.02271			1.03615
50.6069	1.02238			1.03638
50.7069	1.02251			1.03631
50.8068	1.02274			1.03656
50.9051	1.02256			1.03633
51.0069	1.02255			1.03611
51.1068	1.02249			1.03625
51.2067	1.02233			1.03642
51.3068	1.02227			1.03638
51.4084	1.02207			1.03627
51.507	1.02202			1.03645
51.6065	1.02202			1.03653
51.7073	1.02211			1.03657
51.806	1.02186			1.03607
51.9052	1.02202			1.03637
52.0067	1.02222			1.03625
52.1069	1.02218			1.036
52.2069	1.02191			1.03626
52.3069	1.02187			1.03614
52.4069	1.02194			1.03622
52.5067	1.02202	0.009438	101	1.036	0.02338	99
52.6049	1.0222			1.03596
52.7065	1.02213			1.03627
52.8051	1.0221			1.03609
52.9069	1.02172			1.03632
53.0071	1.02161			1.03624
53.107	1.02194			1.03606
53.2067	1.02196			1.03614
53.3066	1.02207			1.03623
53.4069	1.02216			1.03614
53.5069	1.02205			1.0361
53.607	1.02212			1.03591
53.7067	1.02214			1.03585
53.8049	1.02214			1.03609
53.9054	1.02193			1.03582
54.0067	1.02201			1.03609
54.1069	1.02206			1.03643
54.2067	1.02223			1.03612
54.3078	1.0221			1.03597
54.4081	1.02199			1.03631
54.5078	1.02212			1.03656
54.6047	1.02234			1.03666
54.707	1.02211			1.03665
54.8069	1.02199			1.03692
54.907	1.02189			1.03663
55.0077	1.02222	0.009305	101	1.03702	0.02363	99
55.1082	1.02232			1.0372
55.2067	1.02224			1.03688
55.3072	1.02238			1.03724
55.4068	1.02239			1.0374
55.5067	1.02247			1.03754
55.6066	1.02253			1.03741
55.7067	1.02269			1.03736
55.8065	1.02294			1.0372
55.9072	1.02323			1.03674
56.0074	1.02355			1.03724
56.1067	1.02338			1.03703
56.2066	1.02328			1.03723
56.3066	1.02352			1.03727
56.4082	1.02398			1.03736
56.5078	1.02417			1.03759
56.6073	1.0239			1.03754
56.7078	1.0239			1.03739
56.8081	1.0235			1.03758
56.908	1.01993			1.0371
57.0066	1.02019			1.03705
57.106	1.02206			1.03038
57.205	1.02206			1.03029
57.3077	1.02222			1.03059
57.4051	1.02214			1.03065

## Sheet: 5I
Average Traces								AUC
	Con			Con +PKa				contol	+PKa
Time [m]	average	stdev	n	average	stdev	n		0.3697	0.1447
0.00055	1.05752	0.0232	83	1.06118	0.023533	108		0.2336	0.2819
0.107533	1.04976			1.05392				0.4167	0.2859
0.20855	1.04719			1.0511				0.4282	0.3429
0.308233	1.0456			1.0491				0.4124	0.2265
0.407533	1.04419			1.04752				0.6144	0.1368
0.510433	1.04343			1.04634				0.5005	0.2908
0.609767	1.04307			1.04534				0.346	0.3136
0.708583	1.04267			1.04459				1.174	0.1622
0.809417	1.04213			1.04366				0.8411	0.3647
0.909433	1.04089			1.04321				0.4436	0.3658
1.00858	1.04075			1.04202				0.8101	0.464
1.10818	1.03951			1.04171				0.5542	0.3164
1.20827	1.03851			1.04065				0.7659	0.2645
1.3082	1.03753			1.04008				0.7292	0.4088
1.40847	1.03704			1.03939				0.7136	0.3936
1.50757	1.03641			1.0387				0.2908	0.3801
1.60938	1.03606			1.03792				0.2165	0.4628
1.70995	1.03537			1.03745				0.1824	0.3319
1.8081	1.03492			1.03733				0.2786	0.2208
1.9086	1.03484			1.03689				0.2052	0.3475
2.00852	1.03483			1.03652				0.1629	0.2763
2.10997	1.03431			1.03658				0.2106	0.5358
2.20873	1.03384			1.03618				0.224	0.3911
2.30908	1.03378			1.03668				0.2132	0.2868
2.40847	1.0334			1.0363				0.147	0.2232
2.50853	1.03324	0.018836	83	1.03571	0.013184	108		0.248	0.3121
2.60908	1.03303			1.03513				0.2028	0.3712
2.70863	1.03291			1.03522				0.2327	0.1946
2.80885	1.03272			1.03514				0.2826	0.2314
2.90887	1.03255			1.03494				0.1889	0.2423
3.00893	1.03282			1.03479				0.2227	0.1761
3.10902	1.03282			1.0349				0.2017	0.1773
3.2085	1.03221			1.0352				0.2476	0.1967
3.30932	1.03239			1.03497				0.1728	0.1893
3.40877	1.03223			1.03469				0.1881	0.1697
3.50903	1.03183			1.03469				0.1681	0.2083
3.60918	1.03187			1.03441				0.1299	0.1921
3.70908	1.03188			1.03458				0.1587	0.2857
3.80903	1.03174			1.0347				0.3821	0.2298
3.90762	1.03154			1.03453				0.3848	0.2101
4.00982	1.03129			1.03452				0.4507	0.1896
4.10777	1.03113			1.03431				0.4084	0.2817
4.20943	1.03103			1.03442				0.4192	0.1793
4.30783	1.03099			1.03426				0.3539	0.1743
4.40897	1.03086			1.03374				0.4689	0.2386
4.50893	1.03072			1.0337				0.5	0.1852
4.6093	1.03031			1.0332				0.4327	0.1917
4.70938	1.03015			1.03292				0.5217	0.11
4.80932	1.03002			1.03269				0.4219	0.2289
4.90753	1.0298			1.03268				0.3117	0.2946
5.00913	1.02969	0.017914	83	1.0328	0.012019	108		0.3967	0.1538
5.10962	1.02954			1.03274				0.6043	0.2936
5.20915	1.02932			1.03237				0.2591	0.2788
5.30923	1.02903			1.03225				0.3361	0.294
5.40992	1.02916			1.03195				0.2989	0.3924
5.50923	1.02894			1.03193				0.3656	0.2165
5.60923	1.02843			1.0316				0.3963	0.3221
5.70737	1.02858			1.03144				0.405	0.3266
5.80757	1.02825			1.03126				0.479	0.2636
5.9092	1.02813			1.03104				0.2467	0.3405
6.00878	1.02772			1.03087				0.3421	0.3464
6.10882	1.02768			1.03057				0.5044	0.3636
6.20743	1.0277			1.03058				0.3574	0.3306
6.30878	1.02733			1.03024				0.2785	0.07752
6.40907	1.02741			1.02998				0.1685	0.1939
6.51082	1.0273			1.02995				0.2044	0.29
6.60747	1.02706			1.02957				0.1716	0.2065
6.70905	1.02673			1.02972				0.3906	0.1853
6.80958	1.02664			1.02914				0.3019	0.2447
6.90762	1.02656			1.02888				0.03173	0.2913
7.0091	1.02631			1.02905				0.2753	0.2897
7.11003	1.02621			1.02869				0.2986	0.2876
7.2092	1.02587			1.02874				0.3019	0.1849
7.30973	1.02591			1.02836				0.2285	0.1762
7.4106	1.02564			1.02816				0.3955	0.2073
7.50997	1.02543	0.017312	83	1.02791	0.010316	108		0.219	0.2618
7.6084	1.02522			1.02768				0.1945	0.2405
7.70762	1.02505			1.02752				0.318	0.2568
7.80773	1.02513			1.02714				0.2502	0.3236
7.90947	1.02474			1.02734				0.1762	0.2298
8.00775	1.02464			1.02688				0.3043	0.2317
8.10763	1.02422			1.02678				0.2127	0.2512
8.20883	1.02414			1.02651				0.2226	0.2791
8.30775	1.02391			1.02635				0.2499	0.2246
8.4082	1.02343			1.02602				0.3228	0.1088
8.50825	1.02346			1.02593				0.2517	0.1756
8.60817	1.02332			1.02568				0.3174	0.239
8.70897	1.02311			1.02554				0.2185	0.2921
8.80813	1.02262			1.02537				0.2806	0.2609
8.90813	1.0227			1.02493				0.3168	0.5269
9.00897	1.02262			1.02491					0.5157
9.10907	1.0225			1.02445					0.322
9.20808	1.02226			1.02428					0.5254
9.3077	1.02231			1.02411					0.6095
9.4094	1.02242			1.02405					0.4872
9.5092	1.02212			1.02366					0.184
9.60747	1.02167			1.02384					0.2152
9.70823	1.02136			1.0235					0.401
9.80933	1.02162			1.02338					0.2747
9.90722	1.021			1.0231					0.326
10.0082	1.02148	0.016184	91	1.0228	0.00942	108			0.265
10.1078	1.02068			1.02273					0.3837
10.2099	1.02042			1.02244					0.1885
10.3098	1.02021			1.0223					0.2669
10.4079	1.01988			1.02219					0.3978
10.5091	1.01979			1.02211					0.4979
10.6083	1.01967			1.0219					0.1693
10.708	1.01944			1.0214
10.8086	1.01901			1.02149
10.9077	1.01926			1.02122
11.0077	1.01871			1.02123
11.1079	1.01863			1.02106
11.2076	1.01836			1.02099
11.3079	1.0183			1.02073
11.4084	1.01834			1.02057
11.5078	1.01809			1.02056
11.6084	1.01771			1.02038
11.7083	1.01756			1.02031
11.8083	1.01733			1.02015
11.908	1.01707			1.01971
12.0085	1.01684			1.01977
12.1082	1.01627			1.01925
12.2082	1.01617			1.01924
12.3088	1.01607			1.01932
12.409	1.0166			1.01891
12.5085	1.01662	0.011679	91	1.01866	0.008166	108
12.6086	1.01649			1.01872
12.7082	1.01658			1.01839
12.8072	1.01626			1.01807
12.9084	1.01619			1.01815
13.0085	1.01621			1.01797
13.1083	1.01619			1.0177
13.2084	1.01614			1.0175
13.3084	1.01659			1.01754
13.4084	1.01655			1.01745
13.5084	1.01639			1.0172
13.6088	1.01597			1.01704
13.7082	1.01612			1.0173
13.809	1.01622			1.01689
13.9086	1.01557			1.0165
14.0074	1.01556			1.01649
14.1084	1.01553			1.0164
14.2079	1.01541			1.01614
14.31	1.0153			1.01603
14.4101	1.01496			1.01574
14.5084	1.0149			1.01558
14.6087	1.01485			1.01528
14.7073	1.01466			1.01532
14.8088	1.01459			1.01521
14.909	1.0143			1.01502
15.0088	1.0142	0.00564	91	1.01478	0.006334	108
15.1082	1.01395			1.01509
15.2086	1.01377			1.01488
15.3085	1.01362			1.01474
15.4088	1.01347			1.0147
15.5088	1.01336			1.01449
15.6091	1.01324			1.01417
15.7088	1.01295			1.01426
15.81	1.01304			1.01431
15.909	1.01286			1.01409
16.0074	1.01271			1.01418
16.1079	1.01248			1.01403
16.2092	1.01255			1.0138
16.308	1.01224			1.01373
16.4093	1.01225			1.01333
16.509	1.01219			1.01312
16.6081	1.01203			1.01281
16.7077	1.01166			1.01282
16.8092	1.01193			1.01266
16.9079	1.01154			1.0122
17.0081	1.01193			1.0123
17.1079	1.01177			1.01201
17.2087	1.01178			1.01219
17.3085	1.01168			1.01212
17.4091	1.01156			1.01189
17.5075	1.01137	0.004791	91	1.01162	0.005323	108
17.6074	1.01136			1.01166
17.7081	1.0114			1.01147
17.8079	1.01142			1.01136
17.9079	1.01127			1.01128
18.0083	1.01089			1.01081
18.1079	1.01076			1.01076
18.2102	1.01057			1.01063
18.3085	1.01046			1.01067
18.4081	1.01026			1.01038
18.5085	1.01014			1.01034
18.608	1.00996			1.01017
18.708	1.00987			1.00987
18.8077	1.00956			1.00968
18.9086	1.00928			1.00961
19.0083	1.00907			1.00949
19.1085	1.00917			1.00933
19.2086	1.00901			1.00927
19.3084	1.00881			1.00947
19.4083	1.00889			1.00899
19.5083	1.00866			1.00879
19.6087	1.00831			1.00874
19.7084	1.00841			1.00912
19.8087	1.00846			1.00871
19.9083	1.00837			1.00833
20.0087	1.00828	0.003525	91	1.00848	0.004403	108
20.1087	1.00802			1.00803
20.2084	1.0079			1.00805
20.3085	1.00802			1.00781
20.409	1.00761			1.00765
20.5089	1.0076			1.0078
20.6088	1.00737			1.00763
20.7084	1.00756			1.00727
20.8084	1.00745			1.00744
20.9086	1.00758			1.00727
21.009	1.00749			1.00712
21.1089	1.00749			1.00711
21.209	1.00714			1.00702
21.3087	1.00726			1.00703
21.4086	1.00691			1.00652
21.5088	1.00692			1.00656
21.6087	1.00686			1.00618
21.7087	1.00673			1.00644
21.8087	1.00645			1.00626
21.9091	1.00621			1.00618
22.0086	1.00614			1.00603
22.1087	1.00602			1.00594
22.2093	1.00596			1.00613
22.309	1.00595			1.00591
22.4097	1.00568			1.00565
22.5091	1.0057	0.002562	91	1.00551	0.003231	108
22.6094	1.00541			1.00549
22.7091	1.00514			1.00531
22.8093	1.00531			1.00531
22.9093	1.00509			1.00522
23.0093	1.00508			1.005
23.1078	1.00487			1.0049
23.2092	1.00509			1.00474
23.3088	1.00504			1.00491
23.4091	1.00472			1.00473
23.5081	1.00477			1.00457
23.6091	1.0049			1.00458
23.7092	1.00482			1.00429
23.8087	1.00516			1.00406
23.9094	1.00486			1.00406
24.0093	1.00465			1.00382
24.1087	1.00454			1.00379
24.2072	1.00462			1.00386
24.3093	1.00432			1.00381
24.4092	1.00447			1.00381
24.5093	1.00426			1.00363
24.6091	1.00406			1.00333
24.7095	1.00386			1.00352
24.8098	1.00381			1.00319
24.9092	1.00363			1.00301
25.0079	1.00336	0.001925	91	1.003	0.002153	108
25.1081	1.00323			1.00284
25.208	1.00325			1.00279
25.3091	1.00322			1.00258
25.4096	1.003			1.0024
25.5079	1.00285			1.00243
25.6091	1.00272			1.0023
25.708	1.00272			1.00233
25.8083	1.0023			1.00243
25.9078	1.0023			1.00252
26.0089	1.0022			1.00239
26.1075	1.00219			1.00228
26.2078	1.00212			1.00213
26.3078	1.00215			1.00186
26.4082	1.00186			1.00141
26.5085	1.0019			1.00148
26.6085	1.00186			1.00148
26.707	1.00178			1.00135
26.8084	1.0017			1.00127
26.9098	1.00159			1.00127
27.0092	1.00119			1.00123
27.1093	1.00125			1.00103
27.2087	1.00148			1.001
27.3097	1.00126			1.0009
27.4083	1.00098			1.00125
27.5085	1.00117	0.000847	91	1.00103	0.001289	108
27.6076	1.00103			1.00086
27.7085	1.00109			1.00072
27.8083	1.00134			1.00084
27.9083	1.00121			1.00066
28.0095	1.00081			1.00055
28.109	1.00085			1.00076
28.2086	1.00064			1.00066
28.3085	1.00074			1.00041
28.4085	1.00076			1.00042
28.5097	1.00046			1.00051
28.609	1.00025			1.00046
28.7087	1.00005			1.00032
28.8087	1.00024			1.00022
28.9089	1.00016			1.00019
29.0094	1.00009			1.00009
29.1091	0.999839			0.999819
29.209	0.999566			0.999607
29.3091	0.999523			0.999497
29.4094	0.999432			0.999784
29.5099	0.999407			0.999589
29.6105	0.999112			0.999621
29.7094	0.999081			0.999294
29.8093	0.999195			0.999095
29.9076	0.999097			0.999105
30.0082	0.999006	0.000797	91	0.999113	0.001233	108
30.11	0.999128			0.99921
30.2077	0.998816			0.999156
30.3084	0.998763			0.999501
30.4078	0.998673			0.999566
30.5074	0.998796			0.999215
30.608	0.999026			0.999364
30.7103	0.998784			0.999194
30.8077	0.998811			0.999222
30.9092	0.998794			0.998718
31.0086	0.998737			0.998751
31.1092	0.9986			0.998599
31.2077	0.99866			0.998658
31.3074	0.998541			0.998624
31.4096	0.998337			0.998745
31.5084	0.998218			0.998806
31.6082	0.998252			0.998875
31.7079	0.998173			0.998887
31.8085	0.997967			0.99853
31.9105	0.997701			0.998788
32.0105	0.997657			0.99847
32.1081	0.997509			0.998228
32.2086	0.997578			0.997955
32.3075	0.997397			0.997921
32.41	0.997318			0.998067
32.5102	0.997683	0.003415	91	0.998044	0.004028	108
32.6105	0.997524			0.998163
32.71	0.997892			0.99841
32.8081	0.997917			0.998826
32.9078	0.998456			0.999452
33.0082	0.998773			1.00028
33.1077	0.999538			1.00053
33.2081	1.00022			1.00099
33.3098	1.00081			1.00121
33.4105	1.00189			1.00181
33.508	1.00242			1.00274
33.6078	1.00335			1.00327
33.7083	1.00446			1.0038
33.8078	1.00588			1.00441
33.9074	1.00712			1.00526
34.0096	1.00845			1.00586
34.1103	1.00978			1.00704
34.2103	1.01121			1.00788
34.3096	1.01262			1.00897
34.4079	1.01378			1.01002
34.5085	1.0151			1.01082
34.6094	1.0163			1.01191
34.7082	1.01751			1.01273
34.8085	1.01828			1.01388
34.9085	1.01936			1.01487
35.0084	1.02033	0.019341	91	1.01617	0.0177	108
35.1084	1.02123			1.01701
35.2084	1.02254			1.01792
35.3083	1.02327			1.01861
35.4084	1.0244			1.01954
35.5087	1.02549			1.02069
35.6085	1.02637			1.02126
35.7086	1.02762			1.02235
35.8082	1.02855			1.02293
35.9078	1.02952			1.02349
36.0076	1.03043			1.0244
36.1093	1.03147			1.02493
36.2095	1.03265			1.02551
36.3098	1.03343			1.02624
36.4099	1.03433			1.02674
36.5097	1.0349			1.02718
36.6082	1.03541			1.02741
36.7101	1.03612			1.02792
36.8086	1.03667			1.02812
36.908	1.03676			1.02884
37.0086	1.03742			1.02901
37.1104	1.03761			1.02914
37.2088	1.03794			1.02949
37.3078	1.03819			1.02988
37.41	1.03807			1.02993
37.5085	1.03822	0.018616	91	1.02999	0.009641	108
37.6087	1.03847			1.03004
37.7081	1.03815			1.03011
37.8103	1.038			1.03017
37.9103	1.03795			1.03017
38.0086	1.03795			1.03016
38.1084	1.03793			1.03003
38.2103	1.03773			1.03016
38.3086	1.03739			1.02993
38.4085	1.03728			1.02992
38.5108	1.03752			1.0296
38.6083	1.03744			1.02973
38.7087	1.03706			1.02946
38.8088	1.03666			1.02935
38.9085	1.03644			1.02949
39.0085	1.03611			1.02872
39.1081	1.03618			1.02899
39.2087	1.0358			1.02884
39.3084	1.03583			1.02923
39.4085	1.03553			1.02891
39.5084	1.03503			1.02831
39.6099	1.03487			1.02824
39.7083	1.03452			1.02845
39.8088	1.03432			1.02825
39.9094	1.034			1.02821
40.0092	1.03388	0.020217	91	1.02774	0.009742	108
40.1086	1.0336			1.02778
40.2088	1.03337			1.0274
40.3089	1.03286			1.02755
40.4092	1.03267			1.02729
40.5092	1.03226			1.02702
40.608	1.03198			1.02679
40.7085	1.03185			1.02672
40.8081	1.03132			1.02639
40.909	1.03117			1.02622
41.0078	1.03112			1.02552
41.1082	1.03061			1.02549
41.2081	1.03029			1.02534
41.3094	1.03002			1.02504
41.4082	1.02933			1.02481
41.5076	1.02927			1.02479
41.6096	1.02932			1.02451
41.7092	1.0289			1.02434
41.8083	1.02877			1.02402
41.9096	1.02849			1.02379
42.0097	1.02824			1.02351
42.1095	1.02782			1.02307
42.2081	1.02765			1.0229
42.3094	1.02742			1.02261
42.4098	1.02687			1.02248
42.5095	1.02664	0.020708	91	1.02231	0.010943	108
42.6101	1.02657			1.02218
42.7099	1.02622			1.02192
42.8085	1.02601			1.02177
42.9082	1.02542			1.02169
43.0084	1.02517			1.02147
43.1084	1.02512			1.02136
43.2085	1.02454			1.02105
43.3083	1.02428			1.02075
43.4083	1.02415			1.02079
43.5082	1.02414			1.02052
43.6084	1.02392			1.01995
43.7082	1.0236			1.01991
43.8092	1.02301			1.01985
43.9092	1.02279			1.01988
44.0082	1.02269			1.01931
44.1086	1.02225			1.01898
44.209	1.02192			1.019
44.3089	1.02188			1.01856
44.4073	1.02149			1.0187
44.5085	1.02152			1.01829
44.6086	1.02131			1.01799
44.7086	1.02119			1.0175
44.8088	1.0211			1.01774
44.9088	1.02077			1.0176
45.0091	1.02048	0.021662	91	1.01763	0.011597	108
45.1087	1.01976			1.0175
45.2083	1.01946			1.01743
45.3092	1.01907			1.01706
45.4091	1.01897			1.01735
45.5092	1.01878			1.01696
45.6087	1.01842			1.01687
45.7088	1.01833			1.0168
45.8088	1.01816			1.01619
45.9087	1.01788			1.01623
46.0087	1.01723			1.01593
46.1087	1.01719			1.01598
46.2091	1.01698			1.01554
46.3091	1.01668			1.01527
46.4087	1.01641			1.01521
46.5089	1.01624			1.01496
46.609	1.01595			1.0151
46.7091	1.01576			1.01502
46.8089	1.01549			1.01493
46.9094	1.01542			1.01474
47.0089	1.01526			1.01459
47.1095	1.0151			1.01438
47.209	1.01493			1.01388
47.309	1.01469			1.01384
47.4096	1.01438			1.01363
47.5086	1.01419	0.022964	91	1.0135	0.01183	108
47.6075	1.01374			1.01342
47.7097	1.01364			1.0133
47.8093	1.01344			1.01311
47.91	1.01306			1.01314
48.0083	1.0129			1.01272
48.1082	1.01294			1.01289
48.2096	1.0127			1.01273
48.3089	1.01268			1.0126
48.4087	1.01248			1.01272
48.5096	1.01239			1.01254
48.6098	1.01242			1.01228
48.7085	1.01217			1.01228
48.8086	1.01186			1.01204
48.9095	1.01183			1.01205
49.0089	1.01174			1.01182
49.1099	1.01175			1.0117
49.2103	1.01139			1.01155
49.3084	1.01133			1.01157
49.4096	1.01132			1.01131
49.51	1.01126			1.01127
49.6093	1.01118			1.01112
49.7084	1.01087			1.01121
49.8094	1.01101			1.01106
49.9099	1.01055			1.01094
50.0093	1.01026	0.023096	91	1.01092	0.01167	108
50.1085
50.21
50.3101
50.4103
50.5091
50.6095
50.7094
50.8103
50.9105
51.0112
