# Supplementary material for: β-cell deletion of the PKm1 and PKm2 isoforms of pyruvate kinase in mice reveals their essential role as nutrient sensors for the KATP channel
Source: eLife. 2022 Aug 23;11:e79422. doi: 10.7554/eLife.79422 (PMC9444242; doi:10.7554/eLife.79422)
Supplement: Figure 6—figure supplement 1—source data 1. [file elife-79422-fig6-figsupp1-data1.xlsx]

## Sheet: Sheet1
mins	Con			PKM2 KO			Con +PKa			PKM2 KO +PKa
	Mean	SD	N	Mean	SD	N	Mean	SD	N	Mean	SD	N
0.004933	0.962875	0.01046	58	0.961976	0.009647	61	0.962483	0.013965	35	0.967893	0.027603	37
0.109033	0.963474			0.962744			0.962993			0.966396
0.207567	0.963394			0.962771			0.962765			0.966317
0.308767	0.963972			0.964309			0.964035			0.967526
0.405	0.965142			0.965152			0.965467			0.968559
0.507583	0.966349			0.966586			0.966072			0.969106
0.60735	0.966985			0.967246			0.966446			0.969254
0.7074	0.967892			0.968004			0.967355			0.970177
0.806567	0.968531			0.968467			0.968632			0.97125
0.906533	0.96912			0.969346			0.969776			0.972234
1.00628	0.969571			0.969942			0.97017			0.9727
1.10838	0.970592			0.970758			0.970547			0.973261
1.20512	0.971213			0.971361			0.971809			0.974366
1.30638	0.971146			0.971579			0.972114			0.974905
1.40647	0.971579			0.971785			0.972973			0.975615
1.5063	0.972192			0.972284			0.973246			0.975389
1.60647	0.972685			0.972728			0.973892			0.976493
1.70627	0.972983			0.972915			0.974429			0.97663
1.80668	0.973448			0.973634			0.974728			0.977758
1.90633	0.973591			0.97367			0.97451			0.977213
2.00642	0.974207			0.974324			0.976238			0.978139
2.10632	0.974405			0.9744			0.975991			0.982526
2.2065	0.974892			0.974894			0.976819			0.978697
2.30637	0.974989			0.975082			0.976754			0.978629
2.40678	0.975454			0.975408			0.976828			0.978651
2.50653	0.975776	0.007412	58	0.975875	0.006742	61	0.978054	0.008176	35	0.979947	0.006275	37
2.60633	0.975572			0.975945			0.978051			0.979708
2.70843	0.97594			0.976299			0.978342			0.980164
2.80622	0.976552			0.976705			0.978766			0.980502
2.90722	0.976737			0.976953			0.979198			0.980828
3.00512	0.976791			0.977087			0.979383			0.980893
3.10525	0.977347			0.977351			0.979769			0.981295
3.20473	0.977682			0.977915			0.979838			0.981207
3.3051	0.977817			0.978076			0.980593			0.982047
3.40638	0.977824			0.978178			0.980721			0.981826
3.50663	0.978197			0.978498			0.981027			0.982478
3.60643	0.97832			0.978576			0.981178			0.982886
3.70638	0.97875			0.978916			0.981329			0.982771
3.80735	0.978914			0.979143			0.981357			0.982866
3.90668	0.978968			0.979269			0.981805			0.982956
4.00638	0.979287			0.979418			0.982269			0.983663
4.10643	0.979423			0.97943			0.982501			0.983651
4.20638	0.979396			0.979681			0.982481			0.983526
4.30743	0.97978			0.979861			0.982865			0.984
4.40515	0.98016			0.980203			0.983559			0.98458
4.50757	0.980419			0.980525			0.983048			0.984306
4.60682	0.980653			0.980777			0.983519			0.984547
4.7067	0.980616			0.98083			0.983819			0.984747
4.8065	0.980917			0.98122			0.983784			0.984558
4.90673	0.980916			0.981154			0.983952			0.984717
5.00647	0.981183	0.00613	58	0.981313	0.005646	61	0.984222	0.006694	35	0.984816	0.004556	37
5.10662	0.981492			0.98176			0.98421			0.985162
5.20642	0.981351			0.981549			0.984695			0.985557
5.3051	0.981532			0.981587			0.985038			0.985637
5.40512	0.981881			0.982023			0.985036			0.98576
5.50668	0.981827			0.981999			0.985222			0.98605
5.6066	0.982085			0.982206			0.985291			0.986134
5.70652	0.982386			0.982474			0.985413			0.986212
5.8065	0.982207			0.982475			0.985842			0.986411
5.90617	0.98267			0.98271			0.985613			0.98658
6.00685	0.98273			0.982778			0.985787			0.986858
6.10638	0.983051			0.983142			0.98634			0.987097
6.20632	0.983082			0.98337			0.986597			0.987258
6.30658	0.983006			0.983151			0.98639			0.987239
6.40643	0.983032			0.983275			0.986552			0.98728
6.50637	0.983479			0.983614			0.986423			0.987384
6.60653	0.983482			0.983601			0.986854			0.987701
6.70657	0.983762			0.983839			0.986804			0.987559
6.80642	0.983793			0.983814			0.98706			0.987771
6.90663	0.984145			0.98423			0.987032			0.987542
7.0072	0.984421			0.984526			0.987425			0.988078
7.1051	0.984399			0.98463			0.987507			0.988187
7.20513	0.98461			0.98455			0.987714			0.988245
7.30645	0.984782			0.984881			0.98755			0.988308
7.40672	0.984919			0.984955			0.988032			0.988719
7.50675	0.984952	0.005595	58	0.985065	0.004547	61	0.988378	0.005935	35	0.988824	0.004231	37
7.60663	0.985172			0.985383			0.988287			0.98883
7.7065	0.98521			0.985421			0.988441			0.988836
7.8064	0.985217			0.985286			0.988583			0.98919
7.90642	0.985458			0.985603			0.988756			0.989383
8.00642	0.985015			0.985169			0.988573			0.989058
8.10645	0.985669			0.985765			0.988559			0.989298
8.20668	0.985847			0.98594			0.988742			0.989357
8.30633	0.985979			0.98591			0.988781			0.989505
8.40633	0.986127			0.986141			0.989231			0.989669
8.50677	0.986404			0.986359			0.989194			0.989723
8.60518	0.986238			0.986369			0.989201			0.98982
8.70668	0.986303			0.986466			0.989372			0.990067
8.80648	0.986107			0.986338			0.989418			0.989908
8.90657	0.986622			0.98673			0.989608			0.989766
9.00685	0.986859			0.986992			0.989536			0.990247
9.10685	0.986851			0.98681			0.989755			0.990438
9.20642	0.987004			0.987026			0.989745			0.990445
9.30705	0.98723			0.987246			0.990336			0.990827
9.40668	0.987124			0.987203			0.990073			0.990491
9.50685	0.987308			0.987325			0.990459			0.990893
9.60662	0.987351			0.987583			0.990133			0.99065
9.70653	0.987578			0.987547			0.990169			0.990683
9.80655	0.987499			0.987593			0.990437			0.990938
9.90648	0.987671			0.987813			0.990586			0.990834
10.0069	0.987619	0.004747	58	0.987811	0.003906	61	0.990557	0.004289	35	0.991262	0.003503	37
10.1062	0.987804			0.98801			0.990561			0.990954
10.2063	0.987494			0.987648			0.990795			0.991132
10.3048	0.98841			0.988256			0.990885			0.991178
10.4073	0.988352			0.988493			0.990759			0.991222
10.5049	0.988304			0.988372			0.990988			0.991585
10.6083	0.988561			0.988633			0.990743			0.991223
10.7064	0.988458			0.988574			0.99136			0.991588
10.8064	0.988665			0.988632			0.991066			0.991873
10.9066	0.988869			0.988778			0.991394			0.991776
11.0052	0.988964			0.988909			0.991472			0.991905
11.1075	0.988894			0.988812			0.991493			0.991904
11.2053	0.988821			0.988891			0.991694			0.99213
11.3072	0.989158			0.989197			0.991784			0.992169
11.4064	0.989081			0.989041			0.99181			0.992241
11.5066	0.989201			0.989451			0.991449			0.992222
11.6065	0.989005			0.988857			0.991574			0.992359
11.7065	0.989393			0.989373			0.991992			0.99246
11.8065	0.989594			0.98983			0.991845			0.9926
11.9069	0.989684			0.989623			0.992035			0.992554
12.0067	0.98993			0.990009			0.991856			0.992367
12.1053	0.989781			0.989857			0.992193			0.992752
12.2065	0.989882			0.989934			0.992074			0.992436
12.3053	0.990051			0.990214			0.992392			0.99276
12.4064	0.990062			0.990163			0.992164			0.992764
12.5052	0.990316	0.003735	58	0.990168	0.003144	61	0.992116	0.003665	35	0.992817	0.003059	37
12.6065	0.990202			0.990309			0.992436			0.992951
12.7065	0.990193			0.990426			0.992691			0.993204
12.8065	0.990435			0.990569			0.992806			0.992982
12.9068	0.990495			0.99055			0.992887			0.99319
13.0064	0.990497			0.990414			0.992627			0.993229
13.1063	0.990743			0.990674			0.992917			0.993414
13.2075	0.990786			0.990853			0.992961			0.993395
13.3048	0.991004			0.990931			0.99296			0.993552
13.405	0.990919			0.990854			0.993398			0.99388
13.5052	0.991001			0.991098			0.993318			0.993455
13.6075	0.991188			0.991176			0.993329			0.993538
13.7073	0.991033			0.990985			0.993009			0.993488
13.8049	0.991368			0.99126			0.993365			0.994054
13.9062	0.991253			0.991205			0.993455			0.993789
14.0051	0.991685			0.991658			0.993694			0.994363
14.1065	0.991775			0.991641			0.9934			0.994
14.2067	0.991804			0.99173			0.993818			0.993979
14.3067	0.991838			0.991663			0.993562			0.994154
14.4066	0.99163			0.99152			0.993942			0.99449
14.5066	0.99166			0.991373			0.993768			0.994277
14.6069	0.991898			0.991786			0.993693			0.994206
14.7066	0.991827			0.991693			0.993982			0.994599
14.8065	0.991997			0.991986			0.993947			0.994664
14.9067	0.991954			0.99176			0.994636			0.994886
15.0066	0.99197	0.002846	58	0.991966	0.002822	61	0.994364	0.003624	35	0.9946	0.002766	37
15.1066	0.992085			0.991956			0.994209			0.994771
15.207	0.992136			0.992104			0.994354			0.994908
15.3066	0.992019			0.992086			0.994093			0.994873
15.4065	0.992039			0.992055			0.994231			0.994535
15.5065	0.992303			0.992264			0.994631			0.995243
15.6062	0.992444			0.992516			0.994474			0.995046
15.7051	0.992476			0.992669			0.994993			0.995173
15.8047	0.992369			0.992557			0.994351			0.994891
15.9049	0.992447			0.992586			0.994811			0.995331
16.005	0.99243			0.992675			0.994649			0.995216
16.1049	0.992682			0.992663			0.995212			0.995413
16.2068	0.992758			0.992631			0.995482			0.995596
16.3065	0.992803			0.992809			0.995339			0.995135
16.4078	0.992808			0.992771			0.995517			0.995525
16.5077	0.992884			0.99288			0.995859			0.995487
16.6075	0.992755			0.992747			0.995902			0.995534
16.7065	0.993048			0.99312			0.995793			0.99574
16.8066	0.993018			0.993043			0.995889			0.995624
16.9067	0.993058			0.993248			0.99602			0.995837
17.0068	0.993402			0.993377			0.996123			0.995898
17.1064	0.993229			0.993233			0.996342			0.996072
17.2068	0.993243			0.993225			0.995771			0.995672
17.3066	0.993421			0.993434			0.996			0.996246
17.4066	0.993397			0.993535			0.996275			0.996452
17.5066	0.993511	0.00255	58	0.99337	0.00246	61	0.996134	0.002519	35	0.996043	0.002097	37
17.6048	0.993696			0.993745			0.996069			0.996262
17.7051	0.99364			0.993645			0.996153			0.996449
17.8063	0.993951			0.993891			0.996285			0.996338
17.9067	0.993749			0.993766			0.99611			0.99616
18.0062	0.994143			0.994092			0.995996			0.996074
18.1049	0.994136			0.993945			0.99597			0.996427
18.2064	0.994079			0.994108			0.996014			0.99597
18.3065	0.994214			0.993979			0.996218			0.996426
18.4064	0.99441			0.994217			0.996129			0.996547
18.5063	0.994294			0.994144			0.996314			0.996573
18.6069	0.994479			0.994425			0.996241			0.996418
18.7066	0.994499			0.994429			0.99646			0.996326
18.8066	0.994695			0.994706			0.996565			0.996412
18.905	0.994763			0.994677			0.995918			0.99626
19.0067	0.994814			0.994783			0.996731			0.996563
19.1063	0.994854			0.994891			0.996505			0.996747
19.2068	0.994836			0.994859			0.996444			0.996631
19.3064	0.994965			0.994994			0.996594			0.996685
19.4066	0.994848			0.99493			0.9963			0.996616
19.506	0.995203			0.995044			0.99675			0.99684
19.6053	0.994992			0.994879			0.996603			0.996765
19.7065	0.99509			0.994989			0.996703			0.996814
19.805	0.995102			0.994934			0.996696			0.996645
19.9077	0.995118			0.994905			0.996549			0.99677
20.0053	0.995503	0.002066	58	0.995429	0.001931	61	0.996652	0.002001	35	0.997098	0.001524	37
20.1064	0.995578			0.99533			0.997044			0.997112
20.2064	0.99544			0.995261			0.99661			0.996947
20.3063	0.995516			0.995467			0.997134			0.997032
20.4073	0.995693			0.995698			0.996666			0.99709
20.5068	0.995682			0.99561			0.996485			0.996684
20.607	0.995777			0.995697			0.997035			0.997054
20.7066	0.995651			0.995573			0.997158			0.997505
20.8063	0.995721			0.995732			0.997073			0.997248
20.9065	0.995664			0.995603			0.996696			0.996906
21.0066	0.995752			0.995621			0.997181			0.997645
21.1066	0.995762			0.995719			0.997135			0.997363
21.2067	0.996103			0.995939			0.997308			0.997212
21.3065	0.996016			0.995874			0.997145			0.997407
21.4067	0.995962			0.995907			0.997234			0.997225
21.5063	0.99603			0.995981			0.997288			0.99739
21.6074	0.996202			0.996032			0.99717			0.997321
21.7066	0.996409			0.996243			0.99771			0.997634
21.8072	0.996348			0.996295			0.997485			0.99725
21.9066	0.996291			0.996309			0.997208			0.99725
22.0065	0.996269			0.996177			0.996969			0.997381
22.1064	0.996644			0.996637			0.997264			0.997491
22.2066	0.996437			0.996463			0.997352			0.997361
22.3067	0.996585			0.996403			0.997229			0.997489
22.4066	0.996668			0.99653			0.99779			0.997798
22.5076	0.996397	0.001341	58	0.996351	0.001374	61	0.997516	0.001437	35	0.997577	0.001194	37
22.6078	0.996682			0.996629			0.997452			0.997689
22.7051	0.996705			0.996635			0.997819			0.998068
22.8068	0.996698			0.996669			0.997725			0.99798
22.9066	0.997			0.996874			0.998178			0.99816
23.0051	0.996902			0.996753			0.997796			0.997902
23.1069	0.997008			0.996845			0.997917			0.997948
23.2064	0.997123			0.997013			0.998044			0.998168
23.305	0.996806			0.996774			0.99806			0.998031
23.406	0.997329			0.997105			0.998103			0.998203
23.5049	0.997378			0.997222			0.998448			0.998531
23.6071	0.997268			0.996945			0.99828			0.998229
23.7065	0.997208			0.997314			0.998631			0.998439
23.8073	0.997108			0.997196			0.998635			0.998551
23.905	0.997392			0.997332			0.998362			0.998436
24.0077	0.997443			0.997409			0.998226			0.998284
24.1053	0.997266			0.997232			0.998176			0.998532
24.2048	0.997522			0.997424			0.998753			0.998738
24.3066	0.997873			0.997805			0.998578			0.998391
24.4064	0.997699			0.997631			0.998586			0.998492
24.5051	0.997838			0.997759			0.9984			0.998387
24.6067	0.99783			0.997776			0.998428			0.998491
24.7066	0.997847			0.997912			0.998927			0.998804
24.8066	0.997837			0.997793			0.998563			0.998686
24.9067	0.998207			0.998183			0.998489			0.998459
25.0069	0.998155	0.001042	58	0.99802	0.00117	61	0.998923	0.001324	35	0.998723	0.000802	37
25.1064	0.998192			0.998133			0.99877			0.998811
25.2063	0.998087			0.997982			0.998869			0.998776
25.3075	0.998167			0.997974			0.99925			0.999091
25.4066	0.998201			0.998088			0.998981			0.998916
25.5066	0.9984			0.998358			0.999092			0.999052
25.6065	0.99844			0.998309			0.99889			0.999083
25.7065	0.998355			0.998361			0.998869			0.999097
25.8063	0.99852			0.998287			0.99914			0.99927
25.9075	0.998538			0.998437			0.999318			0.999181
26.0065	0.998388			0.998252			0.999124			0.999088
26.1067	0.998848			0.998829			0.999351			0.999149
26.2068	0.998608			0.99854			0.99896			0.998848
26.3068	0.998579			0.99854			0.999213			0.999327
26.4066	0.998872			0.998891			0.999431			0.999446
26.5068	0.998706			0.998709			0.999293			0.99926
26.6068	0.999123			0.998857			0.999113			0.999185
26.7066	0.998982			0.998884			0.999372			0.999247
26.8066	0.99911			0.99877			0.999755			0.999862
26.9068	0.998892			0.99868			0.999543			0.999511
27.0063	0.999096			0.998865			0.999714			0.999538
27.1066	0.999043			0.998992			0.999732			0.999501
27.2066	0.999145			0.999013			0.999344			0.99935
27.3068	0.999148			0.998993			0.999552			0.999568
27.4064	0.999297			0.999036			0.999857			0.999633
27.505	0.999257	0.00078	58	0.999162	0.000666	61	0.999587	0.000862	35	0.999381	0.000776	37
27.6051	0.999263			0.999147			0.99945			0.999216
27.7066	0.999407			0.999466			0.999839			0.999479
27.8066	0.999277			0.999199			0.999616			0.999598
27.9066	0.999502			0.99945			0.999834			0.999724
28.0068	0.999512			0.999618			0.999583			0.999766
28.1064	0.999604			0.999562			0.999484			0.999758
28.2063	0.999779			0.999618			0.999799			0.999739
28.3078	0.999876			0.999801			0.999643			0.999485
28.4051	0.999858			0.999781			1.00002			0.999809
28.5072	0.999992			1.00002			0.999554			0.999678
28.6066	1.0001			1.00001			0.999807			0.999951
28.7066	0.999913			0.999807			1.00004			1.00018
28.8068	1.00009			0.999954			1.00003			0.999893
28.9078	0.999796			0.999871			1.00002			0.999975
29.0051	0.999929			1.00002			0.999927			0.99967
29.1065	0.999911			0.999925			1.00002			0.999854
29.2064	1.00006			1.00018			1.00059			1.00041
29.3067	0.999997			1.00011			1.00026			1.00008
29.4069	0.999953			1.00005			0.999965			1.00002
29.5067	1.00024			1.00036			1.00041			1.0003
29.6068	1.00038			1.00035			1.00032			1.00041
29.7067	1.00032			1.00025			1.00011			1.00017
29.8069	1.00043			1.00038			1.00005			1.00023
29.9065	1.00027			1.00033			1.00038			1.00062
30.0067	1.0005	0.000628	58	1.00036	0.000647	61	1.00058	0.00089	35	1.00031	0.000888	37
30.1066	1.00046			1.00037			1.00022			1.00038
30.2066	1.00059			1.00058			1.00058			1.00064
30.3064	1.00045			1.00046			1.00063			1.00063
30.4074	1.00069			1.00065			1.00047			1.0004
30.5069	1.00096			1.00092			1.00082			1.00085
30.6064	1.00128			1.00123			1.00118			1.00098
30.7071	1.00176			1.00171			1.00225			1.00178
30.8069	1.00187			1.00173			1.00185			1.00122
30.9052	1.00166			1.00144			1.00177			1.00084
31.0066	1.00177			1.00143			1.00151			1.00042
31.1065	1.00146			1.00102			1.00099			0.99988
31.2066	1.00113			1.00062			1.00019			0.99918
31.3067	1.00088			1.00029			0.99967			0.998441
31.4066	1.00058			0.999866			0.998596			0.997075
31.5051	0.999887			0.999095			0.998005			0.996548
31.6075	0.999105			0.998253			0.997132			0.995469
31.7076	0.998943			0.99797			0.996712			0.995394
31.8078	0.997958			0.997014			0.995364			0.994303
31.9052	0.996932			0.995926			0.995028			0.99389
32.0053	0.996723			0.995641			0.994473			0.993401
32.1075	0.99618			0.994966			0.994123			0.992994
32.2074	0.995565			0.994408			0.993419			0.992392
32.308	0.99472			0.993576			0.993055			0.992265
32.4084	0.994028			0.992853			0.992935			0.9922
32.5064	0.993449	0.003327	58	0.992157	0.003804	61	0.992638	0.004582	35	0.991721	0.00469	37
32.6065	0.993006			0.991768			0.992485			0.991813
32.7066	0.992782			0.991457			0.992375			0.991571
32.8066	0.992238			0.99143			0.992488			0.991794
32.9066	0.992021			0.991256			0.992812			0.992066
33.0067	0.991406			0.99057			0.993069			0.992353
33.1068	0.991512			0.991014			0.993256			0.992608
33.2071	0.991196			0.991021			0.993207			0.992619
33.3067	0.991329			0.991313			0.99381			0.993494
33.4069	0.991636			0.992052			0.994587			0.994721
33.5067	0.992101			0.99267			0.995371			0.995441
33.6068	0.992085			0.993601			0.996034			0.996126
33.7064	0.992553			0.994247			0.99669			0.996933
33.8071	0.992925			0.995616			0.997707			0.998374
33.9066	0.9932			0.996182			0.999182			1.00051
34.0065	0.993533			0.997141			1.00014			1.0014
34.1064	0.994311			0.998215			1.00139			1.00262
34.2069	0.994973			0.999331			1.00289			1.00468
34.3067	0.996047			1.0017			1.00431			1.00594
34.4065	0.997182			1.00361			1.00603			1.00747
34.5066	0.998039			1.0056			1.00744			1.00953
34.6066	0.99943			1.00746			1.00944			1.01171
34.7068	1.00069			1.00946			1.01084			1.01341
34.8064	1.00137			1.0105			1.01292			1.01521
34.9065	1.0027			1.01268			1.01466			1.01669
35.0067	1.00373	0.018916	58	1.01377	0.033169	61	1.01662	0.020515	35	1.01862	0.024033	37
35.1065	1.00544			1.01572			1.01857			1.02044
35.2052	1.00717			1.01734			1.01994			1.02143
35.3066	1.00892			1.01923			1.02172			1.02303
35.4066	1.00994			1.01991			1.02296			1.02414
35.5063	1.01216			1.02241			1.02586			1.02654
35.6068	1.01374			1.0233			1.02745			1.02831
35.7066	1.01511			1.02491			1.0286			1.02958
35.807	1.01684			1.02678			1.02987			1.03052
35.9068	1.01777			1.02779			1.0318			1.03223
36.005	1.01894			1.02964			1.03335			1.03405
36.1078	1.02045			1.03097			1.03483			1.03571
36.205	1.02188			1.0327			1.03604			1.03707
36.3066	1.02289			1.03394			1.03715			1.03814
36.4066	1.02413			1.03537			1.0383			1.03949
36.5066	1.02532			1.03668			1.03964			1.0408
36.6068	1.02633			1.0381			1.04106			1.04212
36.707	1.02716			1.03923			1.04224			1.04271
36.8049	1.02795			1.04007			1.04412			1.04438
36.9054	1.02905			1.04147			1.04532			1.04549
37.0069	1.0298			1.04242			1.0461			1.04602
37.1066	1.0311			1.04396			1.0472			1.04704
37.2064	1.03207			1.04496			1.04785			1.04754
37.3063	1.03271			1.04552			1.04931			1.04912
37.408	1.03384			1.04688			1.04994			1.0495
37.5067	1.03444	0.03	58	1.04747	0.034397	61	1.04989	0.024324	35	1.04947	0.024709	37
37.6066	1.03525			1.04836			1.05151			1.05049
37.7069	1.03602			1.04889			1.05194			1.05073
37.8071	1.03681			1.04952			1.05307			1.05153
37.9067	1.03715			1.04999			1.054			1.0519
38.0066	1.03771			1.05096			1.05423			1.05226
38.1069	1.03847			1.05143			1.05485			1.05275
38.2066	1.03921			1.05205			1.0551			1.05271
38.3067	1.03933			1.05254			1.05623			1.05357
38.4066	1.03973			1.05291			1.05597			1.05335
38.5068	1.04035			1.05337			1.05624			1.05325
38.6068	1.04042			1.05332			1.05622			1.05336
38.707	1.04084			1.05362			1.05662			1.05387
38.8065	1.04118			1.05415			1.05738			1.05437
38.9081	1.04138			1.05434			1.05757			1.05444
39.0067	1.04144			1.05429			1.05787			1.05473
39.1067	1.04146			1.05453			1.05803			1.05468
39.2066	1.04168			1.05466			1.05813			1.05511
39.3067	1.04228			1.05538			1.05819			1.05495
39.4066	1.04224			1.05559			1.05828			1.05484
39.5067	1.04203			1.05563			1.0584			1.05477
39.6064	1.04243			1.05578			1.05917			1.05527
39.7067	1.04257			1.05602			1.05868			1.05537
39.8085	1.0427			1.0561			1.05896			1.0555
39.9067	1.04249			1.05612			1.05887			1.05516
40.0048	1.04263	0.025887	58	1.05595	0.024199	61	1.05903	0.022624	35	1.05526	0.026549	37
40.1066	1.04278			1.05622			1.05912			1.05545
40.2064	1.04282			1.05615			1.05927			1.05555
40.3066	1.04306			1.0566			1.05973			1.05591
40.4065	1.04299			1.05645			1.05959			1.05571
40.5067	1.04302			1.05601			1.0597			1.05577
40.6067	1.04323			1.05629			1.05971			1.05567
40.7067	1.04333			1.05621			1.0596			1.05569
40.807	1.04345			1.05598			1.05967			1.05599
40.9068	1.04321			1.05566			1.05949			1.05583
41.0067	1.04345			1.05555			1.05915			1.05545
41.1069	1.04336			1.05533			1.05889			1.05499
41.2069	1.04373			1.05546			1.05876			1.05475
41.3078	1.04346			1.05526			1.05864			1.05465
41.4068	1.04366			1.05513			1.05905			1.05497
41.5065	1.04346			1.05504			1.05929			1.05519
41.6069	1.04326			1.05476			1.05898			1.05489
41.7066	1.04321			1.05465			1.05902			1.05514
41.8066	1.04288			1.05448			1.05894			1.05509
41.9067	1.04296			1.05424			1.05879			1.05495
42.005	1.04318			1.05453			1.05847			1.05506
42.1068	1.04306			1.05444			1.05799			1.05444
42.2067	1.04299			1.05433			1.05788			1.05463
42.3067	1.04263			1.05377			1.05797			1.05445
42.4066	1.04279			1.05364			1.05763			1.05477
42.507	1.04257	0.02515	58	1.05348	0.023922	61	1.05724	0.025579	35	1.0541	0.030773	37
42.607	1.04239			1.05301			1.05735			1.05408
42.7071	1.04231			1.05281			1.05714			1.05412
42.807	1.04228			1.05275			1.05739			1.05438
42.9068	1.04198			1.05225			1.05679			1.05385
43.0067	1.04214			1.05217			1.05678			1.05411
43.1069	1.04184			1.05199			1.05682			1.05436
43.2067	1.04148			1.05163			1.05601			1.05366
43.3067	1.04145			1.05152			1.05613			1.05355
43.4067	1.04129			1.05125			1.05567			1.05332
43.5067	1.04122			1.05086			1.05563			1.05338
43.6067	1.04132			1.05058			1.0556			1.05327
43.7064	1.04123			1.05059			1.05523			1.0533
43.8078	1.04119			1.05025			1.05523			1.05316
43.9051	1.04084			1.04984			1.05518			1.05318
44.0085	1.04099			1.04982			1.0546			1.05281
44.1068	1.04121			1.04968			1.05416			1.05254
44.2073	1.04127			1.04948			1.05402			1.05249
44.3051	1.04096			1.04934			1.05376			1.05257
44.4066	1.0408			1.04882			1.05381			1.05274
44.5068	1.04049			1.04864			1.05323			1.05233
44.6067	1.04084			1.04854			1.053			1.05238
44.7066	1.04062			1.04837			1.05283			1.05196
44.8072	1.04063			1.04819			1.05233			1.05195
44.9066	1.04059			1.04825			1.05252			1.05236
45.0066	1.0402	0.026265	58	1.04804	0.026949	61	1.05196	0.02611	35	1.05226	0.034337	37
45.1067	1.04008			1.04811			1.05162			1.05202
45.2071	1.04004			1.04766			1.05117			1.05173
45.3068	1.04012			1.04753			1.0509			1.05178
45.4068	1.03987			1.04746			1.05068			1.05173
45.5067	1.03986			1.04747			1.05027			1.05152
45.6066	1.03967			1.04705			1.05021			1.0514
45.7071	1.03963			1.04682			1.04955			1.05084
45.8071	1.03965			1.04658			1.0492			1.05079
45.9068	1.03939			1.04648			1.04842			1.05043
46.0071	1.03956			1.04655			1.04832			1.05018
46.1069	1.03939			1.0463			1.04808			1.05005
46.2072	1.03901			1.04607			1.04806			1.05008
46.3069	1.03895			1.04605			1.04765			1.04984
46.4068	1.03873			1.04569			1.04862			1.05272
46.5066	1.03853			1.04536			1.04718			1.04962
46.6078	1.03826			1.04538			1.04696			1.04945
46.7075	1.03818			1.04531			1.04636			1.04912
46.8047	1.03809			1.04508			1.04664			1.04936
46.9059	1.03791			1.045			1.04604			1.04911
47.0052	1.03784			1.04474			1.046			1.04902
47.1069	1.03773			1.04449			1.04542			1.04849
47.207	1.03748			1.04451			1.04517			1.04824
47.3067	1.0373			1.0446			1.04491			1.04822
47.4068	1.03697			1.04405			1.04448			1.04785
47.5068	1.03694	0.025415	58	1.0441	0.026628	61	1.04449	0.02439	35	1.04803	0.034827	37
47.6071	1.03663			1.04387			1.0441			1.04774
47.7067	1.03642			1.04348			1.04383			1.04748
47.807	1.03633			1.04329			1.04369			1.04728
47.9067	1.03628			1.04339			1.04288			1.04677
48.0066	1.0361			1.04337			1.04307			1.04695
48.1069	1.0358			1.04312			1.04252			1.0465
48.2067	1.03569			1.04319			1.0425			1.04638
48.3066	1.03549			1.04272			1.04243			1.04652
48.407	1.03528			1.04276			1.04209			1.046
48.5067	1.03514			1.04267			1.0419			1.04608
48.6069	1.03505			1.04272			1.04163			1.04568
48.7064	1.03513			1.04254			1.04132			1.04568
48.8066	1.0347			1.04228			1.04098			1.04506
48.9078	1.0347			1.04226			1.04057			1.04476
49.0048	1.03461			1.04221			1.04			1.04424
49.1048	1.03435			1.0417			1.04017			1.04414
49.2075	1.03422			1.04171			1.03961			1.04356
49.308	1.03404			1.04128			1.03925			1.04317
49.4079	1.03388			1.04134			1.03936			1.04339
49.507	1.03372			1.04097			1.03876			1.04284
49.6066	1.03379			1.041			1.03839			1.04238
49.7068	1.03352			1.0406			1.03865			1.04238
49.8066	1.03345			1.04052			1.03834			1.042
49.9068	1.03364			1.04058			1.03809			1.04176
50.0069	1.0333	0.022103	58	1.0402	0.022636	61	1.03796	0.018145	35	1.04124	0.027723	37
50.1067	1.03327			1.03984			1.03767			1.04091
50.2067	1.03328			1.03996			1.03778			1.04104
50.3066	1.03303			1.04008			1.03734			1.04038
50.4066	1.03305			1.03988			1.03702			1.04004
50.5069	1.03268			1.0394			1.0371			1.03994
50.6069	1.03268			1.03939			1.03689			1.03967
50.7069	1.03271			1.03885			1.03698			1.03978
50.8068	1.03225			1.03875			1.03662			1.03922
50.9051	1.0325			1.03854			1.03616			1.0386
51.0069	1.03226			1.03834			1.03589			1.03838
51.1068	1.03218			1.03809			1.03557			1.03771
51.2067	1.03173			1.03795			1.0357			1.03764
51.3068	1.03182			1.03794			1.03516			1.03709
51.4084	1.0316			1.03732			1.03519			1.03695
51.507	1.0316			1.03732			1.03527			1.03709
51.6065	1.03159			1.03731			1.0348			1.03644
51.7073	1.03154			1.03735			1.03458			1.0362
51.806	1.03129			1.03693			1.03451			1.03592
51.9052	1.03088			1.03639			1.03428			1.03552
52.0067	1.03077			1.0361			1.03409			1.03512
52.1069	1.0306			1.03595			1.03386			1.03472
52.2069	1.03064			1.03625			1.03383			1.03463
52.3069	1.03023			1.03565			1.03346			1.03415
52.4069	1.0299			1.03521			1.03326			1.03405
52.5067	1.02996	0.01667	58	1.03544	0.016405	61	1.03327	0.01277	35	1.03411	0.017681	37
52.6049	1.02977			1.03512			1.03304			1.03356
52.7065	1.02965			1.03482			1.03295			1.03367
52.8051	1.02937			1.03467			1.03282			1.03344
52.9069	1.02925			1.03468			1.03304			1.03356
53.0071	1.02893			1.0344			1.03271			1.03316
53.107	1.02881			1.03413			1.03244			1.03272
53.2067	1.02862			1.03389			1.03262			1.03255
53.3066	1.0288			1.03379			1.03218			1.03216
53.4069	1.02884			1.03374			1.03255			1.03266
53.5069	1.02832			1.0331			1.03263			1.03254
53.607	1.02808			1.03292			1.03218			1.03204
53.7067	1.02818			1.03283			1.03244			1.03212
53.8049	1.02796			1.03274			1.03202			1.03216
53.9054	1.02798			1.03273			1.03188			1.03177
54.0067	1.02788			1.03247			1.03222			1.03204
54.1069	1.02778			1.03244			1.03189			1.03177
54.2067	1.02758			1.03208			1.03218			1.03175
54.3078	1.02755			1.03189			1.03181			1.03161
54.4081	1.02728			1.03167			1.03177			1.03165
54.5078	1.02722			1.03152			1.03175			1.03146
54.6047	1.02701			1.0315			1.03174			1.03123
54.707	1.02707			1.03159			1.03188			1.03105
54.8069	1.02685			1.0314			1.03181			1.0308
54.907	1.02677			1.03127			1.03163			1.03077
55.0077	1.02682	0.01152	58	1.03134	0.01205	61	1.0314	0.011323	35	1.03071	0.011769	37
55.1082	1.02666			1.03096			1.03166			1.03075
55.2067	1.02688			1.03116			1.03151			1.03065
55.3072	1.02702			1.03129			1.03147			1.03057
55.4068	1.02672			1.03122			1.0312			1.03026
55.5067	1.02653			1.0311			1.03101			1.03016
55.6066	1.02663			1.03111			1.03127			1.03013
55.7067	1.0268			1.03104			1.03111			1.03017
55.8065	1.02658			1.03065			1.03114			1.03013
55.9072	1.02657			1.03056			1.03083			1.02988
56.0074	1.02674			1.03073			1.03127			1.03013
56.1067	1.02686			1.03089			1.03066			1.02977
56.2066	1.02688			1.03092			1.03067			1.02966
56.3066	1.02676			1.03076			1.03073			1.03005
56.4082	1.02659			1.03076			1.03074			1.02994
56.5078	1.02679			1.03082			1.03093			1.03043
56.6073	1.02665			1.03068			1.03066			1.03023
56.7078	1.02656			1.03062			1.03033			1.02982
56.8081	1.02644			1.03056			1.03013			1.02966
56.908	1.02648			1.03069			1.03044			1.0296
57.0066	1.02661			1.03085			1.03049			1.02987
57.106	1.02649			1.03099			1.03081			1.03009
57.205	1.02645			1.03109			1.03019			1.03001
57.3077	1.02647			1.03088			1.03097			1.03013
57.4051	1.02634			1.03071			1.03048			1.02975
			0			1			0			0
