# Supplementary material for: β-cell deletion of the PKm1 and PKm2 isoforms of pyruvate kinase in mice reveals their essential role as nutrient sensors for the KATP channel
Source: eLife. 2022 Aug 23;11:e79422. doi: 10.7554/eLife.79422 (PMC9444242; doi:10.7554/eLife.79422)
Supplement: Figure 6—source data 1. [file elife-79422-fig6-data1.xlsx]

## Sheet: 6A
Average traces									AUC
	Con			PCK2 KO					WT	PCK2 KO
mins	average	stdev	n	average	stdev	n			0.8865	0.1586
0.004933	0.956641	0.014976	101	0.957318	0.015396	98			0.8302	0.9454
0.109033	0.955097			0.956092					0.8858	0.7662
0.207567	0.957818			0.959002					1.151	0.7636
0.308767	0.959583			0.959915					0.301	0.6697
0.405	0.960142			0.96061					0.7238	0.6034
0.507583	0.960461			0.961328					0.4514	0.4541
0.60735	0.961746			0.962458					0.6948	0.7452
0.7074	0.963268			0.964019					0.5878	0.3041
0.806567	0.964196			0.964851					0.9163	0.3446
0.906533	0.96488			0.965425					1.629	0.608
1.00628	0.966218			0.966804					0.4859	0.5026
1.10838	0.967086			0.967797					0.3129	0.437
1.20512	0.967978			0.968619					0.809	0.4937
1.30638	0.968938			0.96929					0.3625	0.4869
1.40647	0.969191			0.969654					0.7015	0.7328
1.5063	0.969828			0.970298					0.5635	0.2835
1.60647	0.970555			0.970696					0.2333	0.3994
1.70627	0.970964			0.971331					0.4021	0.6594
1.80668	0.971858			0.971915					0.5838	0.8765
1.90633	0.972224			0.972236					0.4232	0.2256
2.00642	0.972634			0.972525					0.8659	0.5749
2.10632	0.972891			0.972734					0.5782	0.9128
2.2065	0.973283			0.973204					0.4891	0.6635
2.30637	0.973612			0.97369					0.548	0.2679
2.40678	0.974204			0.974307					0.4102	0.3142
2.50653	0.974451	0.010101	101	0.974406	0.011	98			0.7346	0.5021
2.60633	0.974754			0.974663					0.3028	0.1492
2.70843	0.975172			0.975166					0.1735	0.362
2.80622	0.975711			0.975661					0.2193	0.413
2.90722	0.975939			0.975678					0.5162	0.2983
3.00512	0.976384			0.976193					0.4783	0.3609
3.10525	0.976645			0.976606					0.3409	0.1997
3.20473	0.97714			0.977086					0.3324	0.7166
3.3051	0.977369			0.977396					0.343	0.1932
3.40638	0.977808			0.977793					0.3424	0.3452
3.50663	0.978251			0.978116					0.3261	0.3383
3.60643	0.97855			0.978525					0.6968	0.573
3.70638	0.978886			0.978706					0.6602	0.7078
3.80735	0.979219			0.979225					0.5797	0.6266
3.90668	0.97963			0.979462					0.4204	0.8086
4.00638	0.979803			0.979642					0.3734	0.8181
4.10643	0.980253			0.980142					0.8145	1.27
4.20638	0.980512			0.980492					1.094	0.7912
4.30743	0.980812			0.980781					1.076	0.2062
4.40515	0.981219			0.981171					1.237	0.6477
4.50757	0.981446			0.981268					0.6632	0.3831
4.60682	0.981668			0.981723					0.8572	0.6459
4.7067	0.981966			0.982071					0.7465	0.4781
4.8065	0.982229			0.982294					0.7652	0.7655
4.90673	0.982474			0.982501					0.9379	0.3023
5.00647	0.982648	0.006768	101	0.982779	0.007328	98			0.5379	0.6343
5.10662	0.982914			0.983006					0.9585	0.2401
5.20642	0.98322			0.983273					0.8523	0.2165
5.3051	0.983252			0.983235					0.8658	0.2043
5.40512	0.983609			0.983682					0.7468	0.3804
5.50668	0.983989			0.983901					0.6498	0.3248
5.6066	0.983933			0.984067					0.7711	0.3801
5.70652	0.984428			0.984485					0.6897	0.3756
5.8065	0.98439			0.984569					0.7385	0.3127
5.90617	0.984572			0.984697					0.5406	0.3089
6.00685	0.984765			0.984922					0.8819	0.443
6.10638	0.985118			0.985166					0.7441	0.167
6.20632	0.985008			0.98516					0.7814	0.2553
6.30658	0.985382			0.985472					0.6805	0.6968
6.40643	0.98539			0.985496					0.6515	0.665
6.50637	0.985864			0.985963					0.6027	0.6786
6.60653	0.985924			0.986054					0.8551	0.433
6.70657	0.985921			0.985879					0.9662	1.018
6.80642	0.986132			0.986177					0.8789	0.6392
6.90663	0.986253			0.98632					0.7206	0.4625
7.0072	0.986444			0.986547					1.143	0.4226
7.1051	0.986493			0.986507					1.1	1.015
7.20513	0.986943			0.986799					1.053	0.7193
7.30645	0.98705			0.986942					0.9815	0.2139
7.40672	0.987052			0.987099					0.9466	0.3947
7.50675	0.987286	0.005573	101	0.987163	0.006161	98			0.7771	0.2421
7.60663	0.987378			0.987374					0.5064	0.2225
7.7065	0.987593			0.987458					0.3284	0.3298
7.8064	0.987699			0.987672					0.4608	0.3271
7.90642	0.987616			0.987691					0.1965	0.3716
8.00642	0.987782			0.987879					0.51	0.499
8.10645	0.987875			0.987869					0.6413	0.2293
8.20668	0.988144			0.98815					0.3115	0.5354
8.30633	0.988028			0.98798					0.6568	0.548
8.40633	0.98833			0.9882					0.5712	0.473
8.50677	0.988297			0.98831					0.7385	0.4571
8.60518	0.988467			0.988467					0.6526	0.5553
8.70668	0.98861			0.98864					0.5557	0.3992
8.80648	0.988784			0.988855					0.6402	0.3417
8.90657	0.988759			0.988873					0.5621	0.2982
9.00685	0.988876			0.988937					0.5292	0.2018
9.10685	0.989075			0.98909					0.3854	0.6666
9.20642	0.988991			0.988992					0.6072	0.3298
9.30705	0.989373			0.989237					0.6159	0.7232
9.40668	0.989472			0.989422					0.749	0.7023
9.50685	0.989636			0.989302					0.7432	0.419
9.60662	0.989665			0.989437					0.8638	0.3499
9.70653	0.989857			0.989639					0.6248
9.80655	0.989743			0.989566					0.6386
9.90648	0.989881			0.989717					0.6103
10.0069	0.989847	0.004656	101	0.989742	0.004758	98
10.1062	0.990004			0.98971
10.2063	0.989978			0.98981
10.3048	0.990126			0.989808
10.4073	0.990431			0.990175
10.5049	0.990485			0.990246
10.6083	0.99024			0.99005
10.7064	0.990492			0.990293
10.8064	0.990506			0.990227
10.9066	0.991036			0.990677
11.0052	0.990759			0.990521
11.1075	0.990923			0.990661
11.2053	0.991036			0.99076
11.3072	0.990935			0.990687
11.4064	0.991037			0.990815
11.5066	0.991317			0.990949
11.6065	0.991227			0.990865
11.7065	0.991391			0.990977
11.8065	0.991537			0.991217
11.9069	0.991535			0.991154
12.0067	0.991464			0.991077
12.1053	0.991586			0.991236
12.2065	0.991735			0.99138
12.3053	0.991739			0.991459
12.4064	0.992038			0.991723
12.5052	0.991876	0.004016	101	0.99143	0.004047	98
12.6065	0.992072			0.99159
12.7065	0.992077			0.991652
12.8065	0.992136			0.991744
12.9068	0.99208			0.991628
13.0064	0.992319			0.991808
13.1063	0.992368			0.991944
13.2075	0.992536			0.992016
13.3048	0.99244			0.991935
13.405	0.992457			0.991884
13.5052	0.992597			0.992037
13.6075	0.992647			0.992107
13.7073	0.9927			0.992112
13.8049	0.992697			0.992218
13.9062	0.992942			0.992344
14.0051	0.992824			0.992196
14.1065	0.992998			0.992423
14.2067	0.993091			0.992611
14.3067	0.993002			0.992477
14.4066	0.993093			0.99255
14.5066	0.992915			0.992453
14.6069	0.993306			0.99269
14.7066	0.993199			0.99265
14.8065	0.993318			0.992738
14.9067	0.993504			0.992899
15.0066	0.993486	0.003441	101	0.992992	0.003554	98
15.1066	0.993597			0.992914
15.207	0.993564			0.992956
15.3066	0.993444			0.993085
15.4065	0.993598			0.993083
15.5065	0.993684			0.993049
15.6062	0.99366			0.993227
15.7051	0.993826			0.993205
15.8047	0.993847			0.993275
15.9049	0.994067			0.993545
16.005	0.994015			0.993345
16.1049	0.9939			0.99354
16.2068	0.993868			0.993341
16.3065	0.993993			0.993492
16.4078	0.994175			0.993694
16.5077	0.994329			0.993809
16.6075	0.994226			0.993789
16.7065	0.994381			0.993793
16.8066	0.994487			0.993937
16.9067	0.994448			0.993867
17.0068	0.994499			0.993881
17.1064	0.994774			0.994166
17.2068	0.994652			0.99403
17.3066	0.994401			0.993978
17.4066	0.994567			0.994223
17.5066	0.994502	0.003379	101	0.994043	0.00304	98
17.6048	0.994626			0.994158
17.7051	0.994666			0.994307
17.8063	0.99485			0.994463
17.9067	0.995039			0.994617
18.0062	0.994866			0.994382
18.1049	0.994632			0.994127
18.2064	0.994804			0.994287
18.3065	0.994923			0.994458
18.4064	0.995039			0.994544
18.5063	0.995113			0.994606
18.6069	0.995185			0.994696
18.7066	0.995149			0.994606
18.8066	0.995112			0.994642
18.905	0.995374			0.994834
19.0067	0.995233			0.9948
19.1063	0.995493			0.994948
19.2068	0.995323			0.994892
19.3064	0.99541			0.994866
19.4066	0.995588			0.995085
19.506	0.995533			0.995052
19.6053	0.995574			0.995167
19.7065	0.995576			0.99509
19.805	0.995481			0.995075
19.9077	0.995633			0.995149
20.0053	0.996053	0.002934	101	0.995444	0.002762	98
20.1064	0.996165			0.995624
20.2064	0.996273			0.995854
20.3063	0.996056			0.995636
20.4073	0.996042			0.995736
20.5068	0.99632			0.99582
20.607	0.996245			0.995862
20.7066	0.996323			0.995972
20.8063	0.996121			0.995761
20.9065	0.996344			0.995949
21.0066	0.996354			0.995919
21.1066	0.996643			0.99614
21.2067	0.99648			0.996207
21.3065	0.996666			0.996139
21.4067	0.996804			0.99643
21.5063	0.996981			0.996447
21.6074	0.996916			0.996474
21.7066	0.996976			0.996567
21.8072	0.997179			0.996758
21.9066	0.997177			0.996772
22.0065	0.997127			0.996758
22.1064	0.997178			0.996804
22.2066	0.99739			0.996985
22.3067	0.997348			0.996887
22.4066	0.997427			0.997029
22.5076	0.997267	0.001495	101	0.996771	0.001585	98
22.6078	0.997453			0.996976
22.7051	0.997516			0.997047
22.8068	0.997369			0.997064
22.9066	0.997438			0.997152
23.0051	0.997583			0.99719
23.1069	0.997544			0.997193
23.2064	0.997228			0.997174
23.305	0.997755			0.997487
23.406	0.99773			0.997437
23.5049	0.99774			0.997424
23.6071	0.997812			0.997461
23.7065	0.997726			0.997595
23.8073	0.997839			0.997686
23.905	0.997959			0.997715
24.0077	0.997956			0.997698
24.1053	0.997951			0.997649
24.2048	0.997976			0.997672
24.3066	0.997969			0.997694
24.4064	0.997953			0.997523
24.5051	0.99819			0.998025
24.6067	0.998215			0.997768
24.7066	0.998042			0.997741
24.8066	0.998738			0.998552
24.9067	0.998353			0.997924
25.0069	0.998556	0.001168	101	0.998322	0.001152	98
25.1064	0.998436			0.998256
25.2063	0.998294			0.998247
25.3075	0.998499			0.99837
25.4066	0.998412			0.998305
25.5066	0.998623			0.998474
25.6065	0.998611			0.998443
25.7065	0.998696			0.998513
25.8063	0.998653			0.99846
25.9075	0.999003			0.998797
26.0065	0.998802			0.99856
26.1067	0.998782			0.998713
26.2068	0.999188			0.999092
26.3068	0.999175			0.998962
26.4066	0.999169			0.998963
26.5068	0.999109			0.998973
26.6068	0.999221			0.999029
26.7066	0.999382			0.99921
26.8066	0.999204			0.998976
26.9068	0.999409			0.99916
27.0063	0.999393			0.99923
27.1066	0.999508			0.999296
27.2066	0.999366			0.999168
27.3068	0.999369			0.999124
27.4064	0.999406			0.999314
27.505	0.999458	0.000795	101	0.999391	0.000747	98
27.6051	0.999527			0.999402
27.7066	0.999743			0.999584
27.8066	0.99968			0.999556
27.9066	0.999675			0.99953
28.0068	0.999802			0.999705
28.1064	0.999778			0.999706
28.2063	0.999787			0.999697
28.3078	0.999824			0.999649
28.4051	0.999735			0.999707
28.5072	0.999873			0.999716
28.6066	0.999773			0.999744
28.7066	0.9998			0.999649
28.8068	0.999996			1.00023
28.9078	0.999951			0.999963
29.0051	0.999861			1.00004
29.1065	1.00019			1.00025
29.2064	1.0001			1.00005
29.3067	0.99995			0.999986
29.4069	1.00009			1.00014
29.5067	1.00016			1.00021
29.6068	1.00026			1.00027
29.7067	1.00045			1.00057
29.8069	1.00028			1.00036
29.9065	1.00036			1.00037
30.0067	1.00048	0.000725	101	1.00059	0.00059	98
30.1066	1.00048			1.00063
30.2066	1.0004			1.00058
30.3064	1.00073			1.00069
30.4074	1.00078			1.00076
30.5069	1.00089			1.00096
30.6064	1.00078			1.0009
30.7071	1.0009			1.00107
30.8069	1.00144			1.00174
30.9052	1.00144			1.00194
31.0066	1.00174			1.00209
31.1065	1.00131			1.00205
31.2066	1.00149			1.00216
31.3067	1.0015			1.00232
31.4066	1.00078			1.00191
31.5051	1.00047			1.00157
31.6075	1.00009			1.0014
31.7076	0.999279			1.00072
31.8078	0.99899			1.00056
31.9052	0.998249			1.00007
32.0053	0.997606			0.999655
32.1075	0.997008			0.999308
32.2074	0.996468			0.998797
32.308	0.995445			0.998115
32.4084	0.995073			0.997605
32.5064	0.994267	0.006403	101	0.996711	0.005792	98
32.6065	0.993837			0.996476
32.7066	0.993416			0.996084
32.8066	0.992826			0.995667
32.9066	0.992128			0.995074
33.0067	0.992017			0.995025
33.1068	0.991785			0.994819
33.2071	0.991598			0.994721
33.3067	0.99135			0.994573
33.4069	0.991266			0.994562
33.5067	0.991301			0.994506
33.6068	0.991245			0.994516
33.7064	0.991301			0.994385
33.8071	0.991445			0.99476
33.9066	0.992061			0.99516
34.0065	0.992364			0.995226
34.1064	0.992622			0.995327
34.2069	0.993547			0.995929
34.3067	0.994451			0.996523
34.4065	0.995079			0.997029
34.5066	0.996002			0.997459
34.6066	0.997232			0.998144
34.7068	0.998777			0.999204
34.8064	1.00011			0.999995
34.9065	1.00122			1.00077
35.0067	1.00313	0.017621	101	1.00165	0.012345	98
35.1065	1.0048			1.0027
35.2052	1.0064			1.00388
35.3066	1.00856			1.00503
35.4066	1.01064			1.00618
35.5063	1.01288			1.00766
35.6068	1.01485			1.00874
35.7066	1.01742			1.01009
35.807	1.01987			1.01128
35.9068	1.02247			1.01259
36.005	1.02479			1.01383
36.1078	1.02709			1.01533
36.205	1.02918			1.01627
36.3066	1.03117			1.01771
36.4066	1.03292			1.01836
36.5066	1.03504			1.01949
36.6068	1.03724			1.02064
36.707	1.03915			1.02156
36.8049	1.04096			1.02259
36.9054	1.04243			1.02354
37.0069	1.0441			1.02457
37.1066	1.04558			1.02521
37.2064	1.0475			1.02612
37.3063	1.04884			1.02688
37.408	1.05009			1.02756
37.5067	1.05143	0.034366	101	1.02874	0.025815	98
37.6066	1.05255			1.02954
37.7069	1.0539			1.03026
37.8071	1.05466			1.03104
37.9067	1.05553			1.03189
38.0066	1.05659			1.03277
38.1069	1.05723			1.03345
38.2066	1.05805			1.03409
38.3067	1.05859			1.03442
38.4066	1.05964			1.03512
38.5068	1.06012			1.03586
38.6068	1.06045			1.03647
38.707	1.06066			1.03665
38.8065	1.06134			1.03707
38.9081	1.0618			1.03761
39.0067	1.0622			1.03817
39.1067	1.06218			1.03813
39.2066	1.06231			1.03849
39.3067	1.06265			1.0391
39.4066	1.0626			1.03965
39.5067	1.0627			1.03978
39.6064	1.06274			1.03987
39.7067	1.06268			1.03985
39.8085	1.06276			1.04031
39.9067	1.0625			1.04051
40.0048	1.06229	0.029385	101	1.04047	0.025192	98
40.1066	1.06209			1.04057
40.2064	1.06162			1.04025
40.3066	1.06138			1.04048
40.4065	1.06125			1.04063
40.5067	1.0611			1.04099
40.6067	1.06078			1.04087
40.7067	1.06009			1.04063
40.807	1.06015			1.04119
40.9068	1.05969			1.04098
41.0067	1.05961			1.04131
41.1069	1.05943			1.04118
41.2069	1.05906			1.041
41.3078	1.05853			1.041
41.4068	1.05826			1.0413
41.5065	1.05791			1.04133
41.6069	1.05739			1.04104
41.7066	1.05683			1.04085
41.8066	1.05642			1.04105
41.9067	1.05593			1.04115
42.005	1.05518			1.04066
42.1068	1.05495			1.04083
42.2067	1.05452			1.0408
42.3067	1.05399			1.04062
42.4066	1.05344			1.04052
42.507	1.05308	0.026489	101	1.04025	0.02151	98
42.607	1.05249			1.04001
42.7071	1.05176			1.03992
42.807	1.05109			1.03969
42.9068	1.05072			1.0397
43.0067	1.04992			1.03931
43.1069	1.04906			1.03891
43.2067	1.04822			1.03876
43.3067	1.04784			1.039
43.4067	1.04737			1.03866
43.5067	1.047			1.03869
43.6067	1.04624			1.03837
43.7064	1.04524			1.03782
43.8078	1.04465			1.0376
43.9051	1.04403			1.03744
44.0085	1.04335			1.03723
44.1068	1.04276			1.03676
44.2073	1.04225			1.03653
44.3051	1.04142			1.03591
44.4066	1.04087			1.03552
44.5068	1.04028			1.0353
44.6067	1.03974			1.03488
44.7066	1.0393			1.03461
44.8072	1.03855			1.03387
44.9066	1.03789			1.03352
45.0066	1.0374	0.018355	101	1.03318	0.016808	98
45.1067	1.03692			1.03291
45.2071	1.03645			1.03261
45.3068	1.03602			1.03243
45.4068	1.0355			1.03232
45.5067	1.03505			1.03207
45.6066	1.03416			1.03142
45.7071	1.03376			1.03114
45.8071	1.03346			1.03081
45.9068	1.03319			1.03055
46.0071	1.03277			1.03039
46.1069	1.03222			1.02996
46.2072	1.03187			1.02991
46.3069	1.03142			1.0296
46.4068	1.03099			1.02912
46.5066	1.03079			1.02887
46.6078	1.03048			1.02871
46.7075	1.03015			1.02838
46.8047	1.02974			1.02818
46.9059	1.02945			1.02788
47.0052	1.02907			1.02756
47.1069	1.0284			1.02691
47.207	1.02833			1.02703
47.3067	1.02801			1.02669
47.4068	1.02782			1.0266
47.5068	1.02766	0.012683	101	1.02651	0.013286	98
47.6071	1.02708			1.02614
47.7067	1.02668			1.02581
47.807	1.02679			1.02584
47.9067	1.02632			1.02553
48.0066	1.02631			1.02542
48.1069	1.02586			1.02512
48.2067	1.02585			1.02524
48.3066	1.02543			1.02474
48.407	1.02504			1.02437
48.5067	1.02486			1.02426
48.6069	1.02472			1.02424
48.7064	1.02469			1.02405
48.8066	1.02466			1.0239
48.9078	1.02422			1.02353
49.0048	1.02414			1.02329
49.1048	1.02404			1.02323
49.2075	1.02405			1.02336
49.308	1.02391			1.02341
49.4079	1.0238			1.02327
49.507	1.02346			1.02291
49.6066	1.02356			1.02298
49.7068	1.02338			1.02287
49.8066	1.0231			1.02263
49.9068	1.023			1.02257
50.0069	1.023	0.010026	101	1.02244	0.009861	98
50.1067	1.02307			1.02263
50.2067	1.02304			1.0226
50.3066	1.02294			1.02263
50.4066	1.02299			1.02264
50.5069	1.02271			1.02237
50.6069	1.02238			1.02211
50.7069	1.02251			1.02202
50.8068	1.02274			1.02213
50.9051	1.02256			1.02201
51.0069	1.02255			1.02216
51.1068	1.02249			1.02198
51.2067	1.02233			1.02187
51.3068	1.02227			1.02193
51.4084	1.02207			1.02186
51.507	1.02202			1.02171
51.6065	1.02202			1.02182
51.7073	1.02211			1.0218
51.806	1.02186			1.02178
51.9052	1.02202			1.02179
52.0067	1.02222			1.02207
52.1069	1.02218			1.02198
52.2069	1.02191			1.02184
52.3069	1.02187			1.02166
52.4069	1.02194			1.02168
52.5067	1.02202	0.009438	101	1.02155	0.009372	98
52.6049	1.0222			1.02182
52.7065	1.02213			1.02206
52.8051	1.0221			1.02198
52.9069	1.02172			1.02163
53.0071	1.02161			1.02142
53.107	1.02194			1.02165
53.2067	1.02196			1.02173
53.3066	1.02207			1.02185
53.4069	1.02216			1.02191
53.5069	1.02205			1.02177
53.607	1.02212			1.02174
53.7067	1.02214			1.02169
53.8049	1.02214			1.02182
53.9054	1.02193			1.02176
54.0067	1.02201			1.02157
54.1069	1.02206			1.02158
54.2067	1.02223			1.02185
54.3078	1.0221			1.0217
54.4081	1.02199			1.02173
54.5078	1.02212			1.02171
54.6047	1.02234			1.02188
54.707	1.02211			1.02168
54.8069	1.02199			1.02163
54.907	1.02189			1.02159
55.0077	1.02222	0.009305	101	1.02182	0.00864	98
55.1082	1.02232			1.02198
55.2067	1.02224			1.02208
55.3072	1.02238			1.02213
55.4068	1.02239			1.02205
55.5067	1.02247			1.02207
55.6066	1.02253			1.02201
55.7067	1.02269			1.02223
55.8065	1.02294			1.02253
55.9072	1.02323			1.02262
56.0074	1.02355			1.02252
56.1067	1.02338			1.02238
56.2066	1.02328			1.02254
56.3066	1.02352			1.02273
56.4082	1.02398			1.02309
56.5078	1.02417			1.02307
56.6073	1.0239			1.02289
56.7078	1.0239			1.02296
56.8081	1.0235			1.02339
56.908	1.01993			1.0219
57.0066	1.02019			1.02199
57.106	1.02206			1.02339
57.205	1.02206			1.02298
57.3077	1.02222			1.02329
57.4051	1.02214			1.02296

## Sheet: 6B
Average													AUC
Time (min)	WT					PCK2 KO							WT	PCK2 KO
1.5	0.00011	0.000138	0.000102	0.000107	1.36e-05	0.000426	0.000139	0.000181	0.000298	0.000161			0.03386	0.01601
3	0.000122	0.000147	0.000116	7.57e-05	0	0.000271	0.000113	0.000173	0.000163	0.000182			0.02906	0.01034
4.5	3.09e-05	0.000157	0	9.67e-05	4.75e-05	0.000184	0.000144	0.00024	0.000135	0.000139			0.02572	0.01652
6	0.00448	0.006928	0.002736	0.0024	0.003413	0.00099	0.001214	0.00121	0.000816	0.000887			0.02647	0.01219
7.5	0.013399	0.009659	0.010929	0.011926	0.007594	0.005646	0.003451	0.00689	0.004929	0.004254			0.01877	0.01215
9	0.00293	0.001399	0.002005	0.002065	0.001116	0.00234	0.00109	0.001542	0.001184	0.001775
10.5	0.000788	0.000536	0.000711	0.000535	0.000209	0.00068	0.000424	0.000504	0.000433	0.00053
12	0.000394	0.000334	0.000412	0.000317	9.66e-05	0.000411	0.000303	0.000343	0.000332	0.000306
13.5	0.000386	0.000296	0.000231	0.000219	2.49e-05	0.000317	0.00022	0.000264	0.000254	0.000191
15	0.000367	0.000281	0.00024	0.000277	7.17e-05	0.000389	0.000237	0.000281	0.000222	0.000181

## Sheet: 6C
Average														AUC
Time (min)	WT						PCK2 KO								WT						PCK2 KO
1.5	0.000166	0	9.65e-05	8.73e-05	0.000169	0	0	6.07e-05	4.04e-05	0	5.86e-05	3.78e-05		10G	0.02794	0.02999	0.02672	0.01931	0.01199	0.02152	0.02966	0.02197	0.02819	0.03597	0.0422	0.02699
3	0.000123	7.52e-05	9.14e-05	0	0.000164	0	0	0	0	0	0	0		10G/QRLA	0.04733	0.05525	0.0487	0.03351	0.02211	0.04025	0.07163	0.05535	0.0525	0.08424	0.09058	0.06526
4.5	0.00059	0.000533	0.000243	0.000324	0.000293	0.00145	0.000474	0.000745	0.000264	0.000968	0.000417	0.000853
6	0.00826	0.011064	0.009295	0.007229	0.003984	0.007118	0.010183	0.008315	0.010525	0.012687	0.014066	0.00803
7.5	0.002196	0.002857	0.00267	0.001822	0.00113	0.001766	0.003241	0.00155	0.002981	0.003409	0.005345	0.002792
9	0.002007	0.001588	0.001384	0.000897	0.000619	0.000958	0.001265	0.000933	0.001186	0.00168	0.002253	0.001451
10.5	0.00147	0.001104	0.001131	0.000723	0.000509	0.000806	0.001368	0.000619	0.000826	0.001396	0.001637	0.001226
12	0.001606	0.000999	0.001028	0.000656	0.000499	0.000739	0.001039	0.000883	0.001046	0.001416	0.001454	0.001234
13.5	0.001785	0.001359	0.001271	0.000805	0.000715	0.001154	0.00146	0.001232	0.001346	0.001836	0.002149	0.001892
15	0.002017	0.00151	0.001821	0.00116	0.000786	0.002155	0.001966	0.001478	0.001507	0.002146	0.002041	0.001889
16.5	0.006041	0.011819	0.008716	0.006454	0.004262	0.009362	0.014883	0.011644	0.011126	0.019603	0.019648	0.012724
18	0.00491	0.00582	0.005536	0.003447	0.001889	0.004262	0.004393	0.002521	0.002678	0.00371	0.006209	0.003908
19.5	0.003389	0.004253	0.003722	0.002683	0.0018	0.003465	0.00386	0.003058	0.002751	0.004282	0.005325	0.003774
21	0.004592	0.00425	0.003827	0.002683	0.001845	0.003459	0.00516	0.004354	0.004263	0.00571	0.006258	0.004728
22.5	0.003661	0.003707	0.003401	0.002422	0.001594	0.002953	0.006088	0.004607	0.004357	0.006269	0.006925	0.006286
24	0.003293	0.004181	0.003687	0.002954	0.001988	0.002943	0.007177	0.006104	0.005455	0.009058	0.009729	0.006554
25.5	0.006247	0.005777	0.005369	0.003362	0.002361	0.003392	0.009859	0.007489	0.007242	0.012042	0.010685	0.008517
27	0.004883	0.005876	0.005127	0.003118	0.002264	0.003353	0.007545	0.005896	0.005384	0.01057	0.010865	0.006751

## Sheet: 6D
Average traces									AUC
	WT			PKM1 KO					WT	PKM1 KO
mins	average	stdev	n	average	stdev	n			0.3283	0.2983
0.004933	0.957219	0.014247	94	0.955715	0.011029	92			0.321	0.1376
0.109033	0.958132			0.956581					0.2314	0.1184
0.207567	0.958969			0.957827					0.2233	0.2068
0.308767	0.960177			0.958957					0.1611	0.1796
0.405	0.960401			0.959076					0.3482	0.2962
0.507583	0.961877			0.960794					0.3678	0.2275
0.60735	0.964613			0.963669					0.7139	0.1703
0.7074	0.964436			0.963662					0.5555	0.186
0.806567	0.965467			0.965161					0.3704	0.3152
0.906533	0.966049			0.965859					0.421	0.4588
1.00628	0.967024			0.966975					0.3768	0.3515
1.10838	0.967953			0.967648					0.4086	0.2075
1.20512	0.969062			0.968734					0.7309	0.2176
1.30638	0.969713			0.96955					0.5616	0.2253
1.40647	0.970556			0.970256					0.7985	0.2691
1.5063	0.971275			0.971479					0.7747	0.3092
1.60647	0.97206			0.971975					1.019	0.4287
1.70627	0.972118			0.972192					0.4135	0.2321
1.80668	0.972762			0.972676					0.7888	0.3664
1.90633	0.972933			0.972976					0.832	0.2211
2.00642	0.973386			0.973356					0.4165	0.4862
2.10632	0.973746			0.974069					0.6535	0.1894
2.2065	0.97488			0.975181					0.569	0.3402
2.30637	0.97477			0.975047					0.5233	0.5081
2.40678	0.974788			0.975395					0.6248	0.4072
2.50653	0.975495	0.009703	94	0.975609	0.00788	92			0.2838	0.3106
2.60633	0.976061			0.976586					0.6991	0.6539
2.70843	0.976691			0.976916					0.3515	0.2923
2.80622	0.976951			0.977174					0.2577	0.4026
2.90722	0.977471			0.977574					0.794	0.9642
3.00512	0.97782			0.977976					0.9731	0.405
3.10525	0.978009			0.978388					0.2555	0.875
3.20473	0.978204			0.978714					0.1914	0.2431
3.3051	0.978017			0.978384					0.4126	0.3923
3.40638	0.978788			0.979131					0.9285	0.2996
3.50663	0.979262			0.979653					0.515	0.5832
3.60643	0.979196			0.979599					1.085	0.381
3.70638	0.979513			0.979772					0.9063	0.6004
3.80735	0.979548			0.979701					1.048	0.3819
3.90668	0.979942			0.980144					1.201	0.2188
4.00638	0.980095			0.980475					1.441	0.7182
4.10643	0.980443			0.980529					1.363	0.57
4.20638	0.980335			0.981032					1.281	0.6064
4.30743	0.980794			0.981123					0.9272	0.2326
4.40515	0.980527			0.980839					0.1962	0.1232
4.50757	0.980734			0.980949					0.3548	0.3127
4.60682	0.980994			0.981346					0.1422	0.2508
4.7067	0.981163			0.981561					0.06	0.3949
4.8065	0.981524			0.981773					0.4648	0.4914
4.90673	0.981732			0.981917					0.2082	0.4936
5.00647	0.982278	0.007624	94	0.982513	0.00607	92			0.3262	0.4524
5.10662	0.98239			0.982835					0.03751	0.3914
5.20642	0.982481			0.982616					0.4974	0.3535
5.3051	0.982837			0.982961					0.3228	0.5646
5.40512	0.982605			0.982629					0.6385	0.7188
5.50668	0.982779			0.982911					0.5092	0.6045
5.6066	0.983014			0.983098					0.6912	0.5914
5.70652	0.983267			0.983239					0.4554	0.3863
5.8065	0.983436			0.983041					0.7351	0.5931
5.90617	0.98367			0.983519					0.5889	0.4766
6.00685	0.983643			0.983555					0.4084	0.3256
6.10638	0.983877			0.983695					0.4492	0.4322
6.20632	0.984134			0.983905					0.4587	0.532
6.30658	0.984109			0.984104					0.5906	0.4697
6.40643	0.984261			0.984314					0.3722	0.5129
6.50637	0.984187			0.984118					0.4394	0.1462
6.60653	0.984712			0.984359					0.2405	0.3142
6.70657	0.985378			0.985219					0.3969	0.3443
6.80642	0.985108			0.984857					0.5136	0.3552
6.90663	0.985296			0.985099					0.5222	0.32
7.0072	0.985135			0.984758					0.65	0.352
7.1051	0.986068			0.985898					0.7099	0.3484
7.20513	0.985986			0.985735					0.5333	0.3082
7.30645	0.985976			0.986153					0.3763	0.2595
7.40672	0.986255			0.98601					0.5809	0.2742
7.50675	0.986205	0.005946	94	0.98612	0.00467	92			0.6767	0.5682
7.60663	0.986438			0.986223					0.5498	0.4441
7.7065	0.98659			0.986435					0.5368	0.1311
7.8064	0.987146			0.986865					0.514	0.1829
7.90642	0.986991			0.986754					0.5177	0.4529
8.00642	0.986986			0.986757					0.1975	0.2268
8.10645	0.986781			0.986239					0.2363	0.2772
8.20668	0.987027			0.986778					0.2932	0.1881
8.30633	0.98717			0.986967					0.5295	0.1594
8.40633	0.987393			0.98717					0.4063	0.1821
8.50677	0.987388			0.987107					0.6003	0.2212
8.60518	0.987422			0.987182					0.8775	0.1331
8.70668	0.987594			0.98746					0.6058	0.334
8.80648	0.987615			0.987226					0.2091	0.249
8.90657	0.987704			0.987509					0.2799	0.127
9.00685	0.987939			0.987632					0.9624	0.08377
9.10685	0.987654			0.987475					0.8427
9.20642	0.987977			0.987592					0.6638
9.30705	0.988032			0.987747
9.40668	0.987842			0.987463
9.50685	0.987512			0.987102
9.60662	0.988618			0.988303
9.70653	0.988096			0.987739
9.80655	0.988241			0.988149
9.90648	0.988198			0.987841
10.0069	0.988011	0.005828	94	0.987783	0.004792	92
10.1062	0.988661			0.988383
10.2063	0.98839			0.988166
10.3048	0.988667			0.9885
10.4073	0.988001			0.987518
10.5049	0.988242			0.987967
10.6083	0.989042			0.988973
10.7064	0.988471			0.987967
10.8064	0.988297			0.987989
10.9066	0.988438			0.98809
11.0052	0.989026			0.988767
11.1075	0.989124			0.988816
11.2053	0.988972			0.988542
11.3072	0.988904			0.988637
11.4064	0.989971			0.98987
11.5066	0.989984			0.989916
11.6065	0.990197			0.99024
11.7065	0.990163			0.990195
11.8065	0.990212			0.990217
11.9069	0.990424			0.990323
12.0067	0.990601			0.990502
12.1053	0.990584			0.990339
12.2065	0.990786			0.990647
12.3053	0.990673			0.990649
12.4064	0.991017			0.990862
12.5052	0.990984	0.004238	94	0.99091	0.003223	92
12.6065	0.990981			0.990918
12.7065	0.990828			0.990851
12.8065	0.991205			0.991059
12.9068	0.991351			0.991062
13.0064	0.99147			0.991419
13.1063	0.991631			0.991425
13.2075	0.991671			0.991495
13.3048	0.991495			0.991424
13.405	0.99157			0.99146
13.5052	0.991626			0.991594
13.6075	0.99184			0.991652
13.7073	0.991326			0.991066
13.8049	0.992145			0.991938
13.9062	0.991108			0.99088
14.0051	0.991961			0.991808
14.1065	0.992134			0.991937
14.2067	0.992227			0.99205
14.3067	0.992278			0.992082
14.4066	0.992393			0.992087
14.5066	0.992398			0.99216
14.6069	0.992479			0.992358
14.7066	0.992419			0.992217
14.8065	0.992654			0.992467
14.9067	0.993013			0.992679
15.0066	0.992582	0.003726	94	0.992502	0.002801	92
15.1066	0.992599			0.992454
15.207	0.992783			0.992325
15.3066	0.993004			0.99256
15.4065	0.992903			0.992744
15.5065	0.993021			0.992796
15.6062	0.992583			0.9923
15.7051	0.992432			0.992067
15.8047	0.992532			0.992077
15.9049	0.992872			0.992471
16.005	0.992782			0.992404
16.1049	0.992894			0.992507
16.2068	0.993368			0.993026
16.3065	0.993346			0.993083
16.4078	0.993214			0.992995
16.5077	0.993514			0.993151
16.6075	0.99335			0.992944
16.7065	0.993447			0.993051
16.8066	0.993892			0.99352
16.9067	0.993721			0.993517
17.0068	0.99361			0.993372
17.1064	0.993674			0.9934
17.2068	0.993828			0.993533
17.3066	0.993375			0.992993
17.4066	0.993914			0.993765
17.5066	0.993323	0.004587	94	0.993005	0.004642	92
17.6048	0.994273			0.993912
17.7051	0.993502			0.993071
17.8063	0.994186			0.993969
17.9067	0.994322			0.994258
18.0062	0.994108			0.99385
18.1049	0.99453			0.994471
18.2064	0.994491			0.994384
18.3065	0.994087			0.993816
18.4064	0.994573			0.994538
18.5063	0.994523			0.994437
18.6069	0.994253			0.993882
18.7066	0.994521			0.994192
18.8066	0.994628			0.994383
18.905	0.994575			0.99423
19.0067	0.994722			0.994491
19.1063	0.994912			0.994568
19.2068	0.995176			0.99488
19.3064	0.995304			0.995052
19.4066	0.994686			0.994322
19.506	0.995401			0.995147
19.6053	0.994971			0.994756
19.7065	0.995062			0.994968
19.805	0.995418			0.995142
19.9077	0.995279			0.994994
20.0053	0.995226	0.0026	94	0.994918	0.002403	92
20.1064	0.995135			0.995001
20.2064	0.995566			0.995482
20.3063	0.994811			0.994417
20.4073	0.995226			0.994897
20.5068	0.995132			0.99462
20.607	0.994953			0.994545
20.7066	0.994677			0.994411
20.8063	0.995821			0.99573
20.9065	0.995985			0.995713
21.0066	0.995837			0.995692
21.1066	0.996053			0.995907
21.2067	0.996062			0.995742
21.3065	0.995589			0.995245
21.4067	0.995554			0.995231
21.5063	0.996199			0.995909
21.6074	0.995913			0.995794
21.7066	0.996183			0.995935
21.8072	0.996089			0.995714
21.9066	0.996274			0.995924
22.0065	0.996235			0.99595
22.1064	0.996224			0.99593
22.2066	0.996379			0.996125
22.3067	0.996079			0.995807
22.4066	0.996552			0.996348
22.5076	0.996559	0.002347	94	0.996264	0.002178	92
22.6078	0.996791			0.996366
22.7051	0.996741			0.996374
22.8068	0.996994			0.996647
22.9066	0.996941			0.996684
23.0051	0.996717			0.996472
23.1069	0.996737			0.996366
23.2064	0.996958			0.996592
23.305	0.996923			0.996561
23.406	0.997375			0.997362
23.5049	0.997605			0.99748
23.6071	0.996575			0.996313
23.7065	0.997739			0.997612
23.8073	0.997465			0.99737
23.905	0.997122			0.996975
24.0077	0.997593			0.997352
24.1053	0.99765			0.997581
24.2048	0.996906			0.99651
24.3066	0.997757			0.99752
24.4064	0.997858			0.997542
24.5051	0.997609			0.997329
24.6067	0.997682			0.997544
24.7066	0.99713			0.996616
24.8066	0.996581			0.996265
24.9067	0.996927			0.996373
25.0069	0.996972	0.003877	94	0.996429	0.004333	92
25.1064	0.997165			0.99688
25.2063	0.997012			0.996631
25.3075	0.998073			0.998025
25.4066	0.998289			0.998219
25.5066	0.997466			0.997053
25.6065	0.99813			0.997733
25.7065	0.998109			0.997821
25.8063	0.997933			0.997724
25.9075	0.997997			0.998022
26.0065	0.998208			0.998086
26.1067	0.998229			0.998111
26.2068	0.998604			0.998265
26.3068	0.998973			0.998849
26.4066	0.999045			0.998804
26.5068	0.998887			0.998989
26.6068	0.999228			0.999252
26.7066	0.999217			0.999086
26.8066	0.999156			0.998995
26.9068	0.999212			0.99906
27.0063	0.999512			0.999344
27.1066	0.999438			0.999189
27.2066	0.999306			0.999178
27.3068	0.999334			0.999392
27.4064	0.99945			0.999342
27.505	0.999323	0.000666	94	0.999317	0.000756	92
27.6051	0.999443			0.999205
27.7066	0.999429			0.999356
27.8066	0.999361			0.999398
27.9066	0.999631			0.999591
28.0068	0.999628			0.999653
28.1064	0.999679			0.999706
28.2063	0.999811			0.999774
28.3078	0.999802			0.999796
28.4051	0.998708			0.998524
28.5072	0.999805			0.99982
28.6066	0.999951			1.00001
28.7066	1.00001			0.999928
28.8068	0.999929			0.999971
28.9078	1.00013			1.00019
29.0051	1.00012			0.999969
29.1065	1.00014			0.999961
29.2064	1.00012			1.00031
29.3067	1.00016			1.00008
29.4069	1.00022			1.00017
29.5067	1.00041			1.00027
29.6068	1.00029			1.00043
29.7067	1.00036			1.00043
29.8069	1.0003			1.00051
29.9065	1.00044			1.0005
30.0067	1.00066	0.000851	94	1.00067	0.000851	92
30.1066	1.00036			1.00048
30.2066	1.00042			1.00057
30.3064	1.00052			1.00066
30.4074	1.00045			1.00056
30.5069	1.0002			1.00018
30.6064	1.0006			1.00057
30.7071	1.00082			1.00089
30.8069	1.00139			1.00133
30.9052	1.00137			1.00146
31.0066	1.00151			1.00185
31.1065	1.00122			1.00143
31.2066	1.00098			1.00154
31.3067	1.00035			1.00119
31.4066	0.999925			1.00101
31.5051	0.999066			1.00036
31.6075	0.998514			0.999958
31.7076	0.997996			0.9999
31.8078	0.996984			0.999132
31.9052	0.996239			0.998632
32.0053	0.99561			0.99829
32.1075	0.99489			0.997723
32.2074	0.994439			0.99741
32.308	0.993938			0.997022
32.4084	0.993649			0.996753
32.5064	0.992985	0.004988	94	0.996228	0.003485	92
32.6065	0.992928			0.996103
32.7066	0.992656			0.995751
32.8066	0.99233			0.995277
32.9066	0.99183			0.994834
33.0067	0.991548			0.99472
33.1068	0.991443			0.994595
33.2071	0.990927			0.993889
33.3067	0.991223			0.994421
33.4069	0.990675			0.99353
33.5067	0.99073			0.99349
33.6068	0.990667			0.993766
33.7064	0.99111			0.994095
33.8071	0.991427			0.994347
33.9066	0.991523			0.994321
34.0065	0.991838			0.99444
34.1064	0.991764			0.994426
34.2069	0.992234			0.994866
34.3067	0.992011			0.994562
34.4065	0.992309			0.994572
34.5066	0.992947			0.995079
34.6066	0.993115			0.995347
34.7068	0.994012			0.996263
34.8064	0.994396			0.996551
34.9065	0.994856			0.996784
35.0067	0.995338	0.00837	94	0.99736	0.009479	92
35.1065	0.99594			0.997832
35.2052	0.996263			0.998088
35.3066	0.997137			0.998607
35.4066	0.99793			0.999251
35.5063	0.998401			0.999611
35.6068	0.999169			0.999755
35.7066	1.00011			1.00045
35.807	1.00115			1.00089
35.9068	1.00239			1.00198
36.005	1.00305			1.00235
36.1078	1.0039			1.00301
36.205	1.00504			1.00376
36.3066	1.00625			1.00461
36.4066	1.00712			1.00492
36.5066	1.00819			1.00569
36.6068	1.00931			1.00604
36.707	1.01055			1.00666
36.8049	1.01124			1.00676
36.9054	1.01294			1.00799
37.0069	1.01432			1.0088
37.1066	1.01558			1.00952
37.2064	1.01683			1.01007
37.3063	1.01797			1.01067
37.408	1.01956			1.01171
37.5067	1.02075	0.026364	94	1.01222	0.019439	92
37.6066	1.02186			1.0127
37.7069	1.02312			1.01331
37.8071	1.02443			1.01407
37.9067	1.02556			1.01456
38.0066	1.02636			1.01504
38.1069	1.02723			1.01536
38.2066	1.02852			1.01616
38.3067	1.02969			1.01694
38.4066	1.03144			1.01791
38.5068	1.0324			1.01818
38.6068	1.03382			1.01903
38.707	1.03412			1.01915
38.8065	1.03554			1.02011
38.9081	1.03632			1.02066
39.0067	1.0372			1.02124
39.1067	1.03779			1.02121
39.2066	1.03824			1.02137
39.3067	1.03935			1.02186
39.4066	1.04042			1.0227
39.5067	1.04095			1.02305
39.6064	1.04176			1.02343
39.7067	1.04211			1.0238
39.8085	1.04293			1.02489
39.9067	1.04304			1.02499
40.0048	1.04388	0.03768	94	1.02543	0.023566	92
40.1066	1.044			1.02547
40.2064	1.04448			1.02607
40.3066	1.04515			1.02648
40.4065	1.04555			1.0269
40.5067	1.04578			1.02692
40.6067	1.04606			1.02747
40.7067	1.04618			1.02753
40.807	1.04706			1.02842
40.9068	1.04725			1.02839
41.0067	1.04726			1.02815
41.1069	1.04746			1.02871
41.2069	1.0481			1.02934
41.3078	1.04825			1.02955
41.4068	1.04832			1.02982
41.5065	1.04808			1.02982
41.6069	1.04778			1.02977
41.7066	1.04846			1.03053
41.8066	1.04843			1.03043
41.9067	1.04852			1.03059
42.005	1.04817			1.03061
42.1068	1.04855			1.03113
42.2067	1.04848			1.03127
42.3067	1.04814			1.03121
42.4066	1.04786			1.03105
42.507	1.04796	0.031168	94	1.03136	0.021912	92
42.607	1.0476			1.03123
42.7071	1.0476			1.03132
42.807	1.04722			1.03126
42.9068	1.04692			1.03096
43.0067	1.04709			1.03122
43.1069	1.047			1.03106
43.2067	1.04674			1.03098
43.3067	1.04613			1.03056
43.4067	1.04579			1.03028
43.5067	1.04552			1.03033
43.6067	1.04516			1.0302
43.7064	1.04489			1.02999
43.8078	1.04515			1.03017
43.9051	1.04498			1.0299
44.0085	1.04478			1.02983
44.1068	1.04422			1.02967
44.2073	1.04368			1.02904
44.3051	1.04323			1.02897
44.4066	1.04332			1.02878
44.5068	1.04294			1.02858
44.6067	1.04274			1.02845
44.7066	1.04235			1.02822
44.8072	1.04198			1.0278
44.9066	1.04167			1.0279
45.0066	1.04128	0.025143	94	1.02755	0.015186	92
45.1067	1.04074			1.02704
45.2071	1.04063			1.0268
45.3068	1.04021			1.0267
45.4068	1.03986			1.02625
45.5067	1.03944			1.02597
45.6066	1.03929			1.02584
45.7071	1.03873			1.0255
45.8071	1.03879			1.02546
45.9068	1.03828			1.02511
46.0071	1.03817			1.02484
46.1069	1.03768			1.02425
46.2072	1.03732			1.02391
46.3069	1.03705			1.02357
46.4068	1.0366			1.0234
46.5066	1.03634			1.02319
46.6078	1.03572			1.02254
46.7075	1.03534			1.02206
46.8047	1.03494			1.0216
46.9059	1.03504			1.02192
47.0052	1.03486			1.02181
47.1069	1.03456			1.02153
47.207	1.03428			1.02122
47.3067	1.03398			1.02118
47.4068	1.03369			1.02086
47.5068	1.03285	0.022413	94	1.02017	0.008481	92
47.6071	1.03352			1.02101
47.7067	1.03321			1.02076
47.807	1.03292			1.02056
47.9067	1.03303			1.02037
48.0066	1.03265			1.02034
48.1069	1.03247			1.02033
48.2067	1.03202			1.01996
48.3066	1.03193			1.01988
48.407	1.03184			1.01984
48.5067	1.03168			1.01974
48.6069	1.03137			1.01957
48.7064	1.03117			1.01943
48.8066	1.03093			1.01945
48.9078	1.03088			1.01937
49.0048	1.03058			1.01931
49.1048	1.03022			1.0191
49.2075	1.03025			1.01912
49.308	1.02994			1.01906
49.4079	1.02873			1.01797
49.507	1.02944			1.01901
49.6066	1.02911			1.01882
49.7068	1.02899			1.01885
49.8066	1.02885			1.01886
49.9068	1.02829			1.01829
50.0069	1.02869	0.021021	94	1.01875	0.00662	92
50.1067	1.02757			1.01775
50.2067	1.02848			1.0189
50.3066	1.02822			1.01877
50.4066	1.02706			1.01755
50.5069	1.02779			1.01865
50.6069	1.02776			1.01879
50.7069	1.0273			1.0186
50.8068	1.02654			1.01756
50.9051	1.0271			1.01836
51.0069	1.02713			1.01843
51.1068	1.02697			1.0183
51.2067	1.02624			1.01778
51.3068	1.026			1.01743
51.4084	1.0261			1.01752
51.507	1.02681			1.01854
51.6065	1.02661			1.01854
51.7073	1.02613			1.01796
51.806	1.02584			1.01786
51.9052	1.02566			1.01771
52.0067	1.02557			1.01794
52.1069	1.02537			1.01776
52.2069	1.02527			1.01778
52.3069	1.02518			1.01796
52.4069	1.02505			1.01792
52.5067	1.02477	0.01767	94	1.01779	0.006188	92
52.6049	1.02458			1.01782
52.7065	1.02455			1.018
52.8051	1.02423			1.01783
52.9069	1.02426			1.01802
53.0071	1.02402			1.01789
53.107	1.02393			1.01801
53.2067	1.02381			1.01793
53.3066	1.02342			1.01793
53.4069	1.02338			1.0179
53.5069	1.02299			1.01761
53.607	1.02313			1.01778
53.7067	1.02325			1.01813
53.8049	1.02286			1.01819
53.9054	1.02317			1.01861
54.0067	1.02289			1.01845
54.1069	1.02263			1.01819
54.2067	1.02255			1.01815
54.3078	1.02219			1.01793
54.4081	1.0221			1.01795
54.5078	1.02184			1.01781
54.6047	1.02213			1.01813
54.707	1.02211			1.01824
54.8069	1.02191			1.01807
54.907	1.02158			1.0178
55.0077	1.02151	0.013414	94	1.01793	0.006352	92
55.1082	1.02089			1.01699
55.2067	1.02074			1.01745
55.3072	1.02018			1.01675
55.4068	1.01999			1.01704
55.5067	1.01983			1.01711
55.6066	1.01956			1.01685
55.7067	1.01958			1.01698
55.8065	1.01908			1.01688
55.9072	1.01899			1.01694
56.0074	1.01857			1.01687
56.1067	1.01842			1.01681
56.2066	1.01858			1.01705
56.3066	1.018			1.01672
56.4082	1.01909			1.01803
56.5078	1.01769			1.01659
56.6073	1.01778			1.01676
56.7078	1.01762			1.01686
56.8081	1.01785			1.01721
56.908	1.01733			1.01693
57.0066	1.01732			1.01716
57.106	1.01705			1.01702
57.205	1.01711			1.01697
57.3077	1.01697			1.01707
57.4051	1.01684			1.01723
			0			0

## Sheet: 6E
Average															AUC
Time (min)	WT						PKM1 KO								WT	PKM1 KO
1.5	0.000229	0.000508	0.000591	0.000519	0.000445	0.000368	0.000516	0.00045	0.000456	0.000794	0.000594	0.000368			0.05949	0.01218
3	0.000251	0.00056	0.000585	0.000162	0.000392	0.000342	0.000664	0.00056	0.000531	0.000445	0.000502	0.000258			0.08336	0.01925
4.5	0.000363	0.000402	0.000402	0.000342	0.000318	0.000239	0.000249	0.000269	0.000403	0.00034	0.000331	0.000248			0.05732	0.01271
6	0.018312	0.016029	0.016356	0.011344	0.007531	0.009425	0.001112	0.002098	0.001389	0.001891	0.001267	0.000856			0.05993	0.0163
7.5	0.014974	0.032414	0.015957	0.022956	0.014678	0.018927	0.002836	0.004589	0.003031	0.004506	0.004108	0.001624			0.04284	0.01413
9	0.00295	0.003842	0.002573	0.002719	0.002738	0.00251	0.001759	0.002948	0.001448	0.001642	0.001537	0.00131			0.05005	0.00961
10.5	0.001157	0.001135	0.001209	0.001095	0.001302	0.000949	0.000826	0.001201	0.000829	0.000848	0.000745	0.000708
12	0.000871	0.000777	0.000783	0.000719	0.000991	0.000614	0.000625	0.00082	0.000634	0.000787	0.000648	0.000673
13.5	0.000796	0.000744	0.000773	0.000628	0.000754	0.000539	0.000552	0.000681	0.000628	0.000682	0.000616	0.000745
15	0.000843	0.000867	0.000728	0.000641	0.000814	0.000563	0.000572	0.00072	0.000632	0.000684	0.000664	0.000739

## Sheet: 6F
Average															AUC
Time (min)	WT						PKM1 KO									WT						PKM1 KO
1.5	0	0	0	0.001235	0	0	0	0	0	0.000346	0.00028	0.000368			10G	0.07764	0.1116	0.1002	0.1148	0.03771	0.04485	0.09195	0.03002	0.07009	0.09112	0.05835	0.06848
3	0	0	0	0.001074	0	0	0	0	0	0.000172	0.000181	0.000229			10G/QRLA	0.2299	0.249	0.1827	0.2211	0.05805	0.104	0.1979	0.07103	0.1127	0.1843	0.1247	0.1461
4.5	0.000722	0	0.00035	0.00097	0.000879	0.000975	0.008724	0.001922	0.00376	0.006131	0.002502	0.001173
6	0.029964	0.044297	0.03836	0.040788	0.015799	0.016807	0.027657	0.009385	0.030746	0.031677	0.02013	0.02533
7.5	0.006119	0.010487	0.011552	0.014721	0.00358	0.004799	0.009267	0.002732	0.004527	0.007564	0.004888	0.004511
9	0.001549	0.003529	0.003738	0.00495	0.001048	0.001135	0.002357	0.001078	0.001877	0.003323	0.001778	0.003807
10.5	0.003362	0.003932	0.003008	0.003408	0.000817	0.001177	0.004417	0.001369	0.001015	0.002539	0.002284	0.00245
12	0.003038	0.003944	0.003259	0.003984	0.001165	0.001879	0.004171	0.001274	0.001721	0.00363	0.002935	0.003071
13.5	0.004717	0.005359	0.004843	0.00561	0.001639	0.002443	0.006507	0.002164	0.003194	0.004921	0.003595	0.003952
15	0.005299	0.005745	0.003777	0.005129	0.001307	0.002346	0.005119	0.002105	0.003531	0.008049	0.004082	0.003894
16.5	0.033302	0.027983	0.024796	0.024808	0.0088	0.015585	0.030787	0.010342	0.021684	0.034401	0.026266	0.025363
18	0.020732	0.024288	0.01931	0.023607	0.005022	0.009221	0.021021	0.006901	0.009728	0.015367	0.011153	0.015815
19.5	0.019336	0.020413	0.016988	0.019411	0.005375	0.009199	0.010312	0.001732	0.006294	0.00815	0.005625	0.006699
21	0.017551	0.019804	0.014176	0.018452	0.004646	0.007364	0.017601	0.005931	0.007381	0.01284	0.009743	0.011236
22.5	0.015051	0.018286	0.010457	0.018315	0.005314	0.006618	0.010886	0.005635	0.00696	0.009501	0.006231	0.00954
24	0.028503	0.023839	0.018944	0.021841	0.005405	0.011636	0.018047	0.006415	0.010932	0.017795	0.012971	0.015966
25.5	0.024471	0.032888	0.019934	0.022052	0.005863	0.012835	0.026515	0.010856	0.016591	0.031579	0.017021	0.017578
27	0.021963	0.024997	0.019191	0.022679	0.005354	0.009382	0.024323	0.009424	0.012828	0.02092	0.014575	0.015816

## Sheet: 6G
Average traces									AUC
	Con			PKM2 KO					WT	PKM2 KO
mins	average	stdev	n	average	stdev	n			0.3454	0.6808
0.004933	0.962875	0.01046	58	0.961976	0.009647	61			0.5682	0.7731
0.109033	0.963474			0.962744					0.6222	0.6965
0.207567	0.963394			0.962771					0.7972	0.7793
0.308767	0.963972			0.964309					0.5792	0.6864
0.405	0.965142			0.965152					1.282	0.7976
0.507583	0.966349			0.966586					0.4401	0.4476
0.60735	0.966985			0.967246					0.7443	0.4165
0.7074	0.967892			0.968004					0.5434	1.001
0.806567	0.968531			0.968467					0.7065	0.6743
0.906533	0.96912			0.969346					0.5753	0.7909
1.00628	0.969571			0.969942					0.6644	0.6389
1.10838	0.970592			0.970758					0.517	0.7266
1.20512	0.971213			0.971361					1.05	0.4081
1.30638	0.971146			0.971579					0.4767	0.3666
1.40647	0.971579			0.971785					0.4024	0.7704
1.5063	0.972192			0.972284					0.3455	0.6067
1.60647	0.972685			0.972728					0.4164	0.2109
1.70627	0.972983			0.972915					0.2556	0.8296
1.80668	0.973448			0.973634					0.1608	0.7193
1.90633	0.973591			0.97367					0.5029	1.153
2.00642	0.974207			0.974324					0.208	0.5826
2.10632	0.974405			0.9744					0.1286	0.8883
2.2065	0.974892			0.974894					0.307	0.7566
2.30637	0.974989			0.975082					0.3918	1.143
2.40678	0.975454			0.975408					0.3601	0.8305
2.50653	0.975776	0.007412	58	0.975875	0.006742	61			0.4624	1.001
2.60633	0.975572			0.975945					0.8347	1.082
2.70843	0.97594			0.976299					0.7197	0.7136
2.80622	0.976552			0.976705					0.896	0.3846
2.90722	0.976737			0.976953					0.6445	0.888
3.00512	0.976791			0.977087					0.4421	1.065
3.10525	0.977347			0.977351					0.2283	0.8984
3.20473	0.977682			0.977915					0.8828	1.057
3.3051	0.977817			0.978076					0.4841	1.469
3.40638	0.977824			0.978178					0.652
3.50663	0.978197			0.978498					0.652
3.60643	0.97832			0.978576					0.3669
3.70638	0.97875			0.978916					0.4925
3.80735	0.978914			0.979143					0.1494
3.90668	0.978968			0.979269					0.2919
4.00638	0.979287			0.979418					0.1073
4.10643	0.979423			0.97943					0.372
4.20638	0.979396			0.979681					0.2512
4.30743	0.97978			0.979861					0.1877
4.40515	0.98016			0.980203					0.5355
4.50757	0.980419			0.980525					0.3777
4.60682	0.980653			0.980777					1.186
4.7067	0.980616			0.98083					0.7939
4.8065	0.980917			0.98122					0.7734
4.90673	0.980916			0.981154					1.038
5.00647	0.981183	0.00613	58	0.981313	0.005646	61			0.867
5.10662	0.981492			0.98176					1.327
5.20642	0.981351			0.981549					0.9398
5.3051	0.981532			0.981587					0.9795
5.40512	0.981881			0.982023					0.8201
5.50668	0.981827			0.981999					1.243
5.6066	0.982085			0.982206					0.4602
5.70652	0.982386			0.982474
5.8065	0.982207			0.982475
5.90617	0.98267			0.98271
6.00685	0.98273			0.982778
6.10638	0.983051			0.983142
6.20632	0.983082			0.98337
6.30658	0.983006			0.983151
6.40643	0.983032			0.983275
6.50637	0.983479			0.983614
6.60653	0.983482			0.983601
6.70657	0.983762			0.983839
6.80642	0.983793			0.983814
6.90663	0.984145			0.98423
7.0072	0.984421			0.984526
7.1051	0.984399			0.98463
7.20513	0.98461			0.98455
7.30645	0.984782			0.984881
7.40672	0.984919			0.984955
7.50675	0.984952	0.005595	58	0.985065	0.004547	61
7.60663	0.985172			0.985383
7.7065	0.98521			0.985421
7.8064	0.985217			0.985286
7.90642	0.985458			0.985603
8.00642	0.985015			0.985169
8.10645	0.985669			0.985765
8.20668	0.985847			0.98594
8.30633	0.985979			0.98591
8.40633	0.986127			0.986141
8.50677	0.986404			0.986359
8.60518	0.986238			0.986369
8.70668	0.986303			0.986466
8.80648	0.986107			0.986338
8.90657	0.986622			0.98673
9.00685	0.986859			0.986992
9.10685	0.986851			0.98681
9.20642	0.987004			0.987026
9.30705	0.98723			0.987246
9.40668	0.987124			0.987203
9.50685	0.987308			0.987325
9.60662	0.987351			0.987583
9.70653	0.987578			0.987547
9.80655	0.987499			0.987593
9.90648	0.987671			0.987813
10.0069	0.987619	0.004747	58	0.987811	0.003906	61
10.1062	0.987804			0.98801
10.2063	0.987494			0.987648
10.3048	0.98841			0.988256
10.4073	0.988352			0.988493
10.5049	0.988304			0.988372
10.6083	0.988561			0.988633
10.7064	0.988458			0.988574
10.8064	0.988665			0.988632
10.9066	0.988869			0.988778
11.0052	0.988964			0.988909
11.1075	0.988894			0.988812
11.2053	0.988821			0.988891
11.3072	0.989158			0.989197
11.4064	0.989081			0.989041
11.5066	0.989201			0.989451
11.6065	0.989005			0.988857
11.7065	0.989393			0.989373
11.8065	0.989594			0.98983
11.9069	0.989684			0.989623
12.0067	0.98993			0.990009
12.1053	0.989781			0.989857
12.2065	0.989882			0.989934
12.3053	0.990051			0.990214
12.4064	0.990062			0.990163
12.5052	0.990316	0.003735	58	0.990168	0.003144	61
12.6065	0.990202			0.990309
12.7065	0.990193			0.990426
12.8065	0.990435			0.990569
12.9068	0.990495			0.99055
13.0064	0.990497			0.990414
13.1063	0.990743			0.990674
13.2075	0.990786			0.990853
13.3048	0.991004			0.990931
13.405	0.990919			0.990854
13.5052	0.991001			0.991098
13.6075	0.991188			0.991176
13.7073	0.991033			0.990985
13.8049	0.991368			0.99126
13.9062	0.991253			0.991205
14.0051	0.991685			0.991658
14.1065	0.991775			0.991641
14.2067	0.991804			0.99173
14.3067	0.991838			0.991663
14.4066	0.99163			0.99152
14.5066	0.99166			0.991373
14.6069	0.991898			0.991786
14.7066	0.991827			0.991693
14.8065	0.991997			0.991986
14.9067	0.991954			0.99176
15.0066	0.99197	0.002846	58	0.991966	0.002822	61
15.1066	0.992085			0.991956
15.207	0.992136			0.992104
15.3066	0.992019			0.992086
15.4065	0.992039			0.992055
15.5065	0.992303			0.992264
15.6062	0.992444			0.992516
15.7051	0.992476			0.992669
15.8047	0.992369			0.992557
15.9049	0.992447			0.992586
16.005	0.99243			0.992675
16.1049	0.992682			0.992663
16.2068	0.992758			0.992631
16.3065	0.992803			0.992809
16.4078	0.992808			0.992771
16.5077	0.992884			0.99288
16.6075	0.992755			0.992747
16.7065	0.993048			0.99312
16.8066	0.993018			0.993043
16.9067	0.993058			0.993248
17.0068	0.993402			0.993377
17.1064	0.993229			0.993233
17.2068	0.993243			0.993225
17.3066	0.993421			0.993434
17.4066	0.993397			0.993535
17.5066	0.993511	0.00255	58	0.99337	0.00246	61
17.6048	0.993696			0.993745
17.7051	0.99364			0.993645
17.8063	0.993951			0.993891
17.9067	0.993749			0.993766
18.0062	0.994143			0.994092
18.1049	0.994136			0.993945
18.2064	0.994079			0.994108
18.3065	0.994214			0.993979
18.4064	0.99441			0.994217
18.5063	0.994294			0.994144
18.6069	0.994479			0.994425
18.7066	0.994499			0.994429
18.8066	0.994695			0.994706
18.905	0.994763			0.994677
19.0067	0.994814			0.994783
19.1063	0.994854			0.994891
19.2068	0.994836			0.994859
19.3064	0.994965			0.994994
19.4066	0.994848			0.99493
19.506	0.995203			0.995044
19.6053	0.994992			0.994879
19.7065	0.99509			0.994989
19.805	0.995102			0.994934
19.9077	0.995118			0.994905
20.0053	0.995503	0.002066	58	0.995429	0.001931	61
20.1064	0.995578			0.99533
20.2064	0.99544			0.995261
20.3063	0.995516			0.995467
20.4073	0.995693			0.995698
20.5068	0.995682			0.99561
20.607	0.995777			0.995697
20.7066	0.995651			0.995573
20.8063	0.995721			0.995732
20.9065	0.995664			0.995603
21.0066	0.995752			0.995621
21.1066	0.995762			0.995719
21.2067	0.996103			0.995939
21.3065	0.996016			0.995874
21.4067	0.995962			0.995907
21.5063	0.99603			0.995981
21.6074	0.996202			0.996032
21.7066	0.996409			0.996243
21.8072	0.996348			0.996295
21.9066	0.996291			0.996309
22.0065	0.996269			0.996177
22.1064	0.996644			0.996637
22.2066	0.996437			0.996463
22.3067	0.996585			0.996403
22.4066	0.996668			0.99653
22.5076	0.996397	0.001341	58	0.996351	0.001374	61
22.6078	0.996682			0.996629
22.7051	0.996705			0.996635
22.8068	0.996698			0.996669
22.9066	0.997			0.996874
23.0051	0.996902			0.996753
23.1069	0.997008			0.996845
23.2064	0.997123			0.997013
23.305	0.996806			0.996774
23.406	0.997329			0.997105
23.5049	0.997378			0.997222
23.6071	0.997268			0.996945
23.7065	0.997208			0.997314
23.8073	0.997108			0.997196
23.905	0.997392			0.997332
24.0077	0.997443			0.997409
24.1053	0.997266			0.997232
24.2048	0.997522			0.997424
24.3066	0.997873			0.997805
24.4064	0.997699			0.997631
24.5051	0.997838			0.997759
24.6067	0.99783			0.997776
24.7066	0.997847			0.997912
24.8066	0.997837			0.997793
24.9067	0.998207			0.998183
25.0069	0.998155	0.001042	58	0.99802	0.00117	61
25.1064	0.998192			0.998133
25.2063	0.998087			0.997982
25.3075	0.998167			0.997974
25.4066	0.998201			0.998088
25.5066	0.9984			0.998358
25.6065	0.99844			0.998309
25.7065	0.998355			0.998361
25.8063	0.99852			0.998287
25.9075	0.998538			0.998437
26.0065	0.998388			0.998252
26.1067	0.998848			0.998829
26.2068	0.998608			0.99854
26.3068	0.998579			0.99854
26.4066	0.998872			0.998891
26.5068	0.998706			0.998709
26.6068	0.999123			0.998857
26.7066	0.998982			0.998884
26.8066	0.99911			0.99877
26.9068	0.998892			0.99868
27.0063	0.999096			0.998865
27.1066	0.999043			0.998992
27.2066	0.999145			0.999013
27.3068	0.999148			0.998993
27.4064	0.999297			0.999036
27.505	0.999257	0.00078	58	0.999162	0.000666	61
27.6051	0.999263			0.999147
27.7066	0.999407			0.999466
27.8066	0.999277			0.999199
27.9066	0.999502			0.99945
28.0068	0.999512			0.999618
28.1064	0.999604			0.999562
28.2063	0.999779			0.999618
28.3078	0.999876			0.999801
28.4051	0.999858			0.999781
28.5072	0.999992			1.00002
28.6066	1.0001			1.00001
28.7066	0.999913			0.999807
28.8068	1.00009			0.999954
28.9078	0.999796			0.999871
29.0051	0.999929			1.00002
29.1065	0.999911			0.999925
29.2064	1.00006			1.00018
29.3067	0.999997			1.00011
29.4069	0.999953			1.00005
29.5067	1.00024			1.00036
29.6068	1.00038			1.00035
29.7067	1.00032			1.00025
29.8069	1.00043			1.00038
29.9065	1.00027			1.00033
30.0067	1.0005	0.000628	58	1.00036	0.000647	61
30.1066	1.00046			1.00037
30.2066	1.00059			1.00058
30.3064	1.00045			1.00046
30.4074	1.00069			1.00065
30.5069	1.00096			1.00092
30.6064	1.00128			1.00123
30.7071	1.00176			1.00171
30.8069	1.00187			1.00173
30.9052	1.00166			1.00144
31.0066	1.00177			1.00143
31.1065	1.00146			1.00102
31.2066	1.00113			1.00062
31.3067	1.00088			1.00029
31.4066	1.00058			0.999866
31.5051	0.999887			0.999095
31.6075	0.999105			0.998253
31.7076	0.998943			0.99797
31.8078	0.997958			0.997014
31.9052	0.996932			0.995926
32.0053	0.996723			0.995641
32.1075	0.99618			0.994966
32.2074	0.995565			0.994408
32.308	0.99472			0.993576
32.4084	0.994028			0.992853
32.5064	0.993449	0.003327	58	0.992157	0.003804	61
32.6065	0.993006			0.991768
32.7066	0.992782			0.991457
32.8066	0.992238			0.99143
32.9066	0.992021			0.991256
33.0067	0.991406			0.99057
33.1068	0.991512			0.991014
33.2071	0.991196			0.991021
33.3067	0.991329			0.991313
33.4069	0.991636			0.992052
33.5067	0.992101			0.99267
33.6068	0.992085			0.993601
33.7064	0.992553			0.994247
33.8071	0.992925			0.995616
33.9066	0.9932			0.996182
34.0065	0.993533			0.997141
34.1064	0.994311			0.998215
34.2069	0.994973			0.999331
34.3067	0.996047			1.0017
34.4065	0.997182			1.00361
34.5066	0.998039			1.0056
34.6066	0.99943			1.00746
34.7068	1.00069			1.00946
34.8064	1.00137			1.0105
34.9065	1.0027			1.01268
35.0067	1.00373	0.018916	58	1.01377	0.033169	61
35.1065	1.00544			1.01572
35.2052	1.00717			1.01734
35.3066	1.00892			1.01923
35.4066	1.00994			1.01991
35.5063	1.01216			1.02241
35.6068	1.01374			1.0233
35.7066	1.01511			1.02491
35.807	1.01684			1.02678
35.9068	1.01777			1.02779
36.005	1.01894			1.02964
36.1078	1.02045			1.03097
36.205	1.02188			1.0327
36.3066	1.02289			1.03394
36.4066	1.02413			1.03537
36.5066	1.02532			1.03668
36.6068	1.02633			1.0381
36.707	1.02716			1.03923
36.8049	1.02795			1.04007
36.9054	1.02905			1.04147
37.0069	1.0298			1.04242
37.1066	1.0311			1.04396
37.2064	1.03207			1.04496
37.3063	1.03271			1.04552
37.408	1.03384			1.04688
37.5067	1.03444	0.03	58	1.04747	0.034397	61
37.6066	1.03525			1.04836
37.7069	1.03602			1.04889
37.8071	1.03681			1.04952
37.9067	1.03715			1.04999
38.0066	1.03771			1.05096
38.1069	1.03847			1.05143
38.2066	1.03921			1.05205
38.3067	1.03933			1.05254
38.4066	1.03973			1.05291
38.5068	1.04035			1.05337
38.6068	1.04042			1.05332
38.707	1.04084			1.05362
38.8065	1.04118			1.05415
38.9081	1.04138			1.05434
39.0067	1.04144			1.05429
39.1067	1.04146			1.05453
39.2066	1.04168			1.05466
39.3067	1.04228			1.05538
39.4066	1.04224			1.05559
39.5067	1.04203			1.05563
39.6064	1.04243			1.05578
39.7067	1.04257			1.05602
39.8085	1.0427			1.0561
39.9067	1.04249			1.05612
40.0048	1.04263	0.025887	58	1.05595	0.024199	61
40.1066	1.04278			1.05622
40.2064	1.04282			1.05615
40.3066	1.04306			1.0566
40.4065	1.04299			1.05645
40.5067	1.04302			1.05601
40.6067	1.04323			1.05629
40.7067	1.04333			1.05621
40.807	1.04345			1.05598
40.9068	1.04321			1.05566
41.0067	1.04345			1.05555
41.1069	1.04336			1.05533
41.2069	1.04373			1.05546
41.3078	1.04346			1.05526
41.4068	1.04366			1.05513
41.5065	1.04346			1.05504
41.6069	1.04326			1.05476
41.7066	1.04321			1.05465
41.8066	1.04288			1.05448
41.9067	1.04296			1.05424
42.005	1.04318			1.05453
42.1068	1.04306			1.05444
42.2067	1.04299			1.05433
42.3067	1.04263			1.05377
42.4066	1.04279			1.05364
42.507	1.04257	0.02515	58	1.05348	0.023922	61
42.607	1.04239			1.05301
42.7071	1.04231			1.05281
42.807	1.04228			1.05275
42.9068	1.04198			1.05225
43.0067	1.04214			1.05217
43.1069	1.04184			1.05199
43.2067	1.04148			1.05163
43.3067	1.04145			1.05152
43.4067	1.04129			1.05125
43.5067	1.04122			1.05086
43.6067	1.04132			1.05058
43.7064	1.04123			1.05059
43.8078	1.04119			1.05025
43.9051	1.04084			1.04984
44.0085	1.04099			1.04982
44.1068	1.04121			1.04968
44.2073	1.04127			1.04948
44.3051	1.04096			1.04934
44.4066	1.0408			1.04882
44.5068	1.04049			1.04864
44.6067	1.04084			1.04854
44.7066	1.04062			1.04837
44.8072	1.04063			1.04819
44.9066	1.04059			1.04825
45.0066	1.0402	0.026265	58	1.04804	0.026949	61
45.1067	1.04008			1.04811
45.2071	1.04004			1.04766
45.3068	1.04012			1.04753
45.4068	1.03987			1.04746
45.5067	1.03986			1.04747
45.6066	1.03967			1.04705
45.7071	1.03963			1.04682
45.8071	1.03965			1.04658
45.9068	1.03939			1.04648
46.0071	1.03956			1.04655
46.1069	1.03939			1.0463
46.2072	1.03901			1.04607
46.3069	1.03895			1.04605
46.4068	1.03873			1.04569
46.5066	1.03853			1.04536
46.6078	1.03826			1.04538
46.7075	1.03818			1.04531
46.8047	1.03809			1.04508
46.9059	1.03791			1.045
47.0052	1.03784			1.04474
47.1069	1.03773			1.04449
47.207	1.03748			1.04451
47.3067	1.0373			1.0446
47.4068	1.03697			1.04405
47.5068	1.03694	0.025415	58	1.0441	0.026628	61
47.6071	1.03663			1.04387
47.7067	1.03642			1.04348
47.807	1.03633			1.04329
47.9067	1.03628			1.04339
48.0066	1.0361			1.04337
48.1069	1.0358			1.04312
48.2067	1.03569			1.04319
48.3066	1.03549			1.04272
48.407	1.03528			1.04276
48.5067	1.03514			1.04267
48.6069	1.03505			1.04272
48.7064	1.03513			1.04254
48.8066	1.0347			1.04228
48.9078	1.0347			1.04226
49.0048	1.03461			1.04221
49.1048	1.03435			1.0417
49.2075	1.03422			1.04171
49.308	1.03404			1.04128
49.4079	1.03388			1.04134
49.507	1.03372			1.04097
49.6066	1.03379			1.041
49.7068	1.03352			1.0406
49.8066	1.03345			1.04052
49.9068	1.03364			1.04058
50.0069	1.0333	0.022103	58	1.0402	0.022636	61
50.1067	1.03327			1.03984
50.2067	1.03328			1.03996
50.3066	1.03303			1.04008
50.4066	1.03305			1.03988
50.5069	1.03268			1.0394
50.6069	1.03268			1.03939
50.7069	1.03271			1.03885
50.8068	1.03225			1.03875
50.9051	1.0325			1.03854
51.0069	1.03226			1.03834
51.1068	1.03218			1.03809
51.2067	1.03173			1.03795
51.3068	1.03182			1.03794
51.4084	1.0316			1.03732
51.507	1.0316			1.03732
51.6065	1.03159			1.03731
51.7073	1.03154			1.03735
51.806	1.03129			1.03693
51.9052	1.03088			1.03639
52.0067	1.03077			1.0361
52.1069	1.0306			1.03595
52.2069	1.03064			1.03625
52.3069	1.03023			1.03565
52.4069	1.0299			1.03521
52.5067	1.02996	0.01667	58	1.03544	0.016405	61
52.6049	1.02977			1.03512
52.7065	1.02965			1.03482
52.8051	1.02937			1.03467
52.9069	1.02925			1.03468
53.0071	1.02893			1.0344
53.107	1.02881			1.03413
53.2067	1.02862			1.03389
53.3066	1.0288			1.03379
53.4069	1.02884			1.03374
53.5069	1.02832			1.0331
53.607	1.02808			1.03292
53.7067	1.02818			1.03283
53.8049	1.02796			1.03274
53.9054	1.02798			1.03273
54.0067	1.02788			1.03247
54.1069	1.02778			1.03244
54.2067	1.02758			1.03208
54.3078	1.02755			1.03189
54.4081	1.02728			1.03167
54.5078	1.02722			1.03152
54.6047	1.02701			1.0315
54.707	1.02707			1.03159
54.8069	1.02685			1.0314
54.907	1.02677			1.03127
55.0077	1.02682	0.01152	58	1.03134	0.01205	61
55.1082	1.02666			1.03096
55.2067	1.02688			1.03116
55.3072	1.02702			1.03129
55.4068	1.02672			1.03122
55.5067	1.02653			1.0311
55.6066	1.02663			1.03111
55.7067	1.0268			1.03104
55.8065	1.02658			1.03065
55.9072	1.02657			1.03056
56.0074	1.02674			1.03073
56.1067	1.02686			1.03089
56.2066	1.02688			1.03092
56.3066	1.02676			1.03076
56.4082	1.02659			1.03076
56.5078	1.02679			1.03082
56.6073	1.02665			1.03068
56.7078	1.02656			1.03062
56.8081	1.02644			1.03056
56.908	1.02648			1.03069
57.0066	1.02661			1.03085
57.106	1.02649			1.03099
57.205	1.02645			1.03109
57.3077	1.02647			1.03088
57.4051	1.02634			1.03071
			0			1

## Sheet: 6H
Average																AUC
Time (min)	WT						PKM2 KO									WT	PKM2 KO
1.5	0.000824	0.002246	0.000169	0.000888	0.000232	0.001241	0.000405	0.000618	0.000349	0.000503	0.000577	0.000648				0.05089	0.1567
3	0.000653	0.000515	0.000243	0.000271	0.000363	0.000618	6.18e-05	0.000414	0.000501	0.000426	0.000256	0.000348				0.0395	0.1913
4.5	0.001169	0.00063	0.000486	0.000484	0.000369	0.000451	0.000261	0.000597	0.00068	0.00074	0.000283	0.00015				0.05358	0.1345
6	0.005475	0.004913	0.011825	0.014208	0.016179	0.007698	0.025353	0.025385	0.021502	0.059593	0.025914	0.015265				0.07991	0.2884
7.5	0.017802	0.014367	0.016611	0.028267	0.023326	0.019222	0.05621	0.066313	0.044157	0.097764	0.07951	0.052808				0.07266	0.2187
9	0.004197	0.003012	0.002809	0.005142	0.004311	0.003276	0.013684	0.019156	0.012787	0.01807	0.024589	0.015289				0.05135	0.1448
10.5	0.002009	0.001305	0.001474	0.002332	0.001774	0.001605	0.004493	0.00842	0.005248	0.008132	0.007486	0.006865
12	0.001566	0.001011	0.000964	0.00136	0.001097	0.000947	0.002093	0.004113	0.002811	0.004009	0.003951	0.003023
13.5	0.001463	0.000929	0.000862	0.001103	0.000859	0.000804	0.00166	0.003136	0.001878	0.002892	0.002733	0.002102
15	0.001657	0.000957	0.001862	0.001244	0.001425	0.000909	0.001635	0.001392	0.001933	0.002917	0.00301	0.002169

## Sheet: 6I
Average																AUC
Time (min)	WT						PKM2 KO										WT						PKM2 KO
1.5	0	0	0	0	0	0	0	0	0	0	0	0				10G	0.01402	0.009568	0.01032	0.01496	0.0167	0.01278	0.02073	0.02265	0.02021	0.02846	0.02434	0.02786
3	0	0	0	0	0	0	0	0	0	0	0	0				10G/QRLA	0.04119	0.02854	0.03723	0.0447	0.05072	0.04243	0.07324	0.07969	0.07967	0.09401	0.08709	0.09839
4.5	0.000115	0	0	0	0	0	0	0	0	0	0	0
6	0.003083	0.002625	0.002823	0.004511	0.004897	0.003943	0.006443	0.005237	0.005673	0.008818	0.006953	0.006232
7.5	0.002768	0.002115	0.002101	0.002319	0.00276	0.002295	0.00332	0.004325	0.003236	0.003974	0.003987	0.00541
9	0.001164	0.000621	0.000699	0.000865	0.000828	0.000815	0.001207	0.001661	0.001229	0.001198	0.001341	0.001803
10.5	0.00061	0.000203	0.000115	0.000381	0.000385	0.000183	0.000477	0.000926	0.000668	0.000862	0.0006	0.000884
12	0.000423	0.000108	8.9e-05	0.00043	0.000334	6.38e-05	0.000395	0.000788	0.000616	0.000816	0.000653	0.000843
13.5	0.000493	0.000308	0.000585	0.000804	0.000892	0.000576	0.000911	0.001259	0.001247	0.001805	0.001721	0.001903
15	0.001495	0.000798	0.000938	0.001323	0.002076	0.00129	0.002132	0.001813	0.00161	0.003004	0.001944	0.002995
16.5	0.007879	0.006009	0.006741	0.008488	0.009368	0.007091	0.011944	0.012166	0.012122	0.013194	0.010431	0.01335
18	0.00421	0.002731	0.003723	0.004279	0.004418	0.003921	0.007339	0.006514	0.007869	0.009421	0.008862	0.011256
19.5	0.002732	0.001539	0.001931	0.002646	0.00264	0.002697	0.004263	0.005013	0.005118	0.006062	0.006454	0.007352
21	0.002797	0.00168	0.002018	0.002907	0.003538	0.002826	0.004555	0.0056	0.004352	0.006654	0.00717	0.007079
22.5	0.00315	0.002096	0.003491	0.003925	0.003987	0.003697	0.006452	0.007554	0.006741	0.008315	0.007281	0.008216
24	0.00399	0.002913	0.003761	0.004223	0.00502	0.004392	0.007479	0.007952	0.007595	0.010045	0.008388	0.009741
25.5	0.004226	0.003436	0.004358	0.005117	0.006366	0.00466	0.008718	0.009362	0.009832	0.010736	0.009798	0.010715
27	0.004825	0.003249	0.004332	0.004914	0.006322	0.005091	0.008101	0.010101	0.011084	0.009684	0.00978	0.00912
